# Supplementary material
Source: publisher figshare collection journal article supplement (https://frontiersin.figshare.com/ndownloader/files/18024125)
Supplement: Supplementary file 1 [file 18024125]

## Sheet: Core functions in all samples
ID	Test-Statistic	P	FDR_P	Bonferroni_P	maize_silage_mean	Co-digestion_mean	Ch_vulgaris_mean	Function
2037	9.87637	0.00211219	0.115818	1	13.6667	11	5.6	Root; GO:0008150 biological_process; GO:0005975 carbohydrate metabolic process; IPR002037 Glycoside hydrolase, family 8
514	7.84382	0.0051864	0.159919	1	12.1667	8.5	4	Root; GO:0008150 biological_process; GO:0005975 carbohydrate metabolic process; IPR000514 Glycoside hydrolase, family 39
743	7.08546	0.00748667	0.162814	1	16.8333	13.5	5.4	Root; GO:0008150 biological_process; GO:0005975 carbohydrate metabolic process; IPR000743 Glycoside hydrolase, family 28
1701	6.05215	0.0127618	0.185583	1	78.3333	61.5	38.4	Root; GO:0008150 biological_process; GO:0005975 carbohydrate metabolic process; IPR001701 Glycoside hydrolase, family 9
3385	3.75082	0.0496131	0.296776	1	76.8333	91.3333	103	Root; GO:0008150 biological_process; GO:0005975 carbohydrate metabolic process; IPR003385 Glycoside hydrolase, family 77
16286	3.51352	0.058003	0.303315	1	37.3333	45.8333	71.6	Root; GO:0008150 biological_process; GO:0005975 carbohydrate metabolic process; IPR000933 Glycoside hydrolase, family 29; IPR016286 Alpha-L-fucosidase, metazoa-type
3476	1.86075	0.192041	0.459226	1	13.5	9.16667	8.8	Root; GO:0008150 biological_process; GO:0005975 carbohydrate metabolic process; IPR003476 Glycoside hydrolase, family 42
2252	1.2293	0.322216	0.5954	1	36.8333	33.1667	28.6	Root; GO:0008150 biological_process; GO:0005975 carbohydrate metabolic process; IPR002252 Glycoside hydrolase family 36
322	1.1615	0.341425	0.59962	1	101	86.5	97.4	Root; GO:0008150 biological_process; GO:0005975 carbohydrate metabolic process; IPR000322 Glycoside hydrolase family 31
17736	0.529943	0.59999	0.788245	1	11.1667	12.6667	9.6	Root; GO:0008150 biological_process; GO:0005975 carbohydrate metabolic process; IPR001360 Glycoside hydrolase, family 1; IPR017736 Glycoside hydrolase, family 1, beta-glucosidase
1088	0.487655	0.624116	0.805232	1	50.3333	45.8333	44.4	Root; GO:0008150 biological_process; GO:0005975 carbohydrate metabolic process; IPR001088 Glycoside hydrolase, family 4
6232	0.191384	0.82794	0.924409	1	7	6.5	7.6	Root; GO:0008150 biological_process; GO:0005975 carbohydrate metabolic process; IPR001362 Glycoside hydrolase, family 32; IPR006232 Sucrose-6-phosphate hydrolase
18044	8.43703	0.00394222	0.149653	1	64	51.3333	34.4	Root; GO:0008150 biological_process; GO:0019538 protein metabolic process; IPR018044 Peptidase S11, D-alanyl-D-alanine carboxypeptidase A
5322	4.50773	0.0308147	0.239482	1	48.1667	52.8333	89.8	Root; GO:0008150 biological_process; GO:0019538 protein metabolic process; IPR005322 Peptidase C69, dipeptidase A
1733	3.73598	0.0500951	0.296869	1	6.83333	6.66667	4	Root; GO:0008150 biological_process; GO:0006807 nitrogen compound metabolic process; IPR001733 Peptidase S26B
5081	3.56765	0.0559547	0.303315	1	7.66667	4.66667	2.8	Root; GO:0008150 biological_process; GO:0019538 protein metabolic process; IPR005081 Peptidase U4, sporulation factor SpoIIGA
2470	3.25545	0.0690245	0.318351	1	33.1667	45.3333	74.4	Root; GO:0008150 biological_process; GO:0019538 protein metabolic process; IPR002470 Peptidase S9A, prolyl oligopeptidase
200	3.19652	0.071866	0.320958	1	8.66667	13.8333	17.8	Root; GO:0008150 biological_process; GO:0019538 protein metabolic process; IPR000200 Peptidase C10, streptopain
4134	3.01371	0.0815683	0.334214	1	19.1667	26.6667	33.8	Root; GO:0008150 biological_process; GO:0019538 protein metabolic process; IPR004134 Peptidase C1B, bleomycin hydrolase
667	3.00783	0.0819042	0.334214	1	9.83333	12	17.4	Root; GO:0008150 biological_process; GO:0019538 protein metabolic process; IPR000667 Peptidase S13, D-Ala-D-Ala carboxypeptidase C
4634	2.6359	0.106767	0.380613	1	34.3333	41.6667	52.8	Root; GO:0008150 biological_process; GO:0006807 nitrogen compound metabolic process; IPR004634 Peptidase S49, protease IV
1539	2.35306	0.131526	0.403154	1	97.8333	98.3333	82	Root; GO:0008150 biological_process; GO:0019538 protein metabolic process; IPR001539 Peptidase U32
1872	2.15835	0.152393	0.420826	1	18.6667	22.1667	24	Root; GO:0008150 biological_process; GO:0019538 protein metabolic process; IPR001872 Peptidase A8, signal peptidase II
5080	1.87145	0.190425	0.459226	1	14.1667	12.8333	10	Root; GO:0008150 biological_process; GO:0019538 protein metabolic process; IPR005080 Peptidase A25, germination protease
1333	1.73122	0.212892	0.483046	1	5.83333	8.5	12.8	Root; GO:0008150 biological_process; GO:0019538 protein metabolic process; IPR001333 Peptidase M32, carboxypeptidase Taq metallopeptidase
15567	1.45847	0.265854	0.539913	1	3.5	5	6.4	Root; GO:0008150 biological_process; GO:0019538 protein metabolic process; IPR015567 Peptidase M14B, caboxypeptidase D
11977	1.29758	0.304107	0.57833	1	16.6667	17.8333	28.2	Root; GO:0008150 biological_process; GO:0019538 protein metabolic process; IPR001567 Peptidase M3A/M3B; IPR011977 Peptidase M3B, oligoendopeptidase-related clade 3
787	1.21265	0.326815	0.5954	1	47.1667	48.3333	57.2	Root; GO:0008150 biological_process; GO:0019538 protein metabolic process; IPR000787 Peptidase M29, aminopeptidase II
11782	1.18019	0.336003	0.596862	1	32.6667	37.5	37.4	Root; GO:0008150 biological_process; GO:0019538 protein metabolic process; IPR001940 Peptidase S1C; IPR011782 Peptidase S1C, Do
4438	1.05982	0.372743	0.628885	1	42.6667	48.6667	46.4	Root; GO:0008150 biological_process; GO:0019538 protein metabolic process; IPR001567 Peptidase M3A/M3B; IPR004438 Peptidase M3B, oligoendopeptidase F
4387	0.948504	0.410855	0.662509	1	43.1667	47.6667	48	Root; GO:0008150 biological_process; GO:0019538 protein metabolic process; IPR004387 Peptidase M50, putative membrane-associated zinc metallopeptidase
23612	0.589227	0.567941	0.773184	1	5	4.66667	6.8	Root; GO:0008150 biological_process; GO:0019538 protein metabolic process; IPR023612 Peptidase M4
1548	0.306912	0.740541	0.880903	1	4	4.66667	3.4	Root; GO:0008150 biological_process; GO:0019538 protein metabolic process; IPR001548 Peptidase M2, peptidyl-dipeptidase A
11976	0.16914	0.846091	0.931508	1	20.8333	20.6667	22.6	Root; GO:0008150 biological_process; GO:0019538 protein metabolic process; IPR001567 Peptidase M3A/M3B; IPR011976 Peptidase M3B, oligoendopeptidase-related clade 2
223	0.126612	0.882073	0.948373	1	49.1667	50.5	49.2	Root; GO:0008150 biological_process; GO:0019538 protein metabolic process; IPR000223 Peptidase S26A, signal peptidase I
718	0.0612205	0.940866	0.98233	1	22.8333	21.6667	22.8	Root; GO:0008150 biological_process; GO:0019538 protein metabolic process; IPR000718 Peptidase M13
559	5.08361	0.0218933	0.209793	1	84	94.5	106.8	Root; GO:0008150 biological_process; GO:0009058 biosynthetic process; IPR000559 Formate-tetrahydrofolate ligase, FTHFS
24021	1.15132	0.344422	0.602739	1	30.3333	30.8333	36	Root; GO:0008150 biological_process; GO:0009058 biosynthetic process; IPR005244 FO synthase, subunit 2-like; IPR024021 [FeFe]-hydrogenase maturation HydE, radical SAM
3209	10.8924	0.00140282	0.115818	1	6.5	6.66667	2.2	Root; GO:0008150 biological_process; GO:0044281 small molecule metabolic process; IPR003209 Methenyltetrahydromethanopterin cyclohydrolase
16457	7.02356	0.00772108	0.162814	1	22.3333	22.1667	12.4	Root; GO:0008150 biological_process; GO:0009058 biosynthetic process; IPR016457 Formylmethanofuran dehydrogenase, subunit B
17678	4.48758	0.0311952	0.240544	1	7.16667	7.66667	3.6	Root; GO:0008150 biological_process; GO:0009058 biosynthetic process; IPR017678 CoB--CoM heterodisulphide reductase, subunit B
5865	2.61553	0.108361	0.380613	1	7.83333	5.83333	3.6	Root; GO:0008150 biological_process; GO:0009058 biosynthetic process; IPR005865 Tetrahydromethanopterin S-methyltransferase, subunit C
17679	2.39544	0.127429	0.402965	1	4.83333	4	2.4	Root; GO:0008150 biological_process; GO:0055114 oxidation-reduction process; IPR017679 Coenzyme F420 hydrogenase, subunit beta
3178	2.02537	0.168823	0.433929	1	7	5.83333	3.8	Root; GO:0008150 biological_process; GO:0009058 biosynthetic process; IPR003178 Methyl-coenzyme M reductase, gamma subunit
16212	1.99288	0.173138	0.434829	1	13.6667	13.6667	8.4	Root; GO:0008150 biological_process; GO:0009058 biosynthetic process; IPR016212 Methyl coenzyme M reductase, alpha subunit
19946	1.86697	0.1911	0.459226	1	5.83333	7.16667	3.8	Root; GO:0008150 biological_process; GO:0055114 oxidation-reduction process; IPR019946 5,10-methylenetetrahydromethanopterin reductase
3179	1.52922	0.250797	0.522119	1	14	11.1667	9.6	Root; GO:0008150 biological_process; GO:0009058 biosynthetic process; IPR003179 Methyl-coenzyme M reductase, beta subunit
17682	1.27827	0.309106	0.584229	1	7.33333	8.16667	3.8	Root; GO:0008150 biological_process; GO:0055114 oxidation-reduction process; IPR017682 Coenzyme F420 hydrogenase, subunit alpha
4460	1.02558	0.384018	0.642509	1	14	11.5	8	Root; GO:0008150 biological_process; GO:0055114 oxidation-reduction process; IPR004137 Hydroxylamine reductase/Ni-containing CO dehydrogenase; IPR004460 CO dehydrogenase/acetyl-CoA synthase complex alpha subunit
3901	0.388022	0.685471	0.84254	1	3.83333	3.66667	2.8	Root; GO:0008150 biological_process; GO:0009058 biosynthetic process; IPR003901 Methyl-coenzyme M reductase, protein D
23432	0.222793	0.803064	0.903791	1	4.66667	5.66667	4.6	Root; GO:0008150 biological_process; GO:0051186 cofactor metabolic process; IPR004461 CO dehydrogenase/acetyl-CoA synthase complex beta subunit; IPR023432 Acetyl-CoA decarbonylase/synthase complex subunit beta, archaeal
11904	0.0111009	0.988969	0.995018	1	26.1667	27	27.4	Root; GO:0008150 biological_process; GO:0009058 biosynthetic process; IPR011904 Acetate-CoA ligase
10067	18.0094	0.000134573	0.0645136	0.132824	9.33333	8.5	3	Root; GO:0008150 biological_process; GO:0006790 sulfur compound metabolic process; IPR010067 Aliphatic sulfonates-binding protein
11529	15.9273	0.000247296	0.0645136	0.244082	29	20.3333	14.4	Root; GO:0008150 biological_process; GO:0009058 biosynthetic process; IPR001057 Glutamate/acetylglutamate kinase; IPR005715 Glutamate 5-kinase/delta-1-pyrroline-5-carboxylate synthase; IPR011529 Glutamate 5-kinase
2817	15.8515	0.000253098	0.0645136	0.249808	31	28.6667	14.2	Root; GO:0008150 biological_process; GO:0009058 biosynthetic process; IPR002817 Phosphomethylpyrimidine synthase
27543	15.7457	0.000261453	0.0645136	0.258054	136.833	147.667	173	Root; GO:0008150 biological_process; GO:0009056 catabolic process; IPR027065 Lon protease; IPR004815 Lon protease, bacterial/eukaryotic-type; IPR027543 Lon protease, bacterial
304	13.5057	0.00054022	0.106639	0.533197	24.5	17	11.2	Root; GO:0008150 biological_process; GO:0009058 biosynthetic process; IPR000304 Pyrroline-5-carboxylate reductase
6062	11.9528	0.000937519	0.115818	0.925331	33.5	31.6667	17.8	Root; GO:0008150 biological_process; GO:0009058 biosynthetic process; IPR006062 Histidine biosynthesis
12134	11.8137	0.000987096	0.115818	0.974263	43	36.5	18.2	Root; GO:0008150 biological_process; GO:0009058 biosynthetic process; IPR012134 Glutamate-5-semialdehyde dehydrogenase
13345	11.3409	0.00117961	0.115818	1	14.5	7.66667	4.6	Root; GO:0008150 biological_process; GO:0009058 biosynthetic process; IPR013345 Ribonucleoside-triphosphate reductase, adenosylcobalamin-dependent
20823	11.3367	0.00118152	0.115818	1	27	35	49.8	Root; GO:0008150 biological_process; Other; IPR020823 Cell division protein FtsA
30855	10.7817	0.00146514	0.115818	1	18.3333	17.3333	10.2	Root; GO:0008150 biological_process; GO:0019538 protein metabolic process; IPR004408 Biotin--acetyl-CoA-carboxylase ligase; IPR030855 Bifunctional ligase/repressor BirA
2813	10.7006	0.00151279	0.115818	1	29.3333	25.5	14.4	Root; GO:0008150 biological_process; GO:0009058 biosynthetic process; IPR002813 Arginine biosynthesis protein ArgJ
30846	10.5817	0.00158582	0.115818	1	67.5	73	88.2	Root; GO:0008150 biological_process; GO:0009058 biosynthetic process; IPR030846 DNA primase DnaG, bacteria
22874	10.2649	0.00180111	0.115818	1	23.1667	22.5	11.4	Root; GO:0008150 biological_process; GO:0006520 cellular amino acid metabolic process; IPR002303 Valine-tRNA ligase; IPR022874 Valine-tRNA ligase, type 2
5260	10.1094	0.00191887	0.115818	1	91.8333	86.6667	62	Root; GO:0008150 biological_process; GO:0009058 biosynthetic process; IPR005260 Aspartate kinase, monofunctional class
10204	10.0719	0.00194853	0.115818	1	4.83333	7.33333	9.6	Root; GO:0008150 biological_process; GO:0055114 oxidation-reduction process; IPR010204 Na(+)-translocating NADH-quinone reductase subunit C
860	9.98716	0.00201763	0.115818	1	12	8.33333	4.4	Root; GO:0008150 biological_process; GO:0009058 biosynthetic process; IPR000860 Porphobilinogen deaminase
4541	9.70594	0.00226772	0.117802	1	114.167	131.667	140.2	Root; GO:0008150 biological_process; GO:0009058 biosynthetic process; IPR004541 Translation elongation factor EFTu/EF1A, bacterial/organelle
23590	9.5806	0.00239048	0.11797	1	8	12	4.8	Root; GO:0008150 biological_process; GO:0055114 oxidation-reduction process; IPR011777 Geranylgeranyl reductase family; IPR023590 Digeranylgeranylglycerophospholipid reductase
26410	9.36464	0.00262024	0.123151	1	22.6667	24.1667	9.4	Root; GO:0008150 biological_process; GO:0005975 carbohydrate metabolic process; IPR003674 Oligosaccharyl transferase, STT3 subunit; IPR026410 Oligosaccharyl transferase, archaeal
3699	8.92958	0.00316414	0.141955	1	70.1667	79.5	97	Root; GO:0008150 biological_process; GO:0009058 biosynthetic process; IPR003699 S-adenosylmethionine:tRNA ribosyltransferase-isomerase, QueA
3841	8.65205	0.0035784	0.149653	1	13.1667	15	6.8	Root; GO:0008150 biological_process; GO:0006810 transport; GO:0006811 ion transport; IPR003841 Sodium-dependent phosphate transport protein
14140	8.61152	0.00364392	0.149653	1	36.5	26.3333	15.4	Root; GO:0008150 biological_process; GO:0006259 DNA metabolic process; IPR014140 DNA helicase subunit AddB
3688	8.48946	0.00384975	0.149653	1	45.3333	35.8333	26	Root; GO:0008150 biological_process; GO:0000746 conjugation; IPR003688 Ti-type conjugative transfer system, TraG-like
20449	8.14035	0.00451581	0.159919	1	168.833	128.5	92.8	Root; GO:0008150 biological_process; Other; IPR020449 Transcription regulator HTH, AraC- type
100	8.03965	0.00473175	0.159919	1	7.5	8.66667	12.2	Root; GO:0008150 biological_process; GO:0016070 RNA metabolic process; IPR000100 Ribonuclease P
5668	8.02102	0.00477298	0.159919	1	12.3333	8.66667	3.8	Root; GO:0008150 biological_process; GO:0009058 biosynthetic process; IPR005668 2-isopropylmalate synthase
16202	7.84338	0.00518748	0.159919	1	10	18.8333	33.4	Root; GO:0008150 biological_process; GO:0009056 catabolic process; IPR016202 Deoxyribonuclease I
13344	7.7756	0.00535636	0.159919	1	115.333	139.667	157.6	Root; GO:0008150 biological_process; GO:0055114 oxidation-reduction process; IPR013344 Ribonucleotide reductase, adenosylcobalamin-dependent
11880	7.76001	0.00539611	0.159919	1	76.6667	60.3333	40.4	Root; GO:0008150 biological_process; GO:0009056 catabolic process; IPR011880 Phenylacetate-CoA ligase
4484	7.67106	0.00562932	0.159919	1	24.3333	19.5	12.8	Root; GO:0008150 biological_process; GO:0009058 biosynthetic process; IPR004484 Cobyrinic acid a,c-diamide synthase CbiA
5860	7.65564	0.0056709	0.159919	1	13.1667	12.5	5.4	Root; GO:0008150 biological_process; GO:0009058 biosynthetic process; IPR005860 L-threonine-O-3-phosphate decarboxylase
1679	7.48575	0.00615317	0.162814	1	119.333	119.5	139.4	Root; GO:0008150 biological_process; GO:0009058 biosynthetic process; IPR001679 NAD-dependent DNA ligase
30878	7.40778	0.00639008	0.162814	1	25.3333	24.6667	31.4	Root; GO:0008150 biological_process; GO:0006412 translation; IPR030878 Ribosomal protein L15
15937	7.28459	0.00678598	0.162814	1	176.5	151	106	Root; GO:0008150 biological_process; Other; IPR015937 Aconitase/isopropylmalate dehydratase
22695	7.25692	0.00687871	0.162814	1	46.6667	39.3333	25	Root; GO:0008150 biological_process; GO:0009058 biosynthetic process; IPR012131 Histidinol dehydrogenase; IPR022695 Histidinol dehydrogenase, monofunctional
5881	7.12742	0.00733241	0.162814	1	16.3333	10.3333	8	Root; GO:0008150 biological_process; GO:0009058 biosynthetic process; IPR005881 Serine O-acetyltransferase
23672	7.09224	0.00746152	0.162814	1	4.83333	5.83333	2	Root; GO:0008150 biological_process; GO:0006412 translation; IPR002171 Ribosomal protein L2; IPR023672 Ribosomal protein L2, archaeal-type
3474	7.0452	0.00763818	0.162814	1	17	18.6667	11.6	Root; GO:0008150 biological_process; GO:0006810 transport; GO:0006811 ion transport; IPR003474 Gluconate transporter
5259	7.01159	0.00776737	0.162814	1	96.5	101.167	122.6	Root; GO:0008150 biological_process; GO:0009058 biosynthetic process; IPR005259 Primosomal protein N'
5931	6.99498	0.00783215	0.162814	1	44.5	59	75.4	Root; GO:0008150 biological_process; GO:0009058 biosynthetic process; IPR005931 Delta-1-pyrroline-5-carboxylate dehydrogenase
6700	6.99112	0.00784727	0.162814	1	20.8333	24.3333	27.8	Root; GO:0008150 biological_process; GO:0016070 RNA metabolic process; IPR006700 Ribosomal RNA small subunit methyltransferase E
23016	6.93383	0.00807595	0.162814	1	26.3333	19.1667	13.8	Root; GO:0008150 biological_process; GO:0009058 biosynthetic process; IPR023016 Phosphoribosylformimino-5-aminoimidazole carboxamide ribotide isomerase
12136	6.9321	0.00808296	0.162814	1	26.1667	35	46.8	Root; GO:0008150 biological_process; GO:0055114 oxidation-reduction process; IPR012136 NADP transhydrogenase, beta subunit
4404	6.86464	0.00836233	0.165072	1	75	65.3333	45	Root; GO:0008150 biological_process; Other; IPR000581 Dihydroxy-acid/6-phosphogluconate dehydratase; IPR004404 Dihydroxy-acid dehydratase
3837	6.65402	0.00930813	0.173244	1	5.66667	5.83333	3	Root; GO:0008150 biological_process; Other; IPR003837 Aspartyl/glutamyl-tRNA(Asn/Gln) amidotransferase, C subunit
13369	6.63548	0.0093971	0.173244	1	36.8333	30.6667	23.8	Root; GO:0008150 biological_process; GO:0006810 transport; GO:0009306 protein secretion; IPR013369 Type II secretion system GspE
23434	6.61464	0.00949826	0.173244	1	42.6667	30.6667	20.8	Root; GO:0008150 biological_process; GO:0009058 biosynthetic process; IPR001518 Argininosuccinate synthase; IPR023434 Argininosuccinate synthase, type 1 subfamily
20672	6.59195	0.00960978	0.173244	1	7.83333	8.16667	3.8	Root; GO:0008150 biological_process; Other; IPR004788 Ribose 5-phosphate isomerase, type A; IPR020672 Ribose-5-phosphate isomerase, type A, subgroup
5234	6.55139	0.00981295	0.173244	1	18.6667	17.8333	13	Root; GO:0008150 biological_process; Other; IPR005234 Chromosome segregation/condensation protein ScpB
24902	6.54024	0.00986966	0.173244	1	3	4.5	2.2	Root; GO:0008150 biological_process; GO:0009058 biosynthetic process; IPR024902 FAD synthase RibL
5876	6.49597	0.0100985	0.173244	1	14.5	18.8333	9.4	Root; GO:0008150 biological_process; GO:0006810 transport; GO:0006811 ion transport; IPR005876 Cobalt transport protein ATP-binding subunit
5940	6.47573	0.0102052	0.173244	1	22	16.8333	11	Root; GO:0008150 biological_process; GO:0009058 biosynthetic process; IPR005940 Anthranilate phosphoribosyl transferase
10230	6.42457	0.0104806	0.173244	1	20	24.5	36.8	Root; GO:0008150 biological_process; GO:0006810 transport; IPR010230 FeS cluster assembly SUF system, ATPase SufC
12846	6.41526	0.0105316	0.173244	1	71.8333	57.3333	45.8	Root; GO:0008150 biological_process; GO:0009058 biosynthetic process; IPR012846 Acetolactate synthase, large subunit, biosynthetic
5790	6.3112	0.0111216	0.179951	1	20.3333	19.5	28.4	Root; GO:0008150 biological_process; GO:0009058 biosynthetic process; IPR005790 DNA polymerase III, delta subunit
5627	6.2245	0.0116421	0.185335	1	9	13.3333	21.8	Root; GO:0008150 biological_process; GO:0042592 homeostatic process; IPR005627 Copper homeostasis protein CutC
23993	6.18107	0.0119133	0.185583	1	5.33333	3.66667	2.6	Root; GO:0008150 biological_process; GO:0016070 RNA metabolic process; IPR023993 S-adenosyl-L-methionine-dependent tRNA 4-demethylwyosine synthase TYW1
19942	6.05078	0.0127712	0.185583	1	26.1667	19.6667	13	Root; GO:0008150 biological_process; GO:0009058 biosynthetic process; IPR019942 LL-diaminopimelate aminotransferase
10960	6.01925	0.0129893	0.185583	1	30.8333	21.1667	13	Root; GO:0008150 biological_process; GO:0055114 oxidation-reduction process; IPR010960 Flavocytochrome c
5982	5.99946	0.0131283	0.185583	1	45.1667	56.3333	66	Root; GO:0008150 biological_process; GO:0055114 oxidation-reduction process; IPR000103 Pyridine nucleotide-disulphide oxidoreductase, class-II; IPR005982 Thioredoxin reductase
6321	5.98969	0.0131976	0.185583	1	54.8333	49.3333	41.6	Root; GO:0008150 biological_process; GO:0006810 transport; IPR006321 Pilus retraction protein PilT
20930	5.96446	0.0133785	0.185583	1	34.5	39.8333	47.2	Root; GO:0008150 biological_process; GO:0006412 translation; IPR002132 Ribosomal protein L5; IPR020930 Ribosomal protein L5, bacterial-type
5738	5.94513	0.0135189	0.185583	1	41.5	33.3333	23.4	Root; GO:0008150 biological_process; GO:0016043 cellular component organization; IPR000380 DNA topoisomerase, type IA; IPR005738 DNA topoisomerase III
4468	5.93744	0.0135753	0.185583	1	98	113.833	123.2	Root; GO:0008150 biological_process; GO:0009058 biosynthetic process; IPR004468 CTP synthase
3203	5.92674	0.0136541	0.185583	1	7.33333	4.5	4.4	Root; GO:0008150 biological_process; GO:0009058 biosynthetic process; IPR003203 Cobinamide kinase/cobinamide phosphate guanyltransferase
3835	5.916	0.0137338	0.185583	1	21.5	24.3333	29.4	Root; GO:0008150 biological_process; GO:0009058 biosynthetic process; IPR003835 Glycosyl transferase, family 19
27488	5.8772	0.014026	0.185583	1	5.5	4.83333	2.8	Root; GO:0008150 biological_process; GO:0006412 translation; IPR005703 Ribosomal protein S3, eukaryotic/archaeal; IPR027488 Ribosomal protein S3, archaeal
23498	5.86727	0.0141021	0.185583	1	21.6667	15.8333	13.8	Root; GO:0008150 biological_process; GO:0006810 transport; GO:0006811 ion transport; IPR003689 Zinc/iron permease; IPR023498 Zinc transporter ZupT
4421	5.8204	0.0144669	0.187879	1	17.6667	15.3333	7.6	Root; GO:0008150 biological_process; GO:0019538 protein metabolic process; IPR004421 Carbamoyltransferase, HypF-type
4392	5.70911	0.0153773	0.194898	1	8.66667	6.5	4	Root; GO:0008150 biological_process; GO:0016043 cellular component organization; IPR004392 Hydrogenase accessory protein HypB
4475	5.66986	0.0157139	0.194898	1	23.6667	23.1667	11.6	Root; GO:0008150 biological_process; GO:0009058 biosynthetic process; IPR004475 DNA polymerase II large subunit DP2
556	5.65445	0.0158483	0.194898	1	7.16667	3.16667	2.4	Root; GO:0008150 biological_process; GO:0005975 carbohydrate metabolic process; IPR000556 Glycoside hydrolase, 48F
6000	5.63846	0.0159892	0.194898	1	32.3333	29.6667	20	Root; GO:0008150 biological_process; GO:0005975 carbohydrate metabolic process; IPR000577 Carbohydrate kinase, FGGY; IPR006000 Xylulokinase
4548	5.63785	0.0159947	0.194898	1	25.6667	18.1667	14	Root; GO:0008150 biological_process; GO:0016043 cellular component organization; IPR004548 Peptide chain release factor 3
10139	5.6092	0.0162507	0.195604	1	10.3333	9.83333	4.6	Root; GO:0008150 biological_process; GO:0009058 biosynthetic process; IPR010139 Imidazole glycerol phosphate synthase, subunit H
15990	5.58268	0.016492	0.196116	1	10.3333	10	1.4	Root; GO:0008150 biological_process; GO:0005975 carbohydrate metabolic process; IPR007666 ADP-specific phosphofructokinase/glucokinase; IPR015990 ADP-specific phosphofructokinase/glucokinase, archaeal
5734	5.53111	0.016973	0.19652	1	15	12.6667	8.4	Root; GO:0008150 biological_process; GO:0016043 cellular component organization; IPR005734 DNA topoisomerase VI, subunit B
3824	5.52789	0.0170036	0.19652	1	43.6667	41.6667	51.6	Root; GO:0008150 biological_process; Other; IPR003824 Undecaprenyl-diphosphatase UppP
6275	5.51534	0.0171233	0.19652	1	147.667	108.5	90.2	Root; GO:0008150 biological_process; GO:0006807 nitrogen compound metabolic process; IPR006275 Carbamoyl-phosphate synthase, large subunit
3811	5.47976	0.017468	0.198108	1	17.5	21.5	25.2	Root; GO:0008150 biological_process; GO:0009058 biosynthetic process; IPR003811 Glycerol-3-phosphate acyltransferase, PlsY
22923	5.45012	0.0177612	0.198108	1	7.66667	7.5	3.6	Root; GO:0008150 biological_process; GO:0016070 RNA metabolic process; IPR002905 tRNA methyltransferase, Trm1; IPR022923 tRNA (guanine(26)-N(2))-dimethyltransferase, archaeal and bacterial
13440	5.43987	0.0178638	0.198108	1	12.6667	15	25	Root; GO:0008150 biological_process; GO:0006520 cellular amino acid metabolic process; IPR011166 Beta-eliminating lyase family; IPR013440 Tryptophanase
438	5.41816	0.0180836	0.198317	1	59.1667	77.6667	78.6	Root; GO:0008150 biological_process; GO:0009058 biosynthetic process; IPR000438 Acetyl-CoA carboxylase carboxyl transferase, beta subunit
30921	5.36984	0.0185839	0.201564	1	23.1667	26	34.8	Root; GO:0008150 biological_process; GO:0006810 transport; IPR030921 LPS export ABC transporter, ATP-binding protein LptB
5706	5.32779	0.0190323	0.202962	1	51.1667	55.1667	61.6	Root; GO:0008150 biological_process; GO:0006412 translation; IPR001865 Ribosomal protein S2; IPR005706 Ribosomal protein S2, bacteria/mitochondria/plastid
10194	5.28648	0.0194847	0.202962	1	6.83333	5.66667	3.4	Root; GO:0008150 biological_process; GO:0016310 phosphorylation; IPR010194 Anti-sigma F factor
26019	5.28461	0.0195055	0.202962	1	33.5	41.3333	48.8	Root; GO:0008150 biological_process; GO:0005975 carbohydrate metabolic process; IPR000056 Ribulose-phosphate 3-epimerase-like; IPR026019 Ribulose-phosphate 3-epimerase
11851	5.25511	0.0198365	0.202962	1	13.6667	9	5.4	Root; GO:0008150 biological_process; GO:0006810 transport; IPR001734 Sodium/solute symporter; IPR019900 Sodium/solute symporter, subgroup; IPR011851 Sodium/proline symporter
20667	5.23168	0.020104	0.202962	1	89	93.3333	110.2	Root; GO:0008150 biological_process; GO:0006259 DNA metabolic process; IPR002099 DNA mismatch repair protein family; IPR020667 DNA mismatch repair protein, MutL
4803	5.22853	0.0201403	0.202962	1	80.1667	86.3333	95.8	Root; GO:0008150 biological_process; GO:0009058 biosynthetic process; IPR002616 tRNA-guanine(15) transglycosylase-like; IPR004803 Queuine tRNA-ribosyltransferase
7692	5.22749	0.0201523	0.202962	1	89	92.6667	102	Root; GO:0008150 biological_process; GO:0009058 biosynthetic process; IPR007692 DNA helicase, DnaB type
25708	5.19991	0.0204733	0.203883	1	4	5.83333	8.6	Root; GO:0008150 biological_process; GO:0006950 response to stress; IPR025708 Heat shock protein 15
10161	5.18437	0.0206569	0.203883	1	31.1667	36.1667	54.2	Root; GO:0008150 biological_process; Other; IPR002933 Peptidase M20; IPR010161 Peptidase M20B, tripeptide aminopeptidase
12382	5.12528	0.0213719	0.208852	1	8	5	3.4	Root; GO:0008150 biological_process; GO:0009058 biosynthetic process; IPR012382 Precorrin-2 C(20)-methyltransferase
20831	5.10263	0.0216535	0.209529	1	103	126.833	144.2	Root; GO:0008150 biological_process; GO:0055114 oxidation-reduction process; IPR020831 Glyceraldehyde/Erythrose phosphate dehydrogenase family
178	4.91098	0.0242133	0.229793	1	135.167	133.833	153.6	Root; GO:0008150 biological_process; Other; IPR000178 Translation initiation factor aIF-2, bacterial-like
5771	4.88389	0.0246023	0.231218	1	24.3333	22.6667	14.2	Root; GO:0008150 biological_process; GO:0006807 nitrogen compound metabolic process; IPR005771 UTP--glucose-1-phosphate uridylyltransferase, bacterial/archaeal-type
19881	4.85976	0.0249549	0.231218	1	8.16667	10.6667	4	Root; GO:0008150 biological_process; GO:0009058 biosynthetic process; IPR019881 Diaminopimelate aminotransferase, DapL, Desulfovibrio-type
6258	4.82321	0.0254999	0.231218	1	88.8333	77.5	98.8	Root; GO:0008150 biological_process; GO:0055114 oxidation-reduction process; IPR006258 Dihydrolipoamide dehydrogenase
11815	4.80379	0.0257951	0.231218	1	11.5	24	42.8	Root; GO:0008150 biological_process; GO:0009058 biosynthetic process; IPR011815 Penicillin-binding protein 1C
4602	4.78576	0.0260725	0.231218	1	258	276.167	303.8	Root; GO:0008150 biological_process; GO:0006259 DNA metabolic process; IPR004602 UvrABC system subunit A
14225	4.7757	0.0262288	0.231218	1	14.8333	10.3333	7.2	Root; GO:0008150 biological_process; GO:0043934 sporulation; IPR013486 Sporulation stage II protein D, amidase enhancer LytB; IPR014225 Sporulation stage II, protein D firmicutes
10078	4.77139	0.0262961	0.231218	1	6.66667	4	2.2	Root; GO:0008150 biological_process; Other; IPR010078 Pur operon repressor
3538	4.74102	0.026776	0.231218	1	15	14.5	19.2	Root; GO:0008150 biological_process; GO:0006810 transport; IPR003538 Gram-negative bacterial TonB protein
4499	4.73513	0.0268702	0.231218	1	83.5	99.5	102.6	Root; GO:0008150 biological_process; GO:0006520 cellular amino acid metabolic process; IPR002316 Proline-tRNA ligase, class IIa; IPR004499 Proline-tRNA ligase, class IIa, archaeal-type
1474	4.73434	0.0268829	0.231218	1	11.6667	16	22	Root; GO:0008150 biological_process; GO:0009058 biosynthetic process; IPR001474 GTP cyclohydrolase I
4439	4.72483	0.0270359	0.231218	1	14.1667	11	6.2	Root; GO:0008150 biological_process; GO:0055114 oxidation-reduction process; IPR001804 Isocitrate and isopropylmalate dehydrogenases family; IPR004439 Isocitrate dehydrogenase NADP-dependent, dimeric, prokaryotic
5338	4.70536	0.0273522	0.231218	1	9.33333	14.5	21.2	Root; GO:0008150 biological_process; GO:0006807 nitrogen compound metabolic process; IPR005338 Anhydro-N-acetylmuramic acid kinase
22463	4.7019	0.0274089	0.231218	1	9	5.16667	4.6	Root; GO:0008150 biological_process; GO:0005975 carbohydrate metabolic process; IPR017583 Tagatose/fructose phosphokinase; IPR022463 Fructose 1-phosphate kinase
8257	4.64249	0.028403	0.237574	1	16.6667	25	33.4	Root; GO:0008150 biological_process; GO:0019538 protein metabolic process; IPR008257 Renal dipeptidase family
4554	4.62561	0.028693	0.237897	1	6.66667	7.16667	1.8	Root; GO:0008150 biological_process; GO:0051186 cofactor metabolic process; IPR002202 Hydroxymethylglutaryl-CoA reductase, class I/II; IPR004554 Hydroxymethylglutaryl-CoA reductase, eukaryotic/arcaheal type
5746	4.60135	0.0291156	0.237897	1	46	60.6667	61	Root; GO:0008150 biological_process; GO:0042592 homeostatic process; IPR005746 Thioredoxin
12089	4.59296	0.0292635	0.237897	1	27.6667	23	19	Root; GO:0008150 biological_process; GO:0016070 RNA metabolic process; IPR012089 2-thiocytidine tRNA biosynthesis protein, TtcA
9308	4.58317	0.029437	0.237897	1	16.3333	13.3333	9	Root; GO:0008150 biological_process; GO:0005975 carbohydrate metabolic process; IPR009308 Rhamnose isomerase
3964	4.56085	0.0298372	0.237897	1	28.3333	31.1667	40.4	Root; GO:0008150 biological_process; GO:0006520 cellular amino acid metabolic process; IPR003964 Carbamate kinase
16204	4.55805	0.0298878	0.237897	1	23.3333	17.3333	12.8	Root; GO:0008150 biological_process; GO:0006520 cellular amino acid metabolic process; IPR016204 Homoserine dehydrogenase
3710	4.54366	0.0301495	0.238061	1	16	12.5	8.4	Root; GO:0008150 biological_process; GO:0009058 biosynthetic process; IPR003710 Ketopantoate reductase ApbA/PanE
20791	4.50914	0.0307884	0.239482	1	24.5	22.8333	13	Root; GO:0008150 biological_process; GO:0006520 cellular amino acid metabolic process; IPR004493 Leucyl-tRNA synthetase, class Ia, archaeal/eukaryotic cytosolic; IPR020791 Leucine-tRNA ligase, archaeal
1469	4.44109	0.0320932	0.24555	1	5.33333	5.33333	2.4	Root; GO:0008150 biological_process; GO:0009058 biosynthetic process; IPR001469 ATPase, F1 complex, delta/epsilon subunit
11832	4.38966	0.0331217	0.249695	1	20.3333	14.8333	12	Root; GO:0008150 biological_process; GO:0009058 biosynthetic process; IPR011832 Glucose-1-phosphate adenylyltransferase, GlgD subunit
19906	4.38871	0.0331409	0.249695	1	36.5	44.5	46.4	Root; GO:0008150 biological_process; GO:0006412 translation; IPR000702 Ribosomal protein L6; IPR019906 Ribosomal protein L6, bacterial-type
7069	4.36314	0.0336666	0.249937	1	69.8333	57.3333	39.8	Root; GO:0008150 biological_process; GO:0006259 DNA metabolic process; IPR007069 Transposase, IS801/IS1294
14322	4.36251	0.0336795	0.249937	1	17.1667	12.6667	8.2	Root; GO:0008150 biological_process; GO:0009058 biosynthetic process; IPR014322 RNA polymerase sigma-B/F/G type
4527	4.32692	0.0344274	0.251996	1	95.1667	107.5	112.4	Root; GO:0008150 biological_process; GO:0006520 cellular amino acid metabolic process; IPR000924 Glutamyl/glutaminyl-tRNA synthetase; IPR004527 Glutamate-tRNA ligase, bacterial/mitochondrial
5729	4.32503	0.0344675	0.251996	1	3.16667	1	2	Root; GO:0008150 biological_process; GO:0006412 translation; IPR001848 Ribosomal protein S10; IPR005729 Ribosomal protein S10, eukaryotic/archaeal
14201	4.30008	0.0350038	0.254035	1	30.6667	22.6667	15.4	Root; GO:0008150 biological_process; GO:0043934 sporulation; IPR014201 Sporulation stage IV, protein A
870	4.26346	0.0358083	0.257977	1	9.33333	7	4.6	Root; GO:0008150 biological_process; GO:0006520 cellular amino acid metabolic process; IPR000870 Homoserine kinase
23048	4.24345	0.0362567	0.259315	1	7	4.5	2.6	Root; GO:0008150 biological_process; GO:0055114 oxidation-reduction process; IPR023048 NADH-azoreductase, FMN-dependent
4661	4.22002	0.0367902	0.259443	1	13.5	14.8333	8.4	Root; GO:0008150 biological_process; GO:0005975 carbohydrate metabolic process; IPR004661 L-ribulose-5-phosphate 4-epimerase
10048	4.20369	0.0371671	0.259443	1	57.1667	60.8333	114	Root; GO:0008150 biological_process; GO:0055114 oxidation-reduction process; IPR004137 Hydroxylamine reductase/Ni-containing CO dehydrogenase; IPR010048 Hydroxylamine reductase
27022	4.18845	0.037523	0.259443	1	18	14	10.4	Root; GO:0008150 biological_process; GO:0006810 transport; IPR027022 ABC transporter permease protein, BceB-type
4535	4.186	0.0375806	0.259443	1	16.5	24.8333	34.4	Root; GO:0008150 biological_process; GO:0009058 biosynthetic process; IPR004535 Translation elongation factor, selenocysteine-specific
1911	4.17335	0.0378793	0.259443	1	8.33333	7	11.6	Root; GO:0008150 biological_process; GO:0006412 translation; IPR001911 Ribosomal protein S21
11834	4.16691	0.0380324	0.259443	1	82.8333	88	111.8	Root; GO:0008150 biological_process; GO:0005975 carbohydrate metabolic process; IPR000811 Glycosyl transferase, family 35; IPR011834 Alpha-glucan phosphorylase
4131	4.16347	0.0381148	0.259443	1	145.833	162.833	135	Root; GO:0008150 biological_process; GO:0006810 transport; GO:0006811 ion transport; IPR004131 Pyrophosphate-energised proton pump
10231	4.13676	0.0387592	0.261308	1	32.1667	45.1667	62.6	Root; GO:0008150 biological_process; GO:0009058 biosynthetic process; IPR000825 SUF system FeS cluster assembly, SufBD; IPR010231 SUF system FeS cluster assembly, SufB
5810	4.11378	0.0393236	0.261308	1	13	18.1667	31.8	Root; GO:0008150 biological_process; Other; IPR005810 Succinyl-CoA ligase, alpha subunit
18320	4.1124	0.0393578	0.261308	1	135	148.333	169.2	Root; GO:0008150 biological_process; GO:0009058 biosynthetic process; IPR002298 DNA polymerase A; IPR018320 DNA polymerase 1
2133	4.10878	0.0394477	0.261308	1	102.5	113.167	125.6	Root; GO:0008150 biological_process; GO:0009058 biosynthetic process; IPR002133 S-adenosylmethionine synthetase
3766	4.08711	0.0399905	0.261914	1	31.6667	24.8333	19.4	Root; GO:0008150 biological_process; GO:0005975 carbohydrate metabolic process; IPR003766 Uronate isomerase
4644	4.07679	0.0402521	0.261914	1	13.3333	14.8333	25.6	Root; GO:0008150 biological_process; GO:0009058 biosynthetic process; IPR004644 Iron-sulphur-dependent L-serine dehydratase single chain form
5670	4.07312	0.0403457	0.261914	1	40.6667	47	50.6	Root; GO:0008150 biological_process; GO:0006810 transport; GO:0006811 ion transport; IPR005670 Phosphate transport system permease protein 1
15944	4.06315	0.0406007	0.261914	1	25.6667	31.8333	45	Root; GO:0008150 biological_process; GO:0006520 cellular amino acid metabolic process; IPR006194 Glycine-tRNA synthetase, heterodimeric; IPR015944 Glycine-tRNA ligase, beta subunit
22878	4.02701	0.0415414	0.266243	1	107.833	121.833	136.8	Root; GO:0008150 biological_process; GO:0009117 nucleotide metabolic process; GO:0046034 ATP metabolic process; IPR022878 V-type ATP synthase catalytic alpha chain
802	3.98359	0.0427047	0.271932	1	37.1667	48.3333	31.8	Root; GO:0008150 biological_process; GO:0006810 transport; GO:0006811 ion transport; IPR000802 Arsenical pump membrane protein, ArsB
19969	3.93855	0.0439509	0.278074	1	17	12.6667	8.2	Root; GO:0008150 biological_process; GO:0006351 transcription, DNA-templated; IPR019969 DNA-directed RNA polymerase subunit B (Rpo2)
5697	3.92183	0.044424	0.279277	1	18.5	16.8333	12.2	Root; GO:0008150 biological_process; GO:0009058 biosynthetic process; IPR005697 Homoserine O-succinyltransferase
4609	3.89498	0.0451961	0.282332	1	94.1667	104.667	115.8	Root; GO:0008150 biological_process; GO:0006259 DNA metabolic process; IPR004609 ATP-dependent DNA helicase RecG
6005	3.83712	0.0469125	0.290342	1	10.3333	6	5	Root; GO:0008150 biological_process; GO:0009058 biosynthetic process; IPR006005 Glutamate synthase, NADH/NADPH, small subunit 1
6478	3.8243	0.0473027	0.290342	1	62.5	81.6667	71	Root; GO:0008150 biological_process; GO:0055114 oxidation-reduction process; IPR006478 Formate dehydrogenase, alpha subunit
5809	3.82044	0.0474211	0.290342	1	10.3333	13.5	32.2	Root; GO:0008150 biological_process; Other; IPR005809 Succinyl-CoA synthetase, beta subunit
2187	3.81284	0.0476549	0.290342	1	26.8333	24.1667	18.2	Root; GO:0008150 biological_process; Other; IPR002187 Nitrogen regulatory protein PII
30678	3.79399	0.0482406	0.292107	1	236.333	222.333	165.4	Root; GO:0008150 biological_process; GO:0006810 transport; IPR030678 Peptide/nickel binding protein, MppA-type
1189	3.75154	0.0495898	0.296776	1	31.8333	28.8333	41	Root; GO:0008150 biological_process; GO:0055114 oxidation-reduction process; IPR001189 Manganese/iron superoxide dismutase
3784	3.7261	0.0504188	0.296869	1	10.3333	9.66667	5.8	Root; GO:0008150 biological_process; GO:0006810 transport; GO:0006811 ion transport; IPR003784 BioY protein
12757	3.7227	0.0505309	0.296869	1	10.1667	8.66667	5.6	Root; GO:0008150 biological_process; GO:0006351 transcription, DNA-templated; IPR012757 DNA-directed RNA polymerase subunit A''
5722	3.67208	0.0522328	0.302534	1	53.6667	54.3333	65.6	Root; GO:0008150 biological_process; GO:0009058 biosynthetic process; IPR005722 ATPase, F1 complex, beta subunit
28612	3.67068	0.0522807	0.302534	1	135	145.167	151.6	Root; GO:0008150 biological_process; GO:0016043 cellular component organization; IPR000380 DNA topoisomerase, type IA; IPR028612 DNA topoisomerase I, type IA
1731	3.6649	0.0524792	0.302534	1	14.8333	10.5	9.4	Root; GO:0008150 biological_process; GO:0009058 biosynthetic process; IPR001731 Delta-aminolevulinic acid dehydratase
11297	3.65702	0.0527515	0.302534	1	8.5	6	3.8	Root; GO:0008150 biological_process; GO:0006810 transport; IPR011297 Phosphotransferase system, beta-glucoside-specific IIABC component
8310	3.63593	0.0534882	0.302534	1	4.66667	5	2.6	Root; GO:0008150 biological_process; GO:0009058 biosynthetic process; IPR008310 UPF0735 ACT domain-containing protein
23029	3.63467	0.0535324	0.302534	1	4.33333	3.66667	1.8	Root; GO:0008150 biological_process; GO:0006412 translation; IPR000589 Ribosomal protein S15; IPR023029 Ribosomal protein S15P
4604	3.62384	0.0539156	0.302534	1	62.1667	61	69.6	Root; GO:0008150 biological_process; GO:0006259 DNA metabolic process; IPR004604 DNA recombination/repair protein RecN
23642	3.61803	0.0541226	0.302534	1	7.16667	7.16667	3.6	Root; GO:0008150 biological_process; GO:0009058 biosynthetic process; IPR007238 DNA primase large subunit, eukaryotic/archaeal; IPR023642 DNA primase large subunit PriL
7691	3.60382	0.0546324	0.302534	1	26.6667	35	47.8	Root; GO:0008150 biological_process; GO:0009058 biosynthetic process; IPR007691 UDP-3-O-[3-hydroxymyristoyl] glucosamine N-acyltransferase LpxD
11864	3.60101	0.0547339	0.302534	1	37.5	35.1667	45.2	Root; GO:0008150 biological_process; GO:0006810 transport; GO:0006811 ion transport; IPR011864 Phosphate ABC transporter, permease protein PstC
1668	3.59733	0.0548669	0.302534	1	19	12.3333	11.8	Root; GO:0008150 biological_process; GO:0006259 DNA metabolic process; IPR001668 Plasmid recombination enzyme
5920	3.58874	0.0551792	0.302566	1	33.1667	37.3333	51.2	Root; GO:0008150 biological_process; GO:0009056 catabolic process; IPR005920 Imidazolonepropionase
10354	3.57534	0.0556704	0.303315	1	4.5	2.33333	1.8	Root; GO:0008150 biological_process; GO:0006629 lipid metabolic process; IPR010354 Oleate hydratase
11805	3.54907	0.0566484	0.303315	1	73.8333	83.5	85.8	Root; GO:0008150 biological_process; GO:0016070 RNA metabolic process; IPR004476 Ribonuclease II/ribonuclease R; IPR011805 Ribonuclease R
10136	3.54229	0.0569039	0.303315	1	5.5	5.16667	2.2	Root; GO:0008150 biological_process; GO:0009058 biosynthetic process; IPR010136 N-acetyl-gamma-glutamyl-phosphate reductase, type 2
4543	3.54211	0.0569105	0.303315	1	18	18.1667	10.2	Root; GO:0008150 biological_process; GO:0009058 biosynthetic process; IPR004543 Translation elongation factor EFG/EF2, archaeal
3728	3.51878	0.0578	0.303315	1	20.3333	20.8333	15.2	Root; GO:0008150 biological_process; Other; IPR003728 Ribosome maturation factor RimP
4605	3.51073	0.0581107	0.303315	1	61.6667	70	79.8	Root; GO:0008150 biological_process; GO:0006259 DNA metabolic process; IPR004605 DNA helicase, Holliday junction RuvB type
23019	3.50628	0.0582834	0.303315	1	6.33333	8.66667	4.6	Root; GO:0008150 biological_process; GO:0009058 biosynthetic process; IPR023019 Histidine biosynthesis bifunctional protein HisIE
31155	3.50356	0.0583889	0.303315	1	12.3333	19.5	25.4	Root; GO:0008150 biological_process; GO:0006810 transport; IPR001734 Sodium/solute symporter; IPR019900 Sodium/solute symporter, subgroup; IPR031155 Urea active transporter
6335	3.48987	0.0589243	0.304493	1	3	5.66667	2	Root; GO:0008150 biological_process; GO:0009058 biosynthetic process; IPR006335 Glutathione biosynthesis bifunctional protein GshAB
13483	3.46659	0.059848	0.304739	1	9.5	6.33333	6.8	Root; GO:0008150 biological_process; GO:0009058 biosynthetic process; IPR013483 Molybdenum cofactor biosynthesis protein A
4459	3.44716	0.0606314	0.304739	1	19.8333	17.5	10.6	Root; GO:0008150 biological_process; GO:0009058 biosynthetic process; IPR004459 Cobyric acid synthase CobQ
24893	3.44427	0.0607492	0.304739	1	8.66667	7.66667	4.4	Root; GO:0008150 biological_process; GO:0009058 biosynthetic process; IPR001348 ATP phosphoribosyltransferase HisG; IPR024893 ATP phosphoribosyltransferase HisG, short form
23035	3.43835	0.0609905	0.304739	1	25.1667	27.6667	32	Root; GO:0008150 biological_process; GO:0006412 translation; IPR000754 Ribosomal protein S9; IPR023035 Ribosomal protein S9, bacterial/plastid
11822	3.43057	0.0613097	0.304739	1	40.8333	30.8333	26.2	Root; GO:0008150 biological_process; GO:0009058 biosynthetic process; IPR011822 Cobalamin-dependent methionine synthase
26660	3.42462	0.0615553	0.304739	1	14.1667	10.3333	7.8	Root; GO:0008150 biological_process; GO:0009058 biosynthetic process; IPR026660 Phosphoribosyl-AMP cyclohydrolase
3804	3.42158	0.061681	0.304739	1	9	5.16667	4	Root; GO:0008150 biological_process; GO:0006810 transport; GO:0006811 ion transport; IPR003804 L-lactate permease
5762	3.421	0.0617049	0.304739	1	54.8333	60.6667	70.6	Root; GO:0008150 biological_process; GO:0051301 cell division; IPR005762 UDP-N-acetylmuramoylalanine-D-glutamate ligase
3761	3.41205	0.0620774	0.304739	1	3.83333	6.66667	8	Root; GO:0008150 biological_process; GO:0009056 catabolic process; IPR003761 Exonuclease VII, small subunit
706	3.40863	0.0622203	0.304739	1	31.6667	31.6667	21	Root; GO:0008150 biological_process; GO:0009058 biosynthetic process; IPR000706 N-acetyl-gamma-glutamyl-phosphate reductase, type 1
14620	3.4051	0.0623681	0.304739	1	7.33333	5.5	2.8	Root; GO:0008150 biological_process; GO:0009058 biosynthetic process; IPR014620 Thymidylate synthase, archaea
15868	3.38768	0.0631038	0.305595	1	7	11.1667	16.4	Root; GO:0008150 biological_process; GO:0006520 cellular amino acid metabolic process; IPR015868 Glutaminase
5246	3.37881	0.0634824	0.305595	1	9.83333	10.5	5.2	Root; GO:0008150 biological_process; GO:0006520 cellular amino acid metabolic process; IPR005246 O-phosphoseryl-tRNA(Cys) ligase
1001	3.37491	0.0636498	0.305595	1	62.8333	60.8333	71.4	Root; GO:0008150 biological_process; GO:0009058 biosynthetic process; IPR001001 DNA polymerase III, beta chain
11542	3.37007	0.0638577	0.305595	1	15.5	20.5	25	Root; GO:0008150 biological_process; GO:0009058 biosynthetic process; IPR000825 SUF system FeS cluster assembly, SufBD; IPR011542 SUF system FeS cluster assembly, SufD
5892	3.36467	0.0640913	0.305595	1	15.8333	10.6667	10	Root; GO:0008150 biological_process; GO:0006810 transport; GO:0006811 ion transport; IPR005892 Glycine betaine transport ATP-binding subunit
5760	3.32159	0.0659873	0.312349	1	8.5	12.6667	21	Root; GO:0008150 biological_process; GO:0006259 DNA metabolic process; IPR005760 A/G-specific adenine glycosylase MutY
24107	3.31817	0.0661407	0.312349	1	66.1667	63	79.4	Root; GO:0008150 biological_process; GO:0006520 cellular amino acid metabolic process; IPR002305 Aminoacyl-tRNA synthetase, class Ic; IPR002307 Tyrosine-tRNA ligase; IPR024088 Tyrosine-tRNA ligase, bacterial-type; IPR024107 Tyrosine-tRNA ligase, bacterial-type, type 1
2748	3.29911	0.0670023	0.314911	1	11.3333	8	5.2	Root; GO:0008150 biological_process; GO:0009058 biosynthetic process; IPR002748 Cobalt-precorrin-5B C(1)-methyltransferase CbiD
5855	3.2886	0.0674828	0.315666	1	99	91	67.8	Root; GO:0008150 biological_process; GO:0009058 biosynthetic process; IPR005855 Glucosamine-fructose-6-phosphate aminotransferase, isomerising
5912	3.26863	0.0684065	0.318276	1	6.5	6.83333	3	Root; GO:0008150 biological_process; GO:0016070 RNA metabolic process; IPR005912 tRNA pseudouridine synthase, Pus10
4811	3.26266	0.0686858	0.318276	1	125.167	140.5	161.6	Root; GO:0008150 biological_process; GO:0009117 nucleotide metabolic process; IPR004811 RelA/SpoT family
6274	3.2472	0.0694146	0.318661	1	29.5	22.3333	18.4	Root; GO:0008150 biological_process; GO:0009058 biosynthetic process; IPR006274 Carbamoyl-phosphate synthase, small subunit
18393	3.22913	0.0702774	0.320958	1	9.5	11.6667	15.4	Root; GO:0008150 biological_process; GO:0022900 electron transport chain; IPR018393 NADH-plastoquinone oxidoreductase, chain 5 subgroup
4789	3.21697	0.070865	0.320958	1	20.3333	14.5	13.4	Root; GO:0008150 biological_process; GO:0009058 biosynthetic process; IPR004789 Acetolactate synthase, small subunit
4814	3.20347	0.071524	0.320958	1	23.8333	29.8333	38	Root; GO:0008150 biological_process; GO:0006810 transport; IPR004813 Oligopeptide transporter, OPT superfamily; IPR004814 Oligopeptide transporter OPT
14311	3.20026	0.0716815	0.320958	1	13	20.6667	28.4	Root; GO:0008150 biological_process; GO:0009056 catabolic process; IPR014311 Guanine deaminase
2624	3.19982	0.071703	0.320958	1	10.8333	18.3333	22.6	Root; GO:0008150 biological_process; GO:0006807 nitrogen compound metabolic process; IPR002624 Deoxynucleoside kinase
6236	3.18708	0.0723335	0.321591	1	32.5	30.5	25.6	Root; GO:0008150 biological_process; GO:0009058 biosynthetic process; IPR006236 D-3-phosphoglycerate dehydrogenase
2845	3.16865	0.0732558	0.324231	1	3.16667	3.66667	1.4	Root; GO:0008150 biological_process; GO:0016070 RNA metabolic process; IPR002845 tRNA ribose 2'-O-methyltransferase, aTrm56
5828	3.15653	0.07387	0.32549	1	16	14.1667	10.4	Root; GO:0008150 biological_process; GO:0006810 transport; IPR005828 Major facilitator, sugar transporter-like
17939	3.12802	0.0753378	0.330009	1	14.6667	11.1667	8.4	Root; GO:0008150 biological_process; GO:0009058 biosynthetic process; IPR017939 Gamma-glutamylcyclotransferase
10121	3.12151	0.0756778	0.330009	1	215	245.833	262.4	Root; GO:0008150 biological_process; GO:0044281 small molecule metabolic process; IPR010121 Pyruvate, phosphate dikinase
16481	3.112	0.0761774	0.330009	1	4.83333	3.16667	2.2	Root; GO:0008150 biological_process; Other; IPR016481 Transcription factor TFE, archaea
11386	3.11095	0.076233	0.330009	1	4	2.5	6.2	Root; GO:0008150 biological_process; GO:0009058 biosynthetic process; IPR002504 NAD kinase; IPR011386 Putative ATP-NAD kinase
5854	3.10011	0.0768076	0.331044	1	77.3333	68.8333	52.2	Root; GO:0008150 biological_process; GO:0009058 biosynthetic process; IPR005854 Amidophosphoribosyltransferase
15659	3.08872	0.0774167	0.331507	1	5.16667	6	15.8	Root; GO:0008150 biological_process; GO:0009056 catabolic process; IPR015659 Proline oxidase family
6032	3.07411	0.0782061	0.331507	1	29	35.6667	37.6	Root; GO:0008150 biological_process; GO:0006412 translation; IPR006032 Ribosomal protein S12/S23
1207	3.07134	0.0783568	0.331507	1	380.833	377.5	293	Root; GO:0008150 biological_process; GO:0006259 DNA metabolic process; IPR001207 Transposase, mutator type
2023	3.07105	0.0783724	0.331507	1	74.1667	76.1667	93.6	Root; GO:0008150 biological_process; GO:0055114 oxidation-reduction process; IPR002023 NADH-quinone oxidoreductase subunit E-like
3488	3.06698	0.0785944	0.331507	1	43.3333	43	50.8	Root; GO:0008150 biological_process; Other; IPR003488 DNA recombination-mediator protein A
11304	3.05917	0.0790223	0.331894	1	12.1667	10.1667	7	Root; GO:0008150 biological_process; GO:0055114 oxidation-reduction process; IPR001557 L-lactate/malate dehydrogenase; IPR011304 L-lactate dehydrogenase
17867	3.03621	0.0802968	0.334214	1	11	13	16.4	Root; GO:0008150 biological_process; GO:0019538 protein metabolic process; IPR017867 Protein-tyrosine phosphatase, low molecular weight
12754	3.0187	0.0812845	0.334214	1	274.167	297.667	322.4	Root; GO:0008150 biological_process; GO:0006351 transcription, DNA-templated; IPR012754 DNA-directed RNA polymerase, subunit beta-prime
11810	3.01857	0.0812918	0.334214	1	10.6667	8.16667	4.6	Root; GO:0008150 biological_process; GO:0009058 biosynthetic process; IPR011810 Cyanophycin synthetase
10977	3.01134	0.0817036	0.334214	1	3.66667	4.5	9.2	Root; GO:0008150 biological_process; GO:0044281 small molecule metabolic process; IPR002129 Pyridoxal phosphate-dependent decarboxylase; IPR010977 Aromatic-L-amino-acid decarboxylase
6375	3.00712	0.0819451	0.334214	1	19.1667	24.8333	11.6	Root; GO:0008150 biological_process; GO:0009058 biosynthetic process; IPR006375 Mannose-1-phosphate guanylyltransferase/mannose-6-phosphate isomerase
1626	2.98985	0.0829416	0.335915	1	35	40.6667	60.8	Root; GO:0008150 biological_process; GO:0006810 transport; IPR001626 ABC-3
4520	2.98811	0.0830428	0.335915	1	66.1667	64.5	73.4	Root; GO:0008150 biological_process; GO:0016070 RNA metabolic process; IPR004520 tRNA modification GTPase MnmE
1238	2.97445	0.0838426	0.336029	1	51.8333	51.5	61	Root; GO:0008150 biological_process; GO:0006259 DNA metabolic process; IPR001238 DNA-binding, RecF
672	2.97418	0.0838584	0.336029	1	60.3333	55.3333	69.4	Root; GO:0008150 biological_process; GO:0009058 biosynthetic process; IPR000672 Tetrahydrofolate dehydrogenase/cyclohydrolase
4384	2.97021	0.0840925	0.336029	1	12	16.5	8.6	Root; GO:0008150 biological_process; GO:0016070 RNA metabolic process; IPR004384 RNA methyltransferase TrmH, group 1
15861	2.9592	0.0847454	0.336933	1	57.8333	53.8333	43.8	Root; GO:0008150 biological_process; GO:0006810 transport; IPR015861 ABC transporter, ribose import, RbsA
2302	2.95491	0.0850012	0.336933	1	54	71.5	69.2	Root; GO:0008150 biological_process; GO:0006520 cellular amino acid metabolic process; IPR015413 Methionyl/Leucyl tRNA synthetase; IPR002302 Leucine-tRNA ligase
4808	2.94016	0.0858881	0.339086	1	40.8333	38.5	28.4	Root; GO:0008150 biological_process; GO:0006259 DNA metabolic process; IPR004808 AP endonuclease 1
5664	2.93126	0.0864282	0.339859	1	7.83333	14.6667	18.8	Root; GO:0008150 biological_process; GO:0009058 biosynthetic process; IPR005664 Tetrahydrodipicolinate N-succinyltransferase, transferase hexapeptide repeat family
6156	2.89737	0.0885212	0.346708	1	8.33333	10	14	Root; GO:0008150 biological_process; GO:0006520 cellular amino acid metabolic process; IPR006156 Dihydroneopterin aldolase
2028	2.88501	0.0892989	0.348372	1	11.6667	12.6667	7.6	Root; GO:0008150 biological_process; GO:0006520 cellular amino acid metabolic process; IPR002028 Tryptophan synthase, alpha chain
6060	2.8666	0.0904719	0.350891	1	7.33333	8.16667	16.8	Root; GO:0008150 biological_process; GO:0006810 transport; IPR006059 Solute-binding family 1; IPR006060 Maltose binding protein
19981	2.86015	0.0908873	0.350891	1	24.3333	27.3333	31	Root; GO:0008150 biological_process; GO:0006412 translation; IPR001971 Ribosomal protein S11; IPR019981 Ribosomal protein S11, bacterial-type
4763	2.85823	0.0910112	0.350891	1	24.6667	31.1667	61.6	Root; GO:0008150 biological_process; GO:0006810 transport; IPR001036 Acriflavin resistance protein; IPR004763 Cation efflux system CzcA/CusA/SilA/NccA/HelA/CnrA
30151	2.84482	0.0918822	0.35287	1	38.8333	45.8333	51.2	Root; GO:0008150 biological_process; GO:0006810 transport; GO:0006811 ion transport; IPR030151 K(+)/H(+) antiporter NhaP
6269	2.80927	0.0942387	0.359431	1	14.1667	21.6667	19.2	Root; GO:0008150 biological_process; Other; IPR006269 3-deoxy-8-phosphooctulonate synthase
6301	2.80808	0.0943186	0.359431	1	30.5	25	17.4	Root; GO:0008150 biological_process; GO:0006810 transport; GO:0009306 protein secretion; IPR001712 Type III secretion system FHIPEP; IPR006301 Flagellar biosynthesis protein FlhA
6401	2.76946	0.0969598	0.365524	1	3.83333	3.33333	2.2	Root; GO:0008150 biological_process; GO:0055114 oxidation-reduction process; IPR006401 2,5-diamino-6-hydroxy-4-(5-phosphoribosylamino)pyrimidine 1-reductase, archaeal
11784	2.76854	0.0970239	0.365524	1	4.33333	6.83333	15.4	Root; GO:0008150 biological_process; GO:0055114 oxidation-reduction process; IPR011784 Sulphate adenylyltransferase, small subunit
4547	2.76624	0.0971841	0.365524	1	60.6667	68.3333	82.4	Root; GO:0008150 biological_process; Other; IPR004547 Glucosamine-6-phosphate isomerase
4433	2.76316	0.0973991	0.365524	1	7	4.83333	2.6	Root; GO:0008150 biological_process; GO:0009058 biosynthetic process; IPR004433 Menaquinone biosynthesis protein MenD
10137	2.75632	0.0978776	0.365929	1	21.5	28.3333	31.2	Root; GO:0008150 biological_process; GO:0009058 biosynthetic process; IPR010137 Acyl-[acyl-carrier-protein]--UDP-N-acetylglucosamine O-acyltransferase
5863	2.74829	0.0984433	0.366268	1	67.8333	73.6667	85.4	Root; GO:0008150 biological_process; GO:0051301 cell division; IPR005863 UDP-N-acetylmuramoyl-tripeptide--D-alanyl-D-alanine ligase
5950	2.74452	0.0987105	0.366268	1	13.8333	11.5	8.4	Root; GO:0008150 biological_process; GO:0006810 transport; IPR006059 Solute-binding family 1; IPR005950 Molybdenum ABC transporter, periplasmic binding protein
19888	2.73219	0.0995895	0.368146	1	29.5	27.6667	20.8	Root; GO:0008150 biological_process; Other; IPR019888 Transcription regulator AsnC-type
12281	2.72515	0.100095	0.368632	1	40.5	46.3333	49	Root; GO:0008150 biological_process; GO:0009058 biosynthetic process; IPR003664 Fatty acid synthesis PlsX protein; IPR012281 Phospholipid biosynthesis protein, PlsX-like
4995	2.71219	0.101034	0.370478	1	45.1667	41	28	Root; GO:0008150 biological_process; Other; IPR004995 Bacillus/Clostridium Ger spore germination protein
8162	2.7079	0.101347	0.370478	1	19.8333	21.1667	31	Root; GO:0008150 biological_process; Other; IPR008162 Inorganic pyrophosphatase
4446	2.69081	0.102604	0.373691	1	12.8333	16.6667	13.8	Root; GO:0008150 biological_process; GO:0005975 carbohydrate metabolic process; IPR004446 D,D-heptose 1,7-bisphosphate phosphatase
11395	2.64575	0.106007	0.380613	1	25.8333	23.6667	13.2	Root; GO:0008150 biological_process; GO:0005975 carbohydrate metabolic process; IPR011395 Alpha glucuronidase
12166	2.64078	0.10639	0.380613	1	29.5	22.8333	18.8	Root; GO:0008150 biological_process; Other; IPR002933 Peptidase M20; IPR012166 Uncharacterised protein family RocB
114	2.63861	0.106558	0.380613	1	30.8333	33.3333	40.4	Root; GO:0008150 biological_process; GO:0006412 translation; IPR000114 Ribosomal protein L16
4373	2.63548	0.1068	0.380613	1	64.8333	71.8333	73.2	Root; GO:0008150 biological_process; GO:0016043 cellular component organization; IPR004373 Peptide chain release factor 1
8242	2.63266	0.10702	0.380613	1	22.1667	15.3333	13.6	Root; GO:0008150 biological_process; GO:0009058 biosynthetic process; IPR008242 Bifunctional P-protein, chorismate mutase/prephenate dehydratase
26259	2.62849	0.107344	0.380613	1	3	5.33333	10	Root; GO:0008150 biological_process; GO:0055114 oxidation-reduction process; IPR026259 Di-c-type haem protein, MauG/cytochrome c peroxidase
11923	2.6199	0.108017	0.380613	1	42.3333	50	43.2	Root; GO:0008150 biological_process; GO:0051301 cell division; IPR001182 Cell cycle protein FtsW/RodA; IPR011923 Rod shape-determining protein RodA
5930	2.61842	0.108133	0.380613	1	13.6667	7.33333	8	Root; GO:0008150 biological_process; GO:0009058 biosynthetic process; IPR005930 Pyruvate carboxylase
3775	2.60886	0.108889	0.381112	1	6.5	5.16667	3	Root; GO:0008150 biological_process; GO:0016043 cellular component organization; GO:0030031 cell projection assembly; IPR003775 Flagellar assembly factor FliW
23023	2.59878	0.109691	0.382563	1	21.6667	16	14.8	Root; GO:0008150 biological_process; GO:0009117 nucleotide metabolic process; GO:0046039 GTP metabolic process; IPR006261 Deoxyguanosinetriphosphate triphosphohydrolase; IPR023023 Deoxyguanosinetriphosphate triphosphohydrolase, type 2
6437	2.5927	0.110179	0.382912	1	21.1667	22.8333	13.6	Root; GO:0008150 biological_process; GO:0016043 cellular component organization; IPR006437 Bacteriophage terminase, large subunit
23748	2.56714	0.112256	0.387486	1	8.33333	5.66667	5	Root; GO:0008150 biological_process; GO:0009058 biosynthetic process; IPR023748 Replication factor C small subunit, archaeal
8703	2.56236	0.11265	0.387486	1	15.1667	20.5	25	Root; GO:0008150 biological_process; GO:0055114 oxidation-reduction process; IPR008703 Na(+)-translocating NADH-quinone reductase subunit A
11147	2.56208	0.112673	0.387486	1	22.8333	20	15	Root; GO:0008150 biological_process; GO:0009058 biosynthetic process; IPR011147 Bifunctional aspartokinase/homoserine dehydrogenase I
4485	2.55436	0.113312	0.38833	1	11.6667	10.3333	6.6	Root; GO:0008150 biological_process; GO:0009058 biosynthetic process; IPR004485 Cobalamin biosynthesis CobD/CbiB
4453	2.53696	0.114767	0.391155	1	15.3333	14	21	Root; GO:0008150 biological_process; GO:0009058 biosynthetic process; IPR004453 Epoxyqueuosine reductase QueG
3346	2.53504	0.114929	0.391155	1	232	207	190.6	Root; GO:0008150 biological_process; GO:0006259 DNA metabolic process; IPR003346 Transposase, IS116/IS110/IS902
456	2.52299	0.115951	0.393277	1	22.3333	29	27.6	Root; GO:0008150 biological_process; GO:0006412 translation; IPR000456 Ribosomal protein L17
11245	2.50542	0.117459	0.397027	1	47.3333	52.8333	69.8	Root; GO:0008150 biological_process; GO:0016310 phosphorylation; IPR000890 Aliphatic acid kinase, short-chain; IPR011245 Butyrate kinase
4665	2.50048	0.117887	0.397114	1	73.8333	77.5	88.8	Root; GO:0008150 biological_process; GO:0009058 biosynthetic process; IPR004665 Transcription termination factor Rho
4390	2.49237	0.118594	0.397343	1	49.8333	51.5	58.8	Root; GO:0008150 biological_process; GO:0016043 cellular component organization; IPR004390 Signal-recognition particle receptor FtsY
1139	2.49047	0.11876	0.397343	1	17.6667	12.8333	11	Root; GO:0008150 biological_process; GO:0006629 lipid metabolic process; IPR001139 Glycoside hydrolase, family 30
2024	2.47411	0.120203	0.399237	1	4.33333	6	9.4	Root; GO:0008150 biological_process; GO:0042592 homeostatic process; IPR002024 Bacterioferritin
6225	2.46816	0.120733	0.399237	1	80	74.5	86.8	Root; GO:0008150 biological_process; GO:0016070 RNA metabolic process; IPR006225 Pseudouridine synthase, RluC/RluD
28427	2.46667	0.120866	0.399237	1	32.1667	31.3333	39.8	Root; GO:0008150 biological_process; GO:0019538 protein metabolic process; IPR028427 Peptide methionine sulfoxide reductase
6377	2.4658	0.120944	0.399237	1	3.33333	5	6	Root; GO:0008150 biological_process; Other; IPR006377 Catabolite control protein A
4563	2.44719	0.122622	0.402021	1	17.6667	22.5	29.8	Root; GO:0008150 biological_process; GO:0009058 biosynthetic process; IPR004563 Apolipoprotein N-acyltransferase
6679	2.444	0.122912	0.402021	1	41.3333	48.8333	66.6	Root; GO:0008150 biological_process; GO:0009056 catabolic process; IPR006679 Adenine deaminase
4504	2.43727	0.123527	0.402021	1	73.5	74.1667	87.4	Root; GO:0008150 biological_process; GO:0006259 DNA metabolic process; IPR004504 DNA repair protein RadA
8141	2.42823	0.124358	0.402021	1	5.16667	5.5	8.6	Root; GO:0008150 biological_process; GO:0009056 catabolic process; IPR008141 Alanine dehydrogenase
4807	2.42805	0.124375	0.402021	1	154.167	159.5	167.6	Root; GO:0008150 biological_process; GO:0007154 cell communication; IPR004807 UvrABC system, subunit B
27493	2.41851	0.12526	0.402021	1	3	3.16667	5.8	Root; GO:0008150 biological_process; GO:0006412 translation; IPR002150 Ribosomal protein L31; IPR027493 Ribosomal protein L31 type B
11779	2.41795	0.125312	0.402021	1	9.5	16.8333	27	Root; GO:0008150 biological_process; GO:0006790 sulfur compound metabolic process; IPR011779 Sulphate adenylyltransferase, large subunit
3451	2.41626	0.125469	0.402021	1	58.8333	63.3333	68.4	Root; GO:0008150 biological_process; GO:0009058 biosynthetic process; IPR003451 4-hydroxy-3-methylbut-2-enyl diphosphate reductase
22955	2.41555	0.125536	0.402021	1	65.6667	71.3333	74.2	Root; GO:0008150 biological_process; GO:0009058 biosynthetic process; IPR022955 GMP synthase
1689	2.41207	0.125861	0.402021	1	15.1667	10.8333	10	Root; GO:0008150 biological_process; GO:0048870 cell motility; IPR001689 Flagellar motor switch protein FliM
5907	2.40542	0.126485	0.402712	1	33.8333	41.3333	42.4	Root; GO:0008150 biological_process; GO:0009058 biosynthetic process; IPR005907 Glucose-1-phosphate thymidylyltransferase, short form
5980	2.3982	0.127166	0.402965	1	7.66667	7	4.4	Root; GO:0008150 biological_process; GO:0009058 biosynthetic process; IPR005980 Nitrogenase cofactor biosynthesis protein NifB
16051	2.39123	0.127828	0.402965	1	10.6667	9.66667	7.4	Root; GO:0008150 biological_process; GO:0016070 RNA metabolic process; IPR003742 SPOUT methyltransferase, predicted; IPR016051 Ribosomal RNA large subunit methyltransferase H
398	2.38416	0.128504	0.402965	1	32.8333	43	35.6	Root; GO:0008150 biological_process; GO:0009058 biosynthetic process; IPR000398 Thymidylate synthase
10073	2.3831	0.128606	0.402965	1	43	56.8333	68.4	Root; GO:0008150 biological_process; GO:0009058 biosynthetic process; IPR010073 Phosphoribosylformylglycinamidine synthase
3256	2.37416	0.129467	0.403092	1	18	17.6667	21	Root; GO:0008150 biological_process; GO:0006412 translation; IPR003256 Ribosomal protein L24
23333	2.36278	0.130572	0.403092	1	18.5	19.5	14.2	Root; GO:0008150 biological_process; GO:0019538 protein metabolic process; IPR001353 Proteasome, subunit alpha/beta; IPR023333 Proteasome B-type subunit
11912	2.3627	0.130581	0.403092	1	2.16667	7.16667	11.6	Root; GO:0008150 biological_process; GO:0005975 carbohydrate metabolic process; IPR011912 ADP-L-glycero-D-manno-heptose-6-epimerase
748	2.36241	0.130609	0.403092	1	49.8333	49.5	56.8	Root; GO:0008150 biological_process; GO:0016070 RNA metabolic process; IPR000748 Pseudouridine synthase, RsuA/RluB/E/F
6276	2.36031	0.130814	0.403092	1	14.3333	10.3333	7.8	Root; GO:0008150 biological_process; GO:0009058 biosynthetic process; IPR006276 Cobalamin-independent methionine synthase
22842	2.35742	0.131097	0.403092	1	5.33333	5.83333	3	Root; GO:0008150 biological_process; GO:0006351 transcription, DNA-templated; IPR022842 DNA-directed RNA polymerase subunit D (Rpo3)
4608	2.34679	0.132145	0.403798	1	17.8333	20.1667	26.2	Root; GO:0008150 biological_process; GO:0006091 generation of precursor metabolites and energy; IPR004608 Methylmalonyl-CoA mutase, beta chain
26390	2.32888	0.13393	0.404502	1	11.3333	8.5	5	Root; GO:0008150 biological_process; GO:0006807 nitrogen compound metabolic process; IPR005888 dTDP-glucose 4,6-dehydratase; IPR026390 NAD dependent epimerase/dehydratase, LLPSF_EDH_00030 family
29500	2.31966	0.134861	0.404502	1	3.33333	4.33333	2.2	Root; GO:0008150 biological_process; GO:0009058 biosynthetic process; IPR029500 NADPH-dependent 7-cyano-7-deazaguanine reductase QueF
23036	2.31879	0.134949	0.404502	1	4.33333	5.5	7.4	Root; GO:0008150 biological_process; GO:0006412 translation; IPR001209 Ribosomal protein S14; IPR023036 Ribosomal protein S14, bacterial/plastid
10972	2.3184	0.134988	0.404502	1	5.83333	5.5	9.4	Root; GO:0008150 biological_process; GO:0005975 carbohydrate metabolic process; IPR010972 Beta-phosphoglucomutase
6411	2.31822	0.135006	0.404502	1	5.16667	8.66667	19.6	Root; GO:0008150 biological_process; GO:0005975 carbohydrate metabolic process; IPR000771 Ketose-bisphosphate aldolase, class-II; IPR006411 Fructose-bisphosphate aldolase, class II, yeast/E. coli subtype
13765	2.31757	0.135073	0.404502	1	68.8333	79.1667	80.8	Root; GO:0008150 biological_process; GO:0007154 cell communication; IPR013765 DNA recombination and repair protein RecA
394	2.31344	0.135493	0.404502	1	41.8333	49.6667	56.8	Root; GO:0008150 biological_process; GO:0009058 biosynthetic process; IPR000394 RNA polymerase sigma factor 54
23026	2.31186	0.135654	0.404502	1	86.5	78.3333	70.6	Root; GO:0008150 biological_process; GO:0009058 biosynthetic process; IPR023026 Tryptophan synthase beta chain/beta chain-like
13471	2.29892	0.136981	0.407228	1	22.5	23.6667	32.2	Root; GO:0008150 biological_process; GO:0016070 RNA metabolic process; IPR013471 Ribonuclease Z/BN
4593	2.28268	0.138666	0.410815	1	20.1667	17.3333	24	Root; GO:0008150 biological_process; GO:0006259 DNA metabolic process; IPR004593 Nuclease SbcCD subunit D
5748	2.27653	0.139311	0.410815	1	137.333	135.833	159	Root; GO:0008150 biological_process; GO:0006259 DNA metabolic process; IPR005748 DNA mismatch repair protein MutS, type 1
17582	2.27503	0.13947	0.410815	1	3.33333	4.5	7.2	Root; GO:0008150 biological_process; GO:0016070 RNA metabolic process; IPR017582 tRNA 2-selenouridine synthase
10945	2.26643	0.140378	0.410815	1	6.5	8.16667	4.4	Root; GO:0008150 biological_process; GO:0055114 oxidation-reduction process; IPR001557 L-lactate/malate dehydrogenase; IPR010945 Malate dehydrogenase, type 2
12327	2.26643	0.140378	0.410815	1	77.6667	81.6667	68.8	Root; GO:0008150 biological_process; GO:0006259 DNA metabolic process; IPR012327 D12 class N6 adenine-specific DNA methyltransferase
6419	2.26339	0.140701	0.410815	1	7.83333	7.33333	12.2	Root; GO:0008150 biological_process; GO:0006810 transport; IPR006419 Nicotinamide mononucleotide transporter PnuC
4685	2.25956	0.141109	0.410815	1	11	11.1667	6.6	Root; GO:0008150 biological_process; GO:0006810 transport; GO:0006811 ion transport; IPR004685 Branched-chain amino acid transport system II carrier protein
18077	2.24858	0.142286	0.410815	1	12.1667	10.3333	6.8	Root; GO:0008150 biological_process; GO:0009056 catabolic process; IPR002053 Glycoside hydrolase, family 25; IPR018077 Glycoside hydrolase, family 25 subgroup
8463	2.24858	0.142286	0.410815	1	8	7.66667	4.8	Root; GO:0008150 biological_process; GO:0006950 response to stress; IPR008463 Transcriptional repressor of class III stress genes
22694	2.24799	0.142349	0.410815	1	29	27.8333	40.6	Root; GO:0008150 biological_process; GO:0006629 lipid metabolic process; IPR022694 3-hydroxyacyl-CoA dehydrogenase
24711	2.23694	0.143545	0.412205	1	22.6667	20.3333	15.2	Root; GO:0008150 biological_process; GO:0055114 oxidation-reduction process; IPR018028 Catalase, mono-functional, haem-containing; IPR024711 Catalase, mono-functional, haem-containing, clades 1 and 3
1559	2.23283	0.143993	0.412205	1	4.83333	4.66667	2.4	Root; GO:0008150 biological_process; GO:0009056 catabolic process; IPR001559 Phosphotriesterase
22804	2.232	0.144084	0.412205	1	4	3.16667	2.4	Root; GO:0008150 biological_process; GO:0006412 translation; IPR002132 Ribosomal protein L5; IPR022804 Ribosomal protein L5, archaeal
8209	2.19193	0.148538	0.420826	1	43	40.3333	30.6	Root; GO:0008150 biological_process; GO:0009058 biosynthetic process; IPR008209 Phosphoenolpyruvate carboxykinase, GTP-utilising
3373	2.19012	0.148744	0.420826	1	204.167	206.333	186.8	Root; GO:0008150 biological_process; GO:0006810 transport; GO:0006811 ion transport; IPR003373 Ferrous iron transport protein B
20853	2.18551	0.149267	0.420826	1	31.6667	37.1667	40.4	Root; GO:0008150 biological_process; GO:0016043 cellular component organization; IPR004374 Peptide chain release factor 2; IPR020853 Peptide chain release factor 2, bacterial
24936	2.18544	0.149275	0.420826	1	44.3333	48	58.2	Root; GO:0008150 biological_process; Other; IPR024936 Cyclophilin-type peptidyl-prolyl cis-trans isomerase
4519	2.17647	0.150299	0.420826	1	4.66667	3.83333	2	Root; GO:0008150 biological_process; GO:0006351 transcription, DNA-templated; IPR004519 DNA-directed RNA polymerase, subunit E/RPC8
4553	2.17622	0.150328	0.420826	1	2.16667	4.16667	6.8	Root; GO:0008150 biological_process; GO:0051186 cofactor metabolic process; IPR002202 Hydroxymethylglutaryl-CoA reductase, class I/II; IPR004553 Hydroxymethylglutaryl-CoA reductase, bacterial-type
4800	2.17486	0.150484	0.420826	1	14.6667	20	22.8	Root; GO:0008150 biological_process; GO:0005975 carbohydrate metabolic process; IPR004800 Phosphosugar isomerase, KdsD/KpsF-type
2724	2.1699	0.151054	0.420826	1	5.83333	4.83333	3	Root; GO:0008150 biological_process; GO:0009056 catabolic process; IPR002724 Pyruvoyl-dependent arginine decarboxylase
12826	2.15543	0.152734	0.420826	1	12.1667	9	9.2	Root; GO:0008150 biological_process; GO:0048870 cell motility; IPR001172 Flagellar motor switch FliN/Type III secretion HrcQb; IPR012826 Flagellar motor switch FliN
18094	2.15265	0.153058	0.420826	1	33.6667	35.5	42.4	Root; GO:0008150 biological_process; GO:0009058 biosynthetic process; IPR018094 Thymidylate kinase
14223	2.15024	0.153341	0.420826	1	12.3333	13	18.2	Root; GO:0008150 biological_process; GO:0006810 transport; IPR014223 ABC transporter, CydDC cysteine exporter (CydDC-E) family, permease/ATP-binding protein CydC
12081	2.14766	0.153644	0.420826	1	8.5	5.5	3.8	Root; GO:0008150 biological_process; GO:0055114 oxidation-reduction process; IPR000103 Pyridine nucleotide-disulphide oxidoreductase, class-II; IPR012081 Alkyl hydroperoxide reductase subunit F
22865	2.14584	0.153859	0.420826	1	10.8333	13.3333	8.4	Root; GO:0008150 biological_process; GO:0009058 biosynthetic process; IPR000977 DNA ligase, ATP-dependent; IPR022865 DNA ligase, ATP-dependent, bacterial/archaeal
22917	2.14422	0.154049	0.420826	1	12.8333	9.16667	7.6	Root; GO:0008150 biological_process; GO:0006520 cellular amino acid metabolic process; IPR004529 Phenylalanyl-tRNA synthetase, class IIc, alpha subunit; IPR022917 Phenylalanine-tRNA ligase alpha subunit, bacterial/archaeal
20006	2.13608	0.155012	0.420826	1	12.3333	10.8333	5.8	Root; GO:0008150 biological_process; GO:0016043 cellular component organization; IPR020006 Signal-recognition particle (SRP)-type GTPase
19987	2.13499	0.155142	0.420826	1	30.3333	29.8333	26.2	Root; GO:0008150 biological_process; GO:0016043 cellular component organization; IPR019987 GTP-binding protein, ribosome biogenesis, YsxC
18090	2.13003	0.155733	0.420826	1	35.6667	41.8333	47.6	Root; GO:0008150 biological_process; GO:0006807 nitrogen compound metabolic process; IPR000053 Thymidine/pyrimidine-nucleoside phosphorylase; IPR018090 Pyrimidine-nucleoside phosphorylase, bacterial/eukaryotic
24920	2.12465	0.156377	0.420826	1	40	37.6667	31	Root; GO:0008150 biological_process; GO:0009058 biosynthetic process; IPR012135 Dihydroorotate dehydrogenase, class 1/ 2; IPR024920 Dihydroorotate dehydrogenase, class 1
5997	2.12463	0.156379	0.420826	1	3.83333	4.16667	2.4	Root; GO:0008150 biological_process; GO:0006412 translation; IPR005997 Ribosomal protein L30, archaeal
29751	2.12246	0.15664	0.420826	1	19.1667	19.5	23.2	Root; GO:0008150 biological_process; GO:0006412 translation; IPR029751 Ribosomal protein L25
630	2.12044	0.156883	0.420826	1	32.8333	33.3333	39.4	Root; GO:0008150 biological_process; GO:0006412 translation; IPR000630 Ribosomal protein S8
23639	2.12027	0.156904	0.420826	1	5.66667	5.66667	3.4	Root; GO:0008150 biological_process; GO:0009058 biosynthetic process; IPR002755 DNA primase, small subunit; IPR014052 DNA primase, small subunit, eukaryotic/archaeal; IPR023639 DNA primase small subunit PriS
3724	2.11278	0.157809	0.421628	1	20.5	19	27.4	Root; GO:0008150 biological_process; GO:0009058 biosynthetic process; IPR003724 ATP:cob(I)alamin adenosyltransferase CobA/CobO/ButR
10084	2.10818	0.158368	0.421628	1	38	40.5	48	Root; GO:0008150 biological_process; GO:0009058 biosynthetic process; IPR010084 Beta-hydroxyacyl-(acyl-carrier-protein) dehydratase FabZ
1448	2.10722	0.158484	0.421628	1	11	8.16667	5.6	Root; GO:0008150 biological_process; GO:0016043 cellular component organization; IPR001448 Small acid-soluble spore protein, alpha/beta-type
20918	2.10298	0.159002	0.421868	1	11.6667	11.6667	7.4	Root; GO:0008150 biological_process; GO:0016043 cellular component organization; IPR004403 Peptide chain release factor eRF1/aRF1; IPR020918 Peptide chain release factor aRF1
9164	2.09587	0.159874	0.423045	1	30.6667	35.3333	53.4	Root; GO:0008150 biological_process; GO:0009058 biosynthetic process; IPR009164 Fructose-1,6-bisphosphatase class 3
28883	2.07712	0.1622	0.427799	1	27.8333	33	30.8	Root; GO:0008150 biological_process; GO:0016070 RNA metabolic process; IPR028883 tRNA-specific adenosine deaminase
11924	2.07442	0.162538	0.427799	1	4.16667	7.66667	6.2	Root; GO:0008150 biological_process; GO:0006810 transport; IPR011924 Lipoprotein releasing system, ATP-binding protein
3700	2.0637	0.163889	0.429766	1	23.6667	23.6667	28.8	Root; GO:0008150 biological_process; GO:0009058 biosynthetic process; IPR003700 Ketopantoate hydroxymethyltransferase
3813	2.06159	0.164156	0.429766	1	25.6667	25.8333	14.2	Root; GO:0008150 biological_process; GO:0009058 biosynthetic process; IPR003813 Methyl-viologen-reducing hydrogenase, delta subunit
7170	2.05198	0.165379	0.431822	1	9.83333	7.16667	6.2	Root; GO:0008150 biological_process; GO:0043934 sporulation; IPR007170 Stage V sporulation protein G
22988	2.04111	0.166776	0.4329	1	7.83333	9	5.6	Root; GO:0008150 biological_process; Other; IPR022988 Nickel-responsive transcriptional regulator NikR
307	2.03979	0.166947	0.4329	1	16.6667	18.8333	23	Root; GO:0008150 biological_process; GO:0006412 translation; IPR000307 Ribosomal protein S16
4603	2.03855	0.167107	0.4329	1	6.83333	3.66667	5.8	Root; GO:0008150 biological_process; GO:0006259 DNA metabolic process; IPR004603 DNA mismatch endonuclease vsr
22911	2.03295	0.167833	0.433642	1	64.8333	66.6667	76.6	Root; GO:0008150 biological_process; GO:0006520 cellular amino acid metabolic process; IPR004529 Phenylalanyl-tRNA synthetase, class IIc, alpha subunit; IPR022911 Phenylalanine-tRNA ligase alpha chain 1, bacterial
5823	2.02696	0.168615	0.433929	1	33.1667	36.3333	38.2	Root; GO:0008150 biological_process; GO:0006412 translation; IPR005822 Ribosomal protein L13; IPR005823 Ribosomal protein L13, bacterial-type
17178	2.01977	0.169558	0.434343	1	8.66667	11.6667	15.2	Root; GO:0008150 biological_process; GO:0009058 biosynthetic process; IPR004588 4-hydroxy-3-methylbut-2-en-1-yl diphosphate synthase, bacterial-type; IPR017178 4-hydroxy-3-methylbut-2-en-1-yl diphosphate synthase, atypical
16446	2.01744	0.169865	0.434343	1	10.8333	8.33333	5.6	Root; GO:0008150 biological_process; GO:0055114 oxidation-reduction process; IPR016446 Flavin oxidoreductase Frp family
20921	2.01028	0.170812	0.434829	1	10.1667	7.5	7.4	Root; GO:0008150 biological_process; GO:0009058 biosynthetic process; IPR020921 Erythronate-4-phosphate dehydrogenase
6519	2.00326	0.171746	0.434829	1	33.3333	37.3333	32.6	Root; GO:0008150 biological_process; GO:0006412 translation; IPR000911 Ribosomal protein L11/L12; IPR006519 Ribosomal protein L11, bacterial-type
3170	2.00194	0.171923	0.434829	1	39.8333	47	40	Root; GO:0008150 biological_process; GO:0055114 oxidation-reduction process; IPR003170 UDP-N-acetylenolpyruvoylglucosamine reductase
6183	1.99923	0.172286	0.434829	1	43.8333	37	28.6	Root; GO:0008150 biological_process; GO:0055114 oxidation-reduction process; IPR006183 6-phosphogluconate dehydrogenase
18022	1.99769	0.172492	0.434829	1	60.8333	61.3333	71.8	Root; GO:0008150 biological_process; GO:0016070 RNA metabolic process; IPR018022 tRNA dimethylallyltransferase
18024	1.99564	0.172767	0.434829	1	7.66667	6	4.4	Root; GO:0008150 biological_process; GO:0006810 transport; GO:0006811 ion transport; IPR002751 Cobalamin (vitamin B12) biosynthesis CbiM family; IPR018024 Cobalamin (vitamin B12) biosynthesis protein CbiM
4662	1.97596	0.175437	0.437493	1	27.5	24.5	19.2	Root; GO:0008150 biological_process; GO:0009058 biosynthetic process; IPR001057 Glutamate/acetylglutamate kinase; IPR004662 Acetylglutamate kinase
2371	1.97504	0.175562	0.437493	1	25.1667	17.5	17.8	Root; GO:0008150 biological_process; GO:0016043 cellular component organization; GO:0030031 cell projection assembly; IPR002371 Flagellar hook-associated protein, FlgK
3180	1.97415	0.175685	0.437493	1	6.33333	8.5	12	Root; GO:0008150 biological_process; GO:0006259 DNA metabolic process; IPR003180 Methylpurine-DNA glycosylase (MPG)
28829	1.97205	0.175972	0.437493	1	5	4.5	2.8	Root; GO:0008150 biological_process; GO:0005975 carbohydrate metabolic process; IPR028829 Exo-beta-D-glucosaminidase
22937	1.94724	0.179416	0.44457	1	6.66667	5.5	3.4	Root; GO:0008150 biological_process; Other; IPR006206 Mevalonate/galactokinase; IPR006205 Mevalonate kinase; IPR022937 Mevalonate kinase, archaeal
29995	1.94445	0.179808	0.44457	1	6.83333	5.66667	3.8	Root; GO:0008150 biological_process; Other; IPR029995 Transcriptional regulatory protein FlbD
4804	1.94189	0.18017	0.44457	1	8.16667	9.83333	4.8	Root; GO:0008150 biological_process; GO:0009058 biosynthetic process; IPR002616 tRNA-guanine(15) transglycosylase-like; IPR004804 tRNA-guanine(15) transglycosylase
20868	1.93509	0.181131	0.445826	1	9.83333	7.83333	4	Root; GO:0008150 biological_process; GO:0009058 biosynthetic process; IPR020868 Bifunctional enzyme Fae/Hps
23066	1.92315	0.182835	0.447269	1	22.8333	27.8333	21.2	Root; GO:0008150 biological_process; GO:0009058 biosynthetic process; IPR003473 Quinolinate synthetase A; IPR023066 Quinolinate synthase A, type 2
12188	1.92183	0.183024	0.447269	1	16.3333	22	35.6	Root; GO:0008150 biological_process; GO:0055114 oxidation-reduction process; IPR012188 Malic enzyme, phosphate acetyl/butaryl transferase
22918	1.92146	0.183077	0.447269	1	10.1667	13	8.4	Root; GO:0008150 biological_process; GO:0006520 cellular amino acid metabolic process; IPR004531 Phenylalanyl-tRNA synthetase, class IIc, beta subunit, archae/euk cytosolic; IPR022918 Phenylalanine-tRNA ligase beta chain 2, bacterial/archaeal
12763	1.89869	0.186382	0.454221	1	71	78.5	81.6	Root; GO:0008150 biological_process; GO:0009058 biosynthetic process; IPR012763 DNA polymerase III, subunit gamma/ tau
238	1.87645	0.189676	0.459226	1	16.8333	20.3333	16.8	Root; GO:0008150 biological_process; GO:0016070 RNA metabolic process; IPR000238 Ribosome-binding factor A
11282	1.87203	0.190338	0.459226	1	39	47.3333	56.6	Root; GO:0008150 biological_process; GO:0009056 catabolic process; IPR011282 2-amino-3-ketobutyrate coenzyme A ligase
4368	1.86899	0.190794	0.459226	1	17.1667	21.3333	19.4	Root; GO:0008150 biological_process; Other; IPR004368 Translation initiation factor IF-1
10332	1.86374	0.191588	0.459226	1	7.16667	5.83333	2.4	Root; GO:0008150 biological_process; GO:0016043 cellular component organization; IPR010332 ATPase terminase subunit, putative
10185	1.85997	0.192158	0.459226	1	7.33333	6.33333	3.4	Root; GO:0008150 biological_process; GO:0051186 cofactor metabolic process; IPR010185 NADPH-dependent F420 reductase
1694	1.85364	0.193122	0.460217	1	20.6667	26.1667	24.6	Root; GO:0008150 biological_process; GO:0055114 oxidation-reduction process; IPR001694 NADH:ubiquinone oxidoreductase, subunit 1/F420H2 oxidoreductase subunit H
6443	1.85113	0.193506	0.460217	1	5.16667	4.66667	2.4	Root; GO:0008150 biological_process; GO:0045333 cellular respiration; IPR006443 Formate dehydrogenase-N, alpha subunit
6138	1.84601	0.194291	0.460975	1	8.5	6.66667	5.4	Root; GO:0008150 biological_process; GO:0055114 oxidation-reduction process; IPR006138 NADH-ubiquinone oxidoreductase, 20 Kd subunit
23052	1.83741	0.195619	0.461978	1	6	5.16667	3.4	Root; GO:0008150 biological_process; GO:0016043 cellular component organization; IPR007561 Cell division protein SepF/SepF-related; IPR023052 Cell division protein SepF
8358	1.83533	0.195942	0.461978	1	4.66667	4.33333	2.6	Root; GO:0008150 biological_process; GO:0007165 signal transduction; GO:0000160 phosphorelay signal transduction system; IPR008358 Signal transduction histidine kinase/phosphatase, lantibiotic regulatory protein MprB
4610	1.82943	0.19686	0.461978	1	82.5	76.8333	88.8	Root; GO:0008150 biological_process; GO:0006259 DNA metabolic process; IPR004610 Bacterial RecJ exonuclease
15712	1.82764	0.197139	0.461978	1	288.5	303.833	316.4	Root; GO:0008150 biological_process; GO:0006351 transcription, DNA-templated; IPR015712 DNA-directed RNA polymerase, subunit 2
5946	1.82359	0.197773	0.461978	1	79.6667	88.5	85.4	Root; GO:0008150 biological_process; GO:0009058 biosynthetic process; IPR005946 Ribose-phosphate diphosphokinase
4612	1.82353	0.197783	0.461978	1	3.5	4.5	5.6	Root; GO:0008150 biological_process; GO:0006259 DNA metabolic process; IPR004612 Holliday junction resolvase RecU
14239	1.82217	0.197998	0.461978	1	7.5	4.33333	3.2	Root; GO:0008150 biological_process; Other; IPR014239 Spore germination YpeB
7221	1.81519	0.199096	0.461978	1	22.6667	23	27.6	Root; GO:0008150 biological_process; Other; IPR007221 Rod shape-determining protein MreC
23940	1.81363	0.199344	0.461978	1	35.3333	39	30	Root; GO:0008150 biological_process; GO:0009058 biosynthetic process; IPR023940 Dihydrodipicolinate reductase
4776	1.81331	0.199395	0.461978	1	24.8333	24.6667	17.2	Root; GO:0008150 biological_process; GO:0006810 transport; IPR004776 Auxin efflux carrier
11605	1.77624	0.205366	0.474698	1	23.6667	20.3333	27.2	Root; GO:0008150 biological_process; GO:0009058 biosynthetic process; IPR011605 NusB antitermination factor
5743	1.75729	0.208496	0.479817	1	203.833	209.833	230.2	Root; GO:0008150 biological_process; GO:0016043 cellular component organization; IPR005743 DNA gyrase, subunit A
8670	1.75695	0.208553	0.479817	1	3.83333	6.5	7.2	Root; GO:0008150 biological_process; GO:0055114 oxidation-reduction process; IPR008670 Acyl-CoA reductase, LuxC
2812	1.75369	0.209097	0.479951	1	6.66667	7.16667	4.2	Root; GO:0008150 biological_process; GO:0009058 biosynthetic process; IPR002812 3-dehydroquinate synthase
2065	1.74781	0.210083	0.48067	1	7.33333	8	13.2	Root; GO:0008150 biological_process; GO:0055114 oxidation-reduction process; IPR002065 Putative thiol peroxidase Tpx
12259	1.74602	0.210384	0.48067	1	17.3333	19	22	Root; GO:0008150 biological_process; GO:0009058 biosynthetic process; IPR012259 Dihydrofolate reductase
1193	1.73697	0.211914	0.483046	1	10.1667	11.6667	6.4	Root; GO:0008150 biological_process; GO:0019538 protein metabolic process; IPR001193 Membrane-bound transcription factor site-2 protease
4486	1.73154	0.212838	0.483046	1	10.3333	7.83333	5.2	Root; GO:0008150 biological_process; GO:0044281 small molecule metabolic process; IPR004486 CO dehydrogenase/acetyl-CoA synthase delta subunit
10047	1.70875	0.216767	0.49056	1	15.1667	13.5	9.2	Root; GO:0008150 biological_process; GO:0055114 oxidation-reduction process; IPR004137 Hydroxylamine reductase/Ni-containing CO dehydrogenase; IPR010047 Ni-containing CO dehydrogenase
6293	1.70497	0.217428	0.49056	1	46.1667	53	63.6	Root; GO:0008150 biological_process; GO:0006259 DNA metabolic process; IPR004589 DNA helicase, ATP-dependent, RecQ type; IPR006293 DNA helicase, ATP-dependent, RecQ type, bacterial
60	1.70344	0.217695	0.49056	1	7.5	7.16667	5	Root; GO:0008150 biological_process; GO:0006810 transport; IPR000060 BCCT transporter family
10401	1.69124	0.219844	0.494274	1	39.5	50.5	45.8	Root; GO:0008150 biological_process; GO:0005975 carbohydrate metabolic process; IPR010401 Glycogen debranching enzyme
1624	1.68738	0.220528	0.494685	1	2.83333	3.16667	1.8	Root; GO:0008150 biological_process; GO:0048870 cell motility; IPR001624 Flagellar hook-basal body complex protein FliE
5776	1.67332	0.223043	0.499192	1	26.5	23.6667	20.8	Root; GO:0008150 biological_process; GO:0006810 transport; GO:0006811 ion transport; IPR005776 Oxaloacetate decarboxylase, alpha subunit
4620	1.6642	0.224692	0.501744	1	19.5	15.6667	11	Root; GO:0008150 biological_process; GO:0006520 cellular amino acid metabolic process; IPR003171 Methylenetetrahydrofolate reductase; IPR004620 5,10-methylenetetrahydrofolate reductase
30842	1.65926	0.225591	0.502615	1	68.1667	68.6667	79.4	Root; GO:0008150 biological_process; GO:0009058 biosynthetic process; IPR030842 Transcription termination/antitermination protein NusA, bacterial
6219	1.65469	0.226425	0.503338	1	9.5	7.33333	5.6	Root; GO:0008150 biological_process; GO:0009058 biosynthetic process; IPR006219 DHAP synthase, class 1
30679	1.64968	0.227345	0.503907	1	48	43.8333	37.8	Root; GO:0008150 biological_process; GO:0006810 transport; GO:0006811 ion transport; IPR030679 ABC-type amino acid transport system, ATPase component, HisP-type
2481	1.64685	0.227866	0.503907	1	32.5	28.1667	33.6	Root; GO:0008150 biological_process; Other; IPR002481 Ferric-uptake regulator
26593	1.64497	0.228213	0.503907	1	98.6667	99.6667	108	Root; GO:0008150 biological_process; GO:0006810 transport; IPR002208 SecY/SEC61-alpha family; IPR026593 Protein translocase subunit SecY
2317	1.61932	0.23301	0.511101	1	93.6667	103.667	100.6	Root; GO:0008150 biological_process; GO:0006520 cellular amino acid metabolic process; IPR002317 Serine-tRNA ligase, type1
15862	1.61782	0.233294	0.511101	1	37.6667	34.1667	31	Root; GO:0008150 biological_process; GO:0006810 transport; IPR015862 ABC transporter, galactose import, MglA
13485	1.61745	0.233364	0.511101	1	6.16667	6.66667	4.4	Root; GO:0008150 biological_process; GO:0009058 biosynthetic process; IPR013485 Molybdenum cofactor biosynthesis protein A, archaea
5740	1.61651	0.233543	0.511101	1	11	14.3333	17	Root; GO:0008150 biological_process; GO:0016043 cellular component organization; IPR001241 DNA topoisomerase, type IIA; IPR000565 DNA topoisomerase, type IIA, subunit B; IPR005740 DNA topoisomerase 4 subunit B, Gram-positive
5263	1.60988	0.234804	0.512354	1	49.5	53.8333	45.8	Root; GO:0008150 biological_process; Other; IPR002220 DapA-like; IPR005263 4-hydroxy-tetrahydrodipicolinate synthase, DapA
16299	1.60805	0.235153	0.512354	1	33.6667	31.5	25	Root; GO:0008150 biological_process; GO:0009058 biosynthetic process; IPR000926 GTP cyclohydrolase II, RibA; IPR016299 Riboflavin biosynthesis protein RibBA
3719	1.59504	0.237657	0.516667	1	7.16667	4	6.6	Root; GO:0008150 biological_process; GO:0009058 biosynthetic process; IPR003719 Phenazine biosynthesis PhzF protein
4764	1.58131	0.240333	0.521337	1	12.8333	9.33333	6.4	Root; GO:0008150 biological_process; GO:0006810 transport; IPR001036 Acriflavin resistance protein; IPR004764 Hydrophobe/amphiphile efflux-1 HAE1
11557	1.56962	0.242636	0.522119	1	177.833	175.667	190	Root; GO:0008150 biological_process; GO:0016043 cellular component organization; IPR001241 DNA topoisomerase, type IIA; IPR000565 DNA topoisomerase, type IIA, subunit B; IPR011557 DNA gyrase, subunit B
1272	1.56223	0.244105	0.522119	1	59.5	68.3333	73.8	Root; GO:0008150 biological_process; GO:0009058 biosynthetic process; IPR001272 Phosphoenolpyruvate carboxykinase, ATP-utilising
4576	1.55216	0.246125	0.522119	1	167.833	179.167	182.8	Root; GO:0008150 biological_process; GO:0006259 DNA metabolic process; IPR004576 Transcription-repair coupling factor
19939	1.55083	0.246393	0.522119	1	7.66667	6.16667	4.4	Root; GO:0008150 biological_process; GO:0009058 biosynthetic process; IPR019939 CofG family
3735	1.54861	0.246842	0.522119	1	6.5	7.66667	4.8	Root; GO:0008150 biological_process; Other; IPR003735 Metal-sensitive transcriptional repressor
19984	1.54707	0.247152	0.522119	1	16.8333	19.1667	21.6	Root; GO:0008150 biological_process; GO:0006412 translation; IPR000266 Ribosomal protein S17/S11; IPR019984 Ribosomal protein S17, bacterial-type
1672	1.5469	0.247188	0.522119	1	80.6667	90	83.8	Root; GO:0008150 biological_process; GO:0009058 biosynthetic process; IPR001672 Phosphoglucose isomerase (PGI)
2774	1.54454	0.247665	0.522119	1	7.33333	4.66667	4	Root; GO:0008150 biological_process; Other; IPR002774 Flagellin, archaea
5852	1.5429	0.247999	0.522119	1	2.16667	4	13.4	Root; GO:0008150 biological_process; GO:0005975 carbohydrate metabolic process; IPR005852 Phosphoglucomutase, alpha-D-glucose specific
4791	1.54265	0.24805	0.522119	1	101.333	110.667	112.2	Root; GO:0008150 biological_process; GO:0006259 DNA metabolic process; IPR004791 UvrABC system, subunit C
30660	1.53642	0.249319	0.522119	1	47.8333	42.3333	38.6	Root; GO:0008150 biological_process; GO:0006810 transport; GO:0006811 ion transport; IPR030660 High-affinity branched-chain amino acid transport ATP-binding protein
4539	1.53627	0.249351	0.522119	1	11	10	7.2	Root; GO:0008150 biological_process; GO:0009058 biosynthetic process; IPR004539 Translation elongation factor EF1A, eukaryotic/archaeal
27492	1.53236	0.250151	0.522119	1	43.8333	48.8333	51.2	Root; GO:0008150 biological_process; GO:0016070 RNA metabolic process; IPR004383 Ribosomal RNA large subunit methyltransferase RlmN/Cfr; IPR027492 Dual-specificity RNA methyltransferase RlmN
11907	1.53038	0.250558	0.522119	1	37.6667	36.3333	42.8	Root; GO:0008150 biological_process; GO:0009056 catabolic process; IPR011907 Ribonuclease III
22963	1.52652	0.251353	0.522119	1	19.1667	21.1667	26.6	Root; GO:0008150 biological_process; Other; IPR006206 Mevalonate/galactokinase; IPR000705 Galactokinase; IPR022963 Galactokinase, bacterial
11798	1.52578	0.251506	0.522119	1	3.16667	5.16667	8.2	Root; GO:0008150 biological_process; GO:0055114 oxidation-reduction process; IPR004511 Phosphoadenosine phosphosulphate/adenosine 5'-phosphosulphate reductase; IPR011798 Adenosine 5'-phosphosulphate reductase
4363	1.52565	0.251533	0.522119	1	13	9.83333	11.4	Root; GO:0008150 biological_process; GO:0009058 biosynthetic process; IPR004363 Methylglyoxal synthase
22337	1.52426	0.25182	0.522119	1	11.5	14.3333	18.8	Root; GO:0008150 biological_process; GO:0006629 lipid metabolic process; IPR000760 Inositol monophosphatase; IPR022337 Inositol monophosphatase, SuhB
20814	1.52327	0.252023	0.522119	1	14.3333	19.5	19.4	Root; GO:0008150 biological_process; GO:0006412 translation; IPR000529 Ribosomal protein S6; IPR020814 Ribosomal protein S6, plastid/chloroplast
23010	1.52321	0.252038	0.522119	1	42.1667	50.1667	49.8	Root; GO:0008150 biological_process; GO:0009056 catabolic process; IPR020581 Glycine cleavage system P protein; IPR023010 Probable glycine dehydrogenase (decarboxylating) subunit 1
22496	1.52179	0.252331	0.522119	1	25.1667	25.6667	31.8	Root; GO:0008150 biological_process; GO:0016070 RNA metabolic process; IPR022496 tRNA threonylcarbamoyl adenosine modification protein YeaZ
20653	1.51523	0.253696	0.523845	1	8.5	8.83333	5.4	Root; GO:0008150 biological_process; GO:0006520 cellular amino acid metabolic process; IPR002305 Aminoacyl-tRNA synthetase, class Ic; IPR002306 Tryptophan-tRNA ligase; IPR020653 Tryptophan-tRNA ligase, archaea
4544	1.48977	0.259068	0.532389	1	13	10.1667	8.8	Root; GO:0008150 biological_process; Other; IPR004544 Translation initiation factor aIF-2, archaea
5227	1.48837	0.259368	0.532389	1	16.6667	22.1667	19.6	Root; GO:0008150 biological_process; GO:0016070 RNA metabolic process; IPR005227 Putative pre-16S rRNA nuclease
14628	1.48798	0.259452	0.532389	1	22.6667	22	26.6	Root; GO:0008150 biological_process; GO:0005975 carbohydrate metabolic process; IPR001250 Mannose-6-phosphate isomerase, type I; IPR014628 Mannose-6-phosphate isomerase, Firmicutes type, short form
1656	1.4834	0.260433	0.533292	1	10.8333	8.66667	6.4	Root; GO:0008150 biological_process; GO:0016070 RNA metabolic process; IPR001656 Pseudouridine synthase, TruD
5671	1.46608	0.264186	0.539789	1	42.5	38.6667	30.6	Root; GO:0008150 biological_process; GO:0009058 biosynthetic process; IPR005671 2-isopropylmalate synthase, bacterial-type
10285	1.46282	0.2649	0.539789	1	18	16.5	24.6	Root; GO:0008150 biological_process; GO:0016043 cellular component organization; IPR010285 DNA helicase Pif1-like
5712	1.46124	0.265246	0.539789	1	28.6667	31.6667	36	Root; GO:0008150 biological_process; GO:0006412 translation; IPR000851 Ribosomal protein S5; IPR005712 Ribosomal protein S5, bacterial-type
4532	1.45175	0.267338	0.540382	1	118	128.5	126	Root; GO:0008150 biological_process; GO:0006520 cellular amino acid metabolic process; IPR004532 Phenylalanine-tRNA ligase, class IIc, beta subunit
26253	1.45124	0.26745	0.540382	1	27.6667	23.5	23	Root; GO:0008150 biological_process; GO:0006810 transport; GO:0006811 ion transport; IPR026253 Methionine import ATP-binding protein MetN
14053	1.44999	0.267727	0.540382	1	5.66667	6.83333	3.6	Root; GO:0008150 biological_process; GO:0044281 small molecule metabolic process; IPR014053 Formylmethanofuran: tetrahydromethanopterin formyltransferase Ftr
24108	1.43659	0.270718	0.544766	1	17.8333	25.5	19.8	Root; GO:0008150 biological_process; GO:0006520 cellular amino acid metabolic process; IPR002305 Aminoacyl-tRNA synthetase, class Ic; IPR002307 Tyrosine-tRNA ligase; IPR024088 Tyrosine-tRNA ligase, bacterial-type; IPR024108 Tyrosine-tRNA ligase, bacterial-type, type 2
6345	1.43532	0.271003	0.544766	1	58.5	57.5	46.8	Root; GO:0008150 biological_process; GO:0016043 cellular component organization; IPR006345 DNA helicase, RecD-like
5786	1.43071	0.272043	0.545744	1	44.1667	40.8333	48.8	Root; GO:0008150 biological_process; Other; IPR001544 Aminotransferase class IV; IPR005786 Branched-chain amino acid aminotransferase II
4513	1.42402	0.273558	0.547671	1	17.6667	15.5	13.8	Root; GO:0008150 biological_process; Other; IPR004513 Cell division protein FtsX
6669	1.40795	0.277241	0.552519	1	82.3333	84	97	Root; GO:0008150 biological_process; GO:0006810 transport; GO:0006811 ion transport; IPR006669 Magnesium transporter MgtE
22487	1.40714	0.277427	0.552519	1	2.83333	4.5	3.6	Root; GO:0008150 biological_process; GO:0009058 biosynthetic process; IPR011182 L-aspartate dehydrogenase; IPR020626 L-aspartate dehydrogenase, prokaryotic; IPR022487 L-aspartate dehydrogenase, archaeal
22910	1.40614	0.277659	0.552519	1	22.8333	26.8333	30.8	Root; GO:0008150 biological_process; GO:0055114 oxidation-reduction process; IPR022910 Thiol:disulphide interchange protein DsbD
13441	1.40229	0.27855	0.553177	1	6.33333	9.16667	11.6	Root; GO:0008150 biological_process; GO:0006520 cellular amino acid metabolic process; IPR011166 Beta-eliminating lyase family; IPR013441 Tyrosine phenol-lyase
22909	1.39936	0.279229	0.553412	1	6.33333	5.66667	4.4	Root; GO:0008150 biological_process; Other; IPR001790 Ribosomal protein L10P; IPR022909 50S ribosomal protein L10, archaea
24913	1.39664	0.279864	0.553559	1	8.33333	6.16667	6.4	Root; GO:0008150 biological_process; GO:0016070 RNA metabolic process; IPR024913 tRNA(Ile2) 2-agmatinylcytidine synthetase TiaS
8844	1.39316	0.280676	0.554055	1	14.5	10.6667	10.4	Root; GO:0008150 biological_process; Other; IPR008844 Spore germination GerAC
8338	1.38263	0.283154	0.55783	1	3.83333	5.66667	5	Root; GO:0008150 biological_process; GO:0009058 biosynthetic process; IPR008338 Capsule biosynthesis protein CapC
1091	1.37307	0.285425	0.561184	1	152.833	141.333	123.8	Root; GO:0008150 biological_process; GO:0006259 DNA metabolic process; IPR001091 Restriction/modification DNA-methylase
422	1.36959	0.286258	0.561703	1	5.66667	5.16667	3.6	Root; GO:0008150 biological_process; GO:0009058 biosynthetic process; IPR000422 3,4-dihydroxy-2-butanone 4-phosphate synthase, RibB
17665	1.36432	0.287521	0.562903	1	30.8333	31.8333	35.4	Root; GO:0008150 biological_process; GO:0009117 nucleotide metabolic process; IPR017665 Guanylate kinase
11404	1.3623	0.28801	0.562903	1	13.3333	16.6667	10	Root; GO:0008150 biological_process; GO:0005975 carbohydrate metabolic process; IPR022953 ATP-dependent 6-phosphofructokinase; IPR011404 Pyrophosphate--fructose 6-phosphate 1-phosphotransferase, XF0274
20886	1.35752	0.289165	0.564043	1	6.83333	6.5	4.8	Root; GO:0008150 biological_process; Other; IPR020886 Transcription regulator HTH, Cro/C1-type DNA-binding
2769	1.35328	0.290193	0.564851	1	5	5.33333	3.6	Root; GO:0008150 biological_process; GO:0016043 cellular component organization; IPR002769 Translation initiation factor IF6
23501	1.3511	0.290724	0.564851	1	8.33333	8.5	5.8	Root; GO:0008150 biological_process; GO:0009056 catabolic process; IPR005937 26S proteasome subunit P45; IPR023501 Proteasome-activating nucleotidase PAN
20818	1.34829	0.291408	0.565069	1	19.6667	21.8333	26	Root; GO:0008150 biological_process; Other; IPR020818 Chaperonin Cpn10
10966	1.33785	0.293974	0.568835	1	17	17.8333	22	Root; GO:0008150 biological_process; GO:0006810 transport; IPR004338 NADH-quinone reductase NQR2/RnfD; IPR010966 Na(+)-translocating NADH-quinone reductase subunit B
43	1.33397	0.294933	0.568835	1	69.5	77.5	78.4	Root; GO:0008150 biological_process; GO:0044281 small molecule metabolic process; IPR000043 Adenosylhomocysteinase
14780	1.33138	0.295575	0.568835	1	36	38.6667	42.4	Root; GO:0008150 biological_process; GO:0016070 RNA metabolic process; IPR002501 Pseudouridine synthase II; IPR014780 tRNA pseudouridine synthase II, TruB
1015	1.33105	0.295656	0.568835	1	2.16667	2.5	3.6	Root; GO:0008150 biological_process; GO:0009058 biosynthetic process; IPR001015 Ferrochelatase
23586	1.32141	0.298062	0.572349	1	171.667	182.333	191.8	Root; GO:0008150 biological_process; GO:0006520 cellular amino acid metabolic process; IPR002301 Isoleucine-tRNA ligase; IPR023586 Isoleucine-tRNA ligase, type 2
6262	1.31776	0.298979	0.572995	1	19	21.8333	24.6	Root; GO:0008150 biological_process; GO:0009056 catabolic process; IPR006262 Cytidine deaminase, homotetrameric
4489	1.31503	0.299667	0.573201	1	11	15	15.8	Root; GO:0008150 biological_process; GO:0055114 oxidation-reduction process; IPR004489 Succinate dehydrogenase/fumarate reductase iron-sulphur protein
2842	1.30152	0.303097	0.57833	1	14.3333	11.6667	11	Root; GO:0008150 biological_process; GO:0006810 transport; GO:0006811 ion transport; IPR002842 ATPase, V1/A1 complex, subunit E
3995	1.29963	0.303581	0.57833	1	6.33333	7.33333	9.8	Root; GO:0008150 biological_process; GO:0009405 pathogenesis; IPR003995 RTX toxin determinant A
4445	1.28083	0.308439	0.584229	1	10.8333	13.6667	14.2	Root; GO:0008150 biological_process; GO:0006810 transport; GO:0006811 ion transport; IPR004445 Sodium/glutamate symporter
10205	1.2775	0.30931	0.584229	1	14.3333	17.8333	23.8	Root; GO:0008150 biological_process; GO:0055114 oxidation-reduction process; IPR010205 Na(+)-translocating NADH-quinone reductase subunit F
4569	1.27499	0.309966	0.584229	1	10	11	14.4	Root; GO:0008150 biological_process; GO:0009058 biosynthetic process; IPR004569 Pyridoxal phosphate (active vitamin B6) biosynthesis PdxJ
3758	1.27422	0.310168	0.584229	1	17	22.5	22.4	Root; GO:0008150 biological_process; GO:0009058 biosynthetic process; IPR003758 Tetraacyldisaccharide 4'-kinase
12758	1.2681	0.311779	0.586144	1	21.5	19.1667	15	Root; GO:0008150 biological_process; GO:0006351 transcription, DNA-templated; IPR012758 DNA-directed RNA polymerase subunit A' (Rpo1N)
730	1.26039	0.31382	0.58886	1	6.16667	5.66667	3.6	Root; GO:0008150 biological_process; Other; IPR000730 Proliferating cell nuclear antigen, PCNA
11877	1.2548	0.315312	0.590538	1	18.8333	17.3333	20.8	Root; GO:0008150 biological_process; GO:0005975 carbohydrate metabolic process; IPR002139 Ribokinase; IPR011877 Ribokinase, bacterial
5763	1.24268	0.318572	0.5954	1	20	14.8333	14.4	Root; GO:0008150 biological_process; GO:0005975 carbohydrate metabolic process; IPR005763 L-fucose isomerase
16425	1.2393	0.319488	0.5954	1	38.6667	44.5	37.2	Root; GO:0008150 biological_process; GO:0009058 biosynthetic process; IPR004588 4-hydroxy-3-methylbut-2-en-1-yl diphosphate synthase, bacterial-type; IPR016425 4-hydroxy-3-methylbut-2-en-1-yl diphosphate synthase, bacterial
3764	1.23795	0.319855	0.5954	1	41.8333	49.1667	39.4	Root; GO:0008150 biological_process; Other; IPR003764 N-acetylglucosamine-6-phosphate deacetylase
1669	1.23529	0.320577	0.5954	1	12	12	8.2	Root; GO:0008150 biological_process; Other; IPR001669 Arginine repressor
14237	1.2304	0.321915	0.5954	1	3.5	2.66667	1.6	Root; GO:0008150 biological_process; Other; IPR003658 Anti-sigma factor antagonist; IPR014237 Anti-sigma F factor antagonist
24904	1.21901	0.32505	0.5954	1	39.1667	46.3333	43.4	Root; GO:0008150 biological_process; GO:0006520 cellular amino acid metabolic process; IPR006130 Aspartate/ornithine carbamoyltransferase; IPR002292 Ornithine/putrescine carbamoyltransferase; IPR024904 Ornithine carbamoyltransferase
20629	1.21867	0.325143	0.5954	1	14.6667	19	21.2	Root; GO:0008150 biological_process; GO:0006259 DNA metabolic process; IPR020629 Formamidopyrimidine-DNA glycosylase
4381	1.21694	0.325623	0.5954	1	18.3333	17.5	13.2	Root; GO:0008150 biological_process; GO:0016310 phosphorylation; IPR004381 Glycerate kinase
6255	1.21422	0.326378	0.5954	1	7.66667	4.33333	4.8	Root; GO:0008150 biological_process; GO:0044281 small molecule metabolic process; IPR006255 Dihydrolipoamide succinyltransferase
11773	1.21004	0.327543	0.5954	1	71.3333	75.1667	77.6	Root; GO:0008150 biological_process; GO:0006351 transcription, DNA-templated; IPR011773 DNA-directed RNA polymerase, alpha subunit
17597	1.20953	0.327687	0.5954	1	7.33333	5	5.4	Root; GO:0008150 biological_process; GO:0009058 biosynthetic process; IPR017597 Pyruvate dehydrogenase (acetyl-transferring) E1 component, alpha subunit, subgroup y
4551	1.20262	0.329623	0.5954	1	6.33333	4.5	3.2	Root; GO:0008150 biological_process; GO:0009058 biosynthetic process; IPR004551 Diphthine synthase
1519	1.19958	0.330479	0.5954	1	11.6667	14.6667	14.6	Root; GO:0008150 biological_process; GO:0042592 homeostatic process; IPR001519 Ferritin
17846	1.19929	0.330561	0.5954	1	16.5	18.3333	27.4	Root; GO:0008150 biological_process; GO:0009058 biosynthetic process; IPR017846 Nicotinate-nucleotide-dimethylbenzimidazole phosphoribosyltransferase, prokaryotic
6283	1.19925	0.330573	0.5954	1	15.8333	20.1667	23.6	Root; GO:0008150 biological_process; GO:0009058 biosynthetic process; IPR006283 Thiamine-monophosphate kinase
175	1.19861	0.330754	0.5954	1	35.6667	34.3333	42.4	Root; GO:0008150 biological_process; GO:0006810 transport; IPR000175 Sodium:neurotransmitter symporter
4607	1.19681	0.331262	0.5954	1	24.3333	27.6667	28.4	Root; GO:0008150 biological_process; GO:0009058 biosynthetic process; IPR004607 Phosphoribosylglycinamide formyltransferase
6396	1.19587	0.331529	0.5954	1	20	24.8333	26.4	Root; GO:0008150 biological_process; GO:0009056 catabolic process; IPR006396 Glutamate mutase epsilon subunit
13374	1.19586	0.33153	0.5954	1	8.66667	7.66667	6.2	Root; GO:0008150 biological_process; GO:0016043 cellular component organization; GO:0030031 cell projection assembly; IPR013374 ATPase, type IV, pilus assembly, PilB
28366	1.19551	0.331629	0.5954	1	24.6667	25	20.8	Root; GO:0008150 biological_process; GO:0042592 homeostatic process; IPR028366 Phosphate transport system protein PhoU
29767	1.19477	0.331841	0.5954	1	121.333	122.667	112.8	Root; GO:0008150 biological_process; GO:0006807 nitrogen compound metabolic process; IPR003331 UDP-N-acetylglucosamine 2-epimerase; IPR029767 UDP-N-acetylglucosamine 2-epimerase, WecB-type
23073	1.19284	0.332387	0.5954	1	3.5	4.5	5.4	Root; GO:0008150 biological_process; GO:0009058 biosynthetic process; IPR004805 DNA polymerase III, alpha subunit; IPR023073 DNA polymerase, error-prone
3802	1.18875	0.333551	0.59621	1	20	16.1667	14.8	Root; GO:0008150 biological_process; Other; IPR003802 Sporulation regulator WhiA
12756	1.18676	0.334118	0.59621	1	11.8333	15.6667	17.4	Root; GO:0008150 biological_process; GO:0006351 transcription, DNA-templated; IPR012756 DNA-directed RNA polymerase, subunit beta''
19998	1.1849	0.334651	0.59621	1	32.5	37.1667	41.2	Root; GO:0008150 biological_process; Other; IPR001708 Membrane insertase OXA1/ALB3/YidC; IPR019998 Membrane insertase YidC
1185	1.17535	0.337397	0.596862	1	15.3333	14	17.8	Root; GO:0008150 biological_process; GO:0006810 transport; IPR001185 Large-conductance mechanosensitive channel
15815	1.17292	0.338099	0.596862	1	13.3333	11	16.2	Root; GO:0008150 biological_process; GO:0055114 oxidation-reduction process; IPR015815 3-hydroxyisobutyrate dehydrogenase-related
5996	1.17239	0.338253	0.596862	1	9.66667	9.33333	7.2	Root; GO:0008150 biological_process; GO:0006412 translation; IPR005996 Ribosomal protein L30, bacterial-type
32463	1.17173	0.338446	0.596862	1	18.8333	17.5	12.8	Root; GO:0008150 biological_process; GO:0009058 biosynthetic process; IPR005714 ATPase, type III secretion system, FliI/YscN; IPR032463 ATPase, type III secretion system, FliI
1406	1.17104	0.338645	0.596862	1	40.5	47.8333	44.4	Root; GO:0008150 biological_process; GO:0016070 RNA metabolic process; IPR001406 Pseudouridine synthase I, TruA
8181	1.16589	0.340142	0.598432	1	15.6667	17.8333	19.4	Root; GO:0008150 biological_process; GO:0006807 nitrogen compound metabolic process; IPR008180 Deoxyuridine triphosphate nucleotidohydrolase/Deoxycytidine triphosphate deaminase; IPR008181 Deoxyuridine triphosphate nucleotidohydrolase
5732	1.15305	0.34391	0.602739	1	18.5	20.5	21.4	Root; GO:0008150 biological_process; GO:0006412 translation; IPR002222 Ribosomal protein S19/S15; IPR005732 Ribosomal protein S19, bacterial-type
5238	1.14716	0.345654	0.603449	1	4.5	6.5	7.6	Root; GO:0008150 biological_process; GO:0009058 biosynthetic process; IPR027639 ComB, archaeal; IPR005238 ComB-like
5747	1.14583	0.346051	0.603449	1	112.833	118.333	124.6	Root; GO:0008150 biological_process; Other; IPR005747 Endonuclease MutS2
10197	1.13816	0.348338	0.606367	1	5.16667	3.5	3.2	Root; GO:0008150 biological_process; Other; IPR001354 Mandelate racemase/muconate lactonizing enzyme/methylaspartate ammonia-lyase; IPR010197 o-succinylbenzoate synthase, MenC type 2
11818	1.12338	0.352801	0.612879	1	6	5.5	3.8	Root; GO:0008150 biological_process; GO:0009058 biosynthetic process; IPR011817 Uridylate kinase; IPR011818 Uridylate kinase, archaeal/spirochete, putative
8248	1.12111	0.353492	0.612879	1	21.1667	16	18.6	Root; GO:0008150 biological_process; GO:0006935 chemotaxis; IPR008248 Signal transduction response regulator, chemotaxis, CheB
23043	1.11963	0.353942	0.612879	1	3.33333	2.66667	2.6	Root; GO:0008150 biological_process; GO:0055114 oxidation-reduction process; IPR000440 NADH:ubiquinone/plastoquinone oxidoreductase, chain 3; IPR023043 NAD(P)H-quinone oxidoreductase subunit 3, bacterial/plastid
23484	1.10692	0.357846	0.616903	1	7.5	7.16667	5.4	Root; GO:0008150 biological_process; GO:0009058 biosynthetic process; IPR000812 Transcription factor TFIIB; IPR023484 Transcription initiation factor TFIIB, archaea
5929	1.10612	0.358092	0.616903	1	16.3333	19.5	13.4	Root; GO:0008150 biological_process; GO:0005975 carbohydrate metabolic process; IPR000577 Carbohydrate kinase, FGGY; IPR005929 Ribulokinase
30817	1.10528	0.358351	0.616903	1	7.5	4.83333	6.2	Root; GO:0008150 biological_process; GO:0005975 carbohydrate metabolic process; IPR030817 3,5/4-trihydroxycyclohexa-1,2-dione hydrolase
20621	1.10394	0.358766	0.616903	1	17.5	18.5	13.8	Root; GO:0008150 biological_process; GO:0009058 biosynthetic process; IPR001348 ATP phosphoribosyltransferase HisG; IPR020621 ATP phosphoribosyltransferase HisG, long form
15655	1.09984	0.360041	0.618019	1	26.5	24	22.2	Root; GO:0008150 biological_process; GO:0019538 protein metabolic process; IPR015655 Protein phosphatase 2C family
6399	1.09481	0.361609	0.619633	1	3.66667	2.33333	2	Root; GO:0008150 biological_process; GO:0009058 biosynthetic process; IPR002180 6,7-dimethyl-8-ribityllumazine synthase; IPR006399 Riboflavin synthase, archaeal
3783	1.09085	0.362849	0.620679	1	9.16667	8.66667	12.2	Root; GO:0008150 biological_process; Other; IPR003783 Regulatory protein RecX
13477	1.0888	0.363494	0.620707	1	5.66667	4	4	Root; GO:0008150 biological_process; GO:0009058 biosynthetic process; IPR013477 Homocitrate synthase NifV-type
90	1.08619	0.364318	0.621039	1	20.6667	16.8333	13.6	Root; GO:0008150 biological_process; GO:0048870 cell motility; IPR000090 Flagellar motor switch protein FliG
19928	1.08235	0.365531	0.622033	1	6.66667	6.83333	4.2	Root; GO:0008150 biological_process; GO:0006412 translation; IPR000597 Ribosomal protein L3; IPR019928 Ribosomal protein L3, archaeal
12052	1.07416	0.368134	0.625385	1	18	14.6667	11.6	Root; GO:0008150 biological_process; Other; IPR012052 Sporulation transcription factor Spo0A
5741	1.06236	0.371922	0.628885	1	14.5	16	20.2	Root; GO:0008150 biological_process; GO:0016043 cellular component organization; IPR005741 DNA topoisomerase IV subunit A, Gram-positive
85	1.06056	0.372503	0.628885	1	25.6667	28.8333	28.4	Root; GO:0008150 biological_process; GO:0006259 DNA metabolic process; IPR000085 Bacterial DNA recombination protein RuvA
6368	1.06044	0.372541	0.628885	1	17	14.1667	13.4	Root; GO:0008150 biological_process; GO:0006807 nitrogen compound metabolic process; IPR006368 GDP-mannose 4,6-dehydratase
14445	1.03446	0.381057	0.641815	1	50.3333	43.3333	44.8	Root; GO:0008150 biological_process; GO:0009058 biosynthetic process; IPR003694 NAD(+) synthetase; IPR014445 Glutamine-dependent NAD(+) synthetase
11961	1.02808	0.383181	0.642509	1	13.1667	11.3333	14.6	Root; GO:0008150 biological_process; GO:0016070 RNA metabolic process; IPR011961 16S rRNA processing protein RimM
23539	1.0249	0.384244	0.642509	1	3	2.33333	1.6	Root; GO:0008150 biological_process; GO:0016070 RNA metabolic process; IPR002738 RNase P subunit p30; IPR023539 Ribonuclease P, protein component 3, archaeal
682	1.02437	0.384422	0.642509	1	21.6667	23.6667	29.2	Root; GO:0008150 biological_process; GO:0019538 protein metabolic process; IPR000682 Protein-L-isoaspartate(D-aspartate) O-methyltransferase
10140	1.02347	0.384724	0.642509	1	21.3333	24	25	Root; GO:0008150 biological_process; GO:0009058 biosynthetic process; IPR010140 Histidinol phosphate phosphatase, HisJ
4559	1.01769	0.38667	0.643485	1	44.8333	47.5	51.8	Root; GO:0008150 biological_process; GO:0009058 biosynthetic process; IPR004559 Coproporphyrinogen III oxidase, oxygen-independent related
22981	1.0141	0.387886	0.643485	1	3.66667	3	2.8	Root; GO:0008150 biological_process; GO:0006412 translation; IPR001197 Ribosomal protein L10e; IPR022981 Ribosomal protein L10e, archaea
5286	1.01325	0.388172	0.643485	1	17.5	17.5	13.8	Root; GO:0008150 biological_process; GO:0051301 cell division; IPR005286 Cell division protein FtsE, ATP-binding
18330	1.00959	0.389417	0.643485	1	9.66667	8.33333	12.4	Root; GO:0008150 biological_process; GO:0006259 DNA metabolic process; IPR018330 RecT family
7485	1.00916	0.389561	0.643485	1	9.33333	10.8333	11.8	Root; GO:0008150 biological_process; GO:0016043 cellular component organization; IPR007485 LPS-assembly lipoprotein LptE
5672	1.00856	0.389768	0.643485	1	37	39.8333	43.2	Root; GO:0008150 biological_process; GO:0006810 transport; GO:0006811 ion transport; IPR005672 Phosphate transport system permease protein PstA
4085	1.00825	0.389873	0.643485	1	8.66667	9	6.6	Root; GO:0008150 biological_process; GO:0009056 catabolic process; IPR002815 Spo11/DNA topoisomerase VI subunit A; IPR004085 DNA topoisomerase VI, subunit A
20566	1.00289	0.391703	0.645428	1	9.33333	7.16667	6.6	Root; GO:0008150 biological_process; GO:0009058 biosynthetic process; IPR020566 Histidine biosynthesis bifunctional protein HisB
10189	0.997687	0.393491	0.647293	1	4.5	3.83333	2.2	Root; GO:0008150 biological_process; GO:0009058 biosynthetic process; IPR010189 Shikimate kinase, archaea
19907	0.99569	0.39418	0.647347	1	5	4	2.8	Root; GO:0008150 biological_process; GO:0006412 translation; IPR000702 Ribosomal protein L6; IPR019907 Ribosomal protein L6P, archaea
5673	0.988952	0.396513	0.650097	1	6.33333	4.5	4.6	Root; GO:0008150 biological_process; GO:0006810 transport; GO:0006811 ion transport; IPR005673 ABC transporter, phosphate-binding protein PstS
16585	0.985573	0.397689	0.650944	1	18	22.3333	22.6	Root; GO:0008150 biological_process; GO:0055114 oxidation-reduction process; IPR015417 Glycine/sarcosine/betaine reductase complex, protein B, subunit alpha/ beta; IPR016585 Glycine/sarcosine/betaine reductase, component B, fused alpha/beta
20888	0.983345	0.398467	0.651137	1	3.33333	6	5.8	Root; GO:0008150 biological_process; Other; IPR020888 Ribulose bisphosphate carboxylase, large subunit
3317	0.980572	0.399437	0.651643	1	10.8333	14.3333	16.4	Root; GO:0008150 biological_process; GO:0055114 oxidation-reduction process; IPR003317 Cytochrome ubiquinol oxidase subunit 2
20889	0.969639	0.403288	0.656383	1	3.5	3.16667	2.2	Root; GO:0008150 biological_process; GO:0016043 cellular component organization; IPR020889 LPS-assembly protein LptD
3717	0.968556	0.403672	0.656383	1	14.5	13.1667	17	Root; GO:0008150 biological_process; GO:0006259 DNA metabolic process; IPR003717 Recombination protein O, RecO
4673	0.957486	0.40762	0.661711	1	6	4.66667	4.2	Root; GO:0008150 biological_process; GO:0006810 transport; IPR004673 L-rhamnose-proton symport, RhaT
5721	0.951807	0.409662	0.662509	1	3.33333	3.16667	2.4	Root; GO:0008150 biological_process; GO:0006412 translation; IPR001063 Ribosomal protein L22/L17; IPR005721 Ribosomal protein L22/L17, eukaryotic/archaeal
11167	0.95092	0.409982	0.662509	1	22.1667	23.5	32.6	Root; GO:0008150 biological_process; GO:0006091 generation of precursor metabolites and energy; IPR011167 Iron-dependent fumarate hydratase
12094	0.949757	0.410402	0.662509	1	43	48.5	47	Root; GO:0008150 biological_process; GO:0016070 RNA metabolic process; IPR012094 tRNA(Ile)-lysidine synthase
6319	0.946813	0.411467	0.662509	1	23.6667	22.8333	16.8	Root; GO:0008150 biological_process; GO:0044281 small molecule metabolic process; IPR006319 Phosphoenolpyruvate synthase
5765	0.94299	0.412856	0.662984	1	30.1667	31.6667	36.8	Root; GO:0008150 biological_process; GO:0009058 biosynthetic process; IPR005765 Uracil phosphoribosyl transferase
4753	0.942304	0.413105	0.662984	1	81.1667	86.1667	92.4	Root; GO:0008150 biological_process; GO:0016043 cellular component organization; GO:0000902 cell morphogenesis; IPR004753 Cell shape determining protein MreB/Mrl
7537	0.938192	0.414605	0.664311	1	2.83333	3.5	1.8	Root; GO:0008150 biological_process; GO:0016070 RNA metabolic process; IPR007537 tRNAHis guanylyltransferase Thg1
22876	0.932323	0.416757	0.665643	1	26.6667	29.3333	31	Root; GO:0008150 biological_process; Other; IPR022876 Redox-sensing transcriptional repressor Rex
17570	0.929848	0.417669	0.665643	1	2.16667	2.66667	1.6	Root; GO:0008150 biological_process; GO:0006807 nitrogen compound metabolic process; IPR003321 Cytochrome c552; IPR017570 Formate-dependent cytochrome c nitrite reductase, c552 subunit
5785	0.928389	0.418207	0.665643	1	11.5	11.5	8.2	Root; GO:0008150 biological_process; Other; IPR001544 Aminotransferase class IV; IPR005785 Branched-chain amino acid aminotransferase I
30867	0.927761	0.418439	0.665643	1	4.66667	5.16667	2.8	Root; GO:0008150 biological_process; GO:0016070 RNA metabolic process; IPR030867 tRNA(Phe) (4-demethylwyosine(37)-C(7)) aminocarboxypropyltransferase
5675	0.926762	0.418809	0.665643	1	27.1667	21.3333	18.4	Root; GO:0008150 biological_process; GO:0044281 small molecule metabolic process; IPR005675 Citramalate synthase
14732	0.924887	0.419503	0.665674	1	10.6667	8	10	Root; GO:0008150 biological_process; GO:0009058 biosynthetic process; IPR014732 Orotidine 5'-phosphate decarboxylase
13384	0.918854	0.421745	0.667425	1	14.6667	13	11	Root; GO:0008150 biological_process; GO:0048870 cell motility; IPR013384 Flagellar hook-associated protein 3
889	0.918281	0.421959	0.667425	1	8.5	6.5	5.2	Root; GO:0008150 biological_process; GO:0055114 oxidation-reduction process; IPR000889 Glutathione peroxidase
3805	0.91063	0.424824	0.670882	1	10.1667	9.5	13.8	Root; GO:0008150 biological_process; GO:0009058 biosynthetic process; IPR003805 Adenosylcobinamide-GDP ribazoletransferase
4772	0.907372	0.426051	0.671744	1	88.5	91.1667	80.4	Root; GO:0008150 biological_process; GO:0006810 transport; GO:0006811 ion transport; IPR003445 Cation transporter; IPR004772 TrkH potassium transport family
17705	0.892845	0.43157	0.679361	1	89.3333	91.3333	100.8	Root; GO:0008150 biological_process; GO:0009056 catabolic process; IPR017705 Ribonuclease Y
11537	0.888565	0.433212	0.680144	1	6.83333	9.16667	8.8	Root; GO:0008150 biological_process; GO:0055114 oxidation-reduction process; IPR011537 NADH ubiquinone oxidoreductase, F subunit
4790	0.887175	0.433746	0.680144	1	12.5	12.5	9.6	Root; GO:0008150 biological_process; GO:0055114 oxidation-reduction process; IPR004790 Isocitrate dehydrogenase NADP-dependent
23521	0.886167	0.434135	0.680144	1	5.33333	6.33333	4.8	Root; GO:0008150 biological_process; GO:0009056 catabolic process; IPR004405 Translation release factor pelota; IPR023521 Translation release factor pelota, archaea
1684	0.88154	0.435922	0.681862	1	18.3333	20.1667	18.2	Root; GO:0008150 biological_process; GO:0006412 translation; IPR001684 Ribosomal protein L27
30192	0.876376	0.437926	0.682885	1	21.1667	21.5	26.8	Root; GO:0008150 biological_process; GO:0006810 transport; IPR006685 Mechanosensitive ion channel MscS; IPR030192 Miniconductance mechanosensitive channel YbdG
12426	0.876262	0.437971	0.682885	1	2.16667	2.83333	1.8	Root; GO:0008150 biological_process; GO:0016043 cellular component organization; IPR007561 Cell division protein SepF/SepF-related; IPR012426 Uncharacterised protein family SepF-related, archaea
30676	0.873394	0.439089	0.682885	1	6.16667	6.66667	4.6	Root; GO:0008150 biological_process; GO:0006810 transport; GO:0006811 ion transport; IPR001898 Sodium/sulphate symporter; IPR030676 Citrate carrier CitT-related
6282	0.872158	0.439572	0.682885	1	13.3333	12.6667	10.6	Root; GO:0008150 biological_process; GO:0006807 nitrogen compound metabolic process; IPR006282 Thiamin pyrophosphokinase
1937	0.870973	0.440035	0.682885	1	14.3333	13.1667	12.2	Root; GO:0008150 biological_process; GO:0005975 carbohydrate metabolic process; IPR001937 Galactose-1-phosphate uridyl transferase, class I
8229	0.86749	0.441401	0.683929	1	6.66667	6.83333	4.8	Root; GO:0008150 biological_process; GO:0016070 RNA metabolic process; IPR008229 tRNA nucleotidyltransferase, archaea
110	0.864395	0.442618	0.68474	1	90.1667	102.5	98.4	Root; GO:0008150 biological_process; GO:0006412 translation; IPR000110 Ribosomal protein S1
3444	0.857034	0.445529	0.686672	1	18.1667	15.3333	18.6	Root; GO:0008150 biological_process; Other; IPR003444 Transcriptional regulator MraZ
292	0.855989	0.445944	0.686672	1	14	11.6667	13.6	Root; GO:0008150 biological_process; GO:0006810 transport; IPR000292 Formate/nitrite transporter
6303	0.855071	0.446309	0.686672	1	7.66667	6.5	5	Root; GO:0008150 biological_process; GO:0006810 transport; IPR002010 Type III secretion system inner membrane R protein; IPR006303 Flagellar biosynthesis protein FliR
14816	0.854214	0.44665	0.686672	1	2.66667	3.66667	4.2	Root; GO:0008150 biological_process; GO:0016070 RNA metabolic process; IPR014816 tRNA (1-methyladenosine) methyltransferase catalytic subunit Gcd14
5995	0.849179	0.448659	0.687926	1	82.1667	77.1667	69.4	Root; GO:0008150 biological_process; GO:0005975 carbohydrate metabolic process; IPR005995 Phosphoglycerate mutase, 2,3-bisphosphoglycerate-independent
4618	0.848679	0.448859	0.687926	1	27.1667	24	21.6	Root; GO:0008150 biological_process; GO:0009058 biosynthetic process; IPR004618 Aspartate--ammonia ligase
28630	0.837384	0.453407	0.693819	1	74.6667	82.3333	72.4	Root; GO:0008150 biological_process; GO:0009058 biosynthetic process; IPR028630 RNA polymerase sigma factor RpoD
5897	0.830078	0.456377	0.697282	1	9	9	6.4	Root; GO:0008150 biological_process; GO:0006810 transport; IPR005897 Peptidase C39, ABC-type bacteriocin transporter
5769	0.822683	0.459406	0.700243	1	11.8333	13	9.4	Root; GO:0008150 biological_process; GO:0006810 transport; IPR005769 ABC transporter, permease PhnE/PtxC
30874	0.821111	0.460052	0.700243	1	29.8333	31	24.2	Root; GO:0008150 biological_process; GO:0009058 biosynthetic process; IPR022924 Cardiolipin synthase; IPR030874 Cardiolipin synthase, Firmicutes-type
3732	0.820162	0.460443	0.700243	1	23.3333	21.3333	25.6	Root; GO:0008150 biological_process; GO:0009056 catabolic process; IPR003732 D-aminoacyl-tRNA deacylase DTD
17629	0.817096	0.461709	0.701087	1	4	3.33333	2.8	Root; GO:0008150 biological_process; GO:0009056 catabolic process; IPR017629 4-hydroxy-2-oxovalerate aldolase
22861	0.814328	0.462855	0.701747	1	85.6667	88.1667	93.2	Root; GO:0008150 biological_process; GO:0006520 cellular amino acid metabolic process; IPR000924 Glutamyl/glutaminyl-tRNA synthetase; IPR004514 Glutamine-tRNA synthetase; IPR022861 Glutamine-tRNA ligase, bacterial
5838	0.804741	0.466849	0.705873	1	11.5	11.3333	7.4	Root; GO:0008150 biological_process; GO:0006810 transport; GO:0009306 protein secretion; IPR005838 Type III secretion system inner membrane P protein
4398	0.804366	0.467006	0.705873	1	20.8333	22.8333	24.2	Root; GO:0008150 biological_process; GO:0016070 RNA metabolic process; IPR004398 RNA methyltransferase, RsmD
5992	0.798861	0.469319	0.707695	1	1.16667	1.83333	1.8	Root; GO:0008150 biological_process; GO:0055114 oxidation-reduction process; IPR005992 IMP dehydrogenase-related 2
115	0.798086	0.469646	0.707695	1	65.6667	70.8333	70.6	Root; GO:0008150 biological_process; GO:0009058 biosynthetic process; IPR000115 Phosphoribosylglycinamide synthetase
709	0.796374	0.470368	0.707703	1	62.5	62.1667	54.2	Root; GO:0008150 biological_process; GO:0006810 transport; GO:0006811 ion transport; IPR000709 Leu/Ile/Val-binding protein
3414	0.793754	0.471476	0.70829	1	29.3333	33.6667	38.8	Root; GO:0008150 biological_process; GO:0009058 biosynthetic process; IPR003414 Polyphosphate kinase
28614	0.783815	0.475706	0.713559	1	14.3333	11.5	15.6	Root; GO:0008150 biological_process; GO:0009058 biosynthetic process; IPR028614 GDP-L-fucose synthase
9212	0.781098	0.47687	0.71422	1	3.16667	2.66667	2.2	Root; GO:0008150 biological_process; GO:0009058 biosynthetic process; IPR009212 Methylthioribose kinase
5894	0.776228	0.478964	0.715754	1	44.6667	51.1667	50.2	Root; GO:0008150 biological_process; GO:0006810 transport; GO:0006811 ion transport; IPR005894 Daunorubicin resistance ABC transporter ATP-binding subunit DrrA
30158	0.774317	0.479789	0.715754	1	4.33333	4.5	3.6	Root; GO:0008150 biological_process; GO:0006810 transport; IPR001851 ABC transporter, permease; IPR030158 Galactoside transport system permease protein MglC
7544	0.772149	0.480727	0.715754	1	3.66667	3.16667	2.8	Root; GO:0008150 biological_process; GO:0006950 response to stress; IPR007544 Encapsulating protein for peroxidase
5200	0.771991	0.480795	0.715754	1	8.66667	13.8333	9	Root; GO:0008150 biological_process; GO:0009056 catabolic process; IPR005200 Endo-1,3(4)-beta-glucanase
19045	0.767546	0.482725	0.717544	1	6.16667	8.16667	10.6	Root; GO:0008150 biological_process; GO:0006259 DNA metabolic process; IPR019045 Restriction endonuclease, type II, TdeIII
3447	0.764123	0.484216	0.718679	1	28.1667	34.1667	28.8	Root; GO:0008150 biological_process; GO:0009058 biosynthetic process; IPR003447 FemABX peptidyl transferase
20594	0.756978	0.487347	0.72224	1	26.3333	28	31.6	Root; GO:0008150 biological_process; GO:0006412 translation; IPR000244 Ribosomal protein L9; IPR020594 Ribosomal protein L9, bacteria/chloroplast
17879	0.754701	0.48835	0.72264	1	32.3333	35.6667	38.6	Root; GO:0008150 biological_process; GO:0006810 transport; IPR017879 ABC transporter, spermidine/putrescine import ATP-binding protein, PotA
3762	0.751678	0.489684	0.723531	1	48	45.3333	37.6	Root; GO:0008150 biological_process; Other; IPR003762 L-arabinose isomerase
3679	0.746514	0.491974	0.725297	1	4.83333	6.33333	6.4	Root; GO:0008150 biological_process; Other; IPR003679 Aminoglycoside 3-N-acetyltransferase
544	0.74567	0.492349	0.725297	1	9.16667	8.66667	11.4	Root; GO:0008150 biological_process; GO:0009058 biosynthetic process; IPR000544 Octanoyltransferase
11962	0.742497	0.493763	0.726296	1	6	5.16667	6.6	Root; GO:0008150 biological_process; GO:0006807 nitrogen compound metabolic process; IPR008180 Deoxyuridine triphosphate nucleotidohydrolase/Deoxycytidine triphosphate deaminase; IPR011962 Deoxycytidine triphosphate deaminase
2661	0.73643	0.49648	0.728522	1	32	35.1667	35.2	Root; GO:0008150 biological_process; GO:0006412 translation; IPR002661 Ribosome recycling factor
1697	0.735824	0.496753	0.728522	1	59.3333	59	52.4	Root; GO:0008150 biological_process; GO:0005975 carbohydrate metabolic process; IPR001697 Pyruvate kinase
5745	0.732916	0.498062	0.729358	1	26	28.1667	28	Root; GO:0008150 biological_process; GO:0006412 translation; IPR000218 Ribosomal protein L14b/L23e; IPR005745 Ribosomal protein L14, bacterial-type
2695	0.726838	0.500811	0.731452	1	82.6667	90.3333	89	Root; GO:0008150 biological_process; GO:0009058 biosynthetic process; IPR002695 AICARFT/IMPCHase bienzyme
5759	0.724988	0.501651	0.731452	1	55.6667	60.8333	61.4	Root; GO:0008150 biological_process; GO:0006259 DNA metabolic process; IPR005759 Endonuclease III
1046	0.724282	0.501972	0.731452	1	7.66667	6.33333	10.4	Root; GO:0008150 biological_process; GO:0006810 transport; IPR001046 NRAMP family
12837	0.723217	0.502457	0.731452	1	14	11.1667	14.6	Root; GO:0008150 biological_process; GO:0055114 oxidation-reduction process; IPR012837 Ribonucleoside-triphosphate reductase activating, anaerobic
13853	0.717665	0.504992	0.734061	1	3.83333	5	5.6	Root; GO:0008150 biological_process; GO:0006810 transport; IPR004703 Phosphotransferase system, sugar-specific permease component; IPR013853 Galactitol permease IIC component
13005	0.704175	0.511215	0.742013	1	36.3333	38	39.8	Root; GO:0008150 biological_process; GO:0006412 translation; IPR002136 Ribosomal protein L4/L1e; IPR013005 50S ribosomal protein uL4
3755	0.702094	0.512183	0.742326	1	29.6667	31.1667	26.2	Root; GO:0008150 biological_process; GO:0007165 signal transduction; GO:0000160 phosphorelay signal transduction system; IPR003755 HPr(Ser) kinase/phosphorylase
21137	0.697077	0.514524	0.744626	1	8.5	8	10.2	Root; GO:0008150 biological_process; GO:0006412 translation; IPR021137 Ribosomal protein L35
15443	0.694533	0.515716	0.745258	1	36	37.1667	40.8	Root; GO:0008150 biological_process; GO:0005975 carbohydrate metabolic process; IPR008183 Aldose 1-/Glucose-6-phosphate 1-epimerase; IPR015443 Aldose 1-epimerase
20004	0.68661	0.519448	0.749555	1	4	5.33333	4.6	Root; GO:0008150 biological_process; GO:0006807 nitrogen compound metabolic process; IPR003331 UDP-N-acetylglucosamine 2-epimerase; IPR020004 UDP-N-acetylglucosamine 2-epimerase,UDP-hydrolysing
26082	0.68148	0.521882	0.751967	1	3.66667	4.16667	3	Root; GO:0008150 biological_process; GO:0006810 transport; IPR026082 ABC transporter A, ABCA
4643	0.679209	0.522963	0.752426	1	8.33333	8.83333	11	Root; GO:0008150 biological_process; GO:0009058 biosynthetic process; IPR004643 Iron-sulphur-dependent L-serine dehydratase beta subunit
22943	0.673197	0.525838	0.755462	1	6.16667	7.5	8.4	Root; GO:0008150 biological_process; GO:0006810 transport; IPR001901 Protein translocase complex, SecE/Sec61-gamma subunit; IPR008158 Protein translocase SEC61 complex, gamma subunit; IPR022943 Preprotein translocase subunit SecE
5758	0.670181	0.527287	0.756442	1	64.1667	68.8333	67.2	Root; GO:0008150 biological_process; GO:0009058 biosynthetic process; IPR005758 UDP-N-acetylmuramate--L-alanine ligase
3720	0.667343	0.528655	0.757304	1	39.3333	36.5	37.2	Root; GO:0008150 biological_process; GO:0016070 RNA metabolic process; IPR003720 tRNA sulfurtransferase ThiI
1852	0.663753	0.530391	0.757791	1	18	19.5	23	Root; GO:0008150 biological_process; GO:0009058 biosynthetic process; IPR001852 Pyridoxal 5'-phosphate synthase subunit PdxS/SNZ
19874	0.663332	0.530594	0.757791	1	36.1667	34.3333	39	Root; GO:0008150 biological_process; GO:0019538 protein metabolic process; IPR004556 Modification methylase HemK; IPR019874 Protein-(glutamine-N5) methyltransferase, release factor-specific
6793	0.661882	0.531298	0.757791	1	6	8	6.2	Root; GO:0008150 biological_process; Other; IPR006793 FaeA-like protein
12724	0.657274	0.53354	0.75895	1	78.1667	76.6667	84.8	Root; GO:0008150 biological_process; GO:0006950 response to stress; IPR012724 Chaperone DnaJ
4429	0.652681	0.535786	0.75895	1	26.3333	21.6667	21.2	Root; GO:0008150 biological_process; GO:0055114 oxidation-reduction process; IPR001804 Isocitrate and isopropylmalate dehydrogenases family; IPR004429 Isopropylmalate dehydrogenase
17770	0.6514	0.536414	0.75895	1	5.83333	6.16667	4.2	Root; GO:0008150 biological_process; GO:0016070 RNA metabolic process; IPR000228 RNA 3'-terminal phosphate cyclase; IPR017770 RNA 3'-terminal phosphate cyclase type 1
3561	0.651396	0.536416	0.75895	1	6.5	6.16667	4.6	Root; GO:0008150 biological_process; GO:0006259 DNA metabolic process; IPR003561 Mutator MutT
23332	0.649957	0.537123	0.75895	1	5.16667	5.66667	4.4	Root; GO:0008150 biological_process; GO:0019538 protein metabolic process; IPR001353 Proteasome, subunit alpha/beta; IPR023332 Proteasome A-type subunit
14606	0.64896	0.537613	0.75895	1	15.5	15.5	20.6	Root; GO:0008150 biological_process; Other; IPR001174 Galactokinase/homoserine kinase; IPR014606 D,D-heptose 7-phosphate kinase
11179	0.644535	0.539795	0.75895	1	10.6667	13	14	Root; GO:0008150 biological_process; GO:0009058 biosynthetic process; IPR011179 Isopentenyl-diphosphate delta-isomerase, FMN-dependent
4797	0.644221	0.53995	0.75895	1	20.5	20.8333	18	Root; GO:0008150 biological_process; GO:0007154 cell communication; IPR004797 Competence protein ComEC/Rec2
7593	0.64345	0.540331	0.75895	1	2.5	2.33333	3.4	Root; GO:0008150 biological_process; Other; IPR007593 CD225/Dispanin family
5717	0.642675	0.540715	0.75895	1	35.8333	32.6667	36.4	Root; GO:0008150 biological_process; GO:0006412 translation; IPR000235 Ribosomal protein S5/S7; IPR005717 Ribosomal protein S7, bacterial/organellar-type
10462	0.642447	0.540828	0.75895	1	2.83333	4.5	3.4	Root; GO:0008150 biological_process; GO:0009058 biosynthetic process; IPR010462 Ectoine synthase
5886	0.641418	0.541338	0.75895	1	32.3333	30.3333	29	Root; GO:0008150 biological_process; GO:0005975 carbohydrate metabolic process; IPR005886 UDP-glucose 4-epimerase GalE
417	0.636676	0.543695	0.761174	1	16	15	11.6	Root; GO:0008150 biological_process; GO:0009058 biosynthetic process; IPR000417 Hydroxyethylthiazole kinase
27548	0.633379	0.545341	0.762397	1	3.33333	3	2.2	Root; GO:0008150 biological_process; GO:0006412 translation; IPR001266 Ribosomal protein S19e; IPR027548 Ribosomal protein S19e, archaeal
23684	0.629447	0.547312	0.764069	1	5.33333	4.83333	4.2	Root; GO:0008150 biological_process; GO:0006520 cellular amino acid metabolic process; IPR002305 Aminoacyl-tRNA synthetase, class Ic; IPR002307 Tyrosine-tRNA ligase; IPR023617 Tyrosine-tRNA ligase, archaeal/eukaryotic-type; IPR023684 Tyrosine-tRNA ligase, type 3
28357	0.62101	0.551567	0.768233	1	86.5	80	84.8	Root; GO:0008150 biological_process; GO:0055114 oxidation-reduction process; IPR017476 UDP-glucose/GDP-mannose dehydrogenase; IPR028357 UDP-glucose 6-dehydrogenase, bacterial type
3698	0.62045	0.551851	0.768233	1	15.1667	17.8333	17.6	Root; GO:0008150 biological_process; GO:0009058 biosynthetic process; IPR003698 Lipoyl synthase
1648	0.617525	0.553336	0.768911	1	14.1667	16.3333	17	Root; GO:0008150 biological_process; GO:0006412 translation; IPR001648 Ribosomal protein S18
14154	0.616424	0.553896	0.768911	1	6.83333	5.33333	5.4	Root; GO:0008150 biological_process; Other; IPR014154 GTP-sensing transcriptional pleiotropic repressor CodY
2043	0.613217	0.555532	0.770098	1	22.6667	23.5	26.6	Root; GO:0008150 biological_process; GO:0006259 DNA metabolic process; IPR002043 Uracil-DNA glycosylase
101	0.609001	0.55769	0.771689	1	22.1667	25.6667	25.6	Root; GO:0008150 biological_process; GO:0006807 nitrogen compound metabolic process; IPR000101 Gamma-glutamyltranspeptidase
3489	0.60702	0.558707	0.771689	1	22.6667	22.5	25.2	Root; GO:0008150 biological_process; Other; IPR003489 Ribosomal protein S30Ae/sigma 54 modulation protein
13482	0.606403	0.559025	0.771689	1	7.66667	7.16667	6.2	Root; GO:0008150 biological_process; GO:0009058 biosynthetic process; IPR013482 Molybdenum cofactor guanylyltransferase
17702	0.603457	0.560543	0.771701	1	17.6667	13.3333	15.6	Root; GO:0008150 biological_process; GO:0006520 cellular amino acid metabolic process; IPR006130 Aspartate/ornithine carbamoyltransferase; IPR017702 Putative carbamoyltransferase YgeW
2583	0.599171	0.562759	0.771701	1	10.1667	11	12.6	Root; GO:0008150 biological_process; GO:0006412 translation; IPR002583 Ribosomal protein S20
4464	0.599143	0.562774	0.771701	1	6.66667	6.5	9.8	Root; GO:0008150 biological_process; GO:0009058 biosynthetic process; IPR004464 Fructose-1,6-bisphosphatase class 2/Sedoheputulose-1,7-bisphosphatase
5882	0.598966	0.562866	0.771701	1	36.6667	40.6667	42.4	Root; GO:0008150 biological_process; GO:0009058 biosynthetic process; IPR005882 Bifunctional UDP-N-acetylglucosamine pyrophosphorylase/glucosamine-1-phosphate N-acetyltransferase
11275	0.598818	0.562943	0.771701	1	4.66667	6.5	7.4	Root; GO:0008150 biological_process; GO:0055114 oxidation-reduction process; IPR001557 L-lactate/malate dehydrogenase; IPR011275 Malate dehydrogenase, type 3
10045	0.596952	0.563911	0.771956	1	27	25.8333	29.8	Root; GO:0008150 biological_process; GO:0009058 biosynthetic process; IPR010045 Phosphopentomutase
4506	0.593955	0.565471	0.772971	1	72.5	78.5	78.8	Root; GO:0008150 biological_process; GO:0016070 RNA metabolic process; IPR004506 tRNA-specific 2-thiouridylase
1977	0.59251	0.566225	0.772971	1	19.1667	21.8333	21.2	Root; GO:0008150 biological_process; GO:0009058 biosynthetic process; IPR001977 Dephospho-CoA kinase
4473	0.591022	0.567002	0.772971	1	135.167	124.333	127	Root; GO:0008150 biological_process; GO:0006259 DNA metabolic process; IPR004473 Restriction endonuclease, type I, HsdR
4090	0.585884	0.569696	0.774504	1	88.6667	74	72.6	Root; GO:0008150 biological_process; GO:0006935 chemotaxis; IPR004090 Chemotaxis methyl-accepting receptor
24694	0.581462	0.572026	0.776602	1	19.8333	22.6667	22.6	Root; GO:0008150 biological_process; GO:0009058 biosynthetic process; IPR024694 N5-carboxyaminoimidazole ribonucleotide mutase PurE
1492	0.578151	0.573778	0.777832	1	34.8333	30.3333	28.4	Root; GO:0008150 biological_process; GO:0048870 cell motility; IPR001492 Flagellin
473	0.576773	0.574508	0.777832	1	6	7	7.8	Root; GO:0008150 biological_process; GO:0006412 translation; IPR000473 Ribosomal protein L36
4627	0.57308	0.576472	0.779422	1	8.66667	7.5	9.2	Root; GO:0008150 biological_process; GO:0055114 oxidation-reduction process; IPR002085 Alcohol dehydrogenase superfamily, zinc-type; IPR004627 L-threonine 3-dehydrogenase
28359	0.569516	0.578375	0.780925	1	103.833	102.667	113.2	Root; GO:0008150 biological_process; GO:0055114 oxidation-reduction process; IPR017476 UDP-glucose/GDP-mannose dehydrogenase; IPR028359 UDP-N-acetyl-D-mannosamine/glucosamine dehydrogenase
2582	0.565573	0.580489	0.782088	1	11	13.3333	12.4	Root; GO:0008150 biological_process; GO:0009058 biosynthetic process; IPR002582 Holo-[acyl carrier protein] synthase
1891	0.564953	0.580821	0.782088	1	46.3333	44.8333	40.2	Root; GO:0008150 biological_process; GO:0055114 oxidation-reduction process; IPR001891 Malic oxidoreductase
1463	0.557981	0.584582	0.78345	1	46.1667	39.3333	43.6	Root; GO:0008150 biological_process; GO:0006810 transport; GO:0006811 ion transport; IPR001463 Sodium:alanine symporter
12079	0.556302	0.585492	0.78345	1	30.1667	29.3333	24.4	Root; GO:0008150 biological_process; GO:0055114 oxidation-reduction process; IPR012079 Bifunctional aldehyde-alcohol dehydrogenase
17562	0.555333	0.586018	0.78345	1	9	8.83333	13	Root; GO:0008150 biological_process; GO:0016043 cellular component organization; IPR017562 Cytochrome c-type biogenesis protein CcsA
67	0.554251	0.586606	0.78345	1	13.5	11.8333	11.2	Root; GO:0008150 biological_process; GO:0048870 cell motility; IPR000067 Flagellar M-ring protein FliF
2196	0.554138	0.586668	0.78345	1	3.5	4.83333	5	Root; GO:0008150 biological_process; GO:0009056 catabolic process; IPR002196 Glycoside hydrolase, family 24
10074	0.552856	0.587365	0.78345	1	53	58	48.6	Root; GO:0008150 biological_process; GO:0009058 biosynthetic process; IPR010074 Phosphoribosylformylglycinamidine subunit PurL
26033	0.552811	0.587389	0.78345	1	2.5	2.5	3.4	Root; GO:0008150 biological_process; GO:0006810 transport; IPR006043 Xanthine/uracil/vitamin C permease; IPR029940 AzgA purine transporter; IPR026033 Purine permease PbuG-like
1249	0.544284	0.592052	0.788245	1	9.33333	7	8.4	Root; GO:0008150 biological_process; GO:0009058 biosynthetic process; IPR001249 Acetyl-CoA biotin carboxyl carrier
2677	0.542654	0.592948	0.788245	1	10.5	12.6667	12.4	Root; GO:0008150 biological_process; GO:0006412 translation; IPR002677 Ribosomal protein L32p
5713	0.539354	0.594768	0.788245	1	3	2.5	2	Root; GO:0008150 biological_process; GO:0006412 translation; IPR002222 Ribosomal protein S19/S15; IPR005713 Ribosomal protein S19A/S15e
527	0.537716	0.595673	0.788245	1	2.5	3.5	2	Root; GO:0008150 biological_process; GO:0048870 cell motility; IPR000527 Flagellar L-ring protein
23457	0.535215	0.597058	0.788245	1	65.6667	71.6667	74.4	Root; GO:0008150 biological_process; GO:0006520 cellular amino acid metabolic process; IPR015413 Methionyl/Leucyl tRNA synthetase; IPR014758 Methionyl-tRNA synthetase; IPR023457 Methionine-tRNA synthetase, type 2
16914	0.535092	0.597127	0.788245	1	16.3333	19	16	Root; GO:0008150 biological_process; GO:0016070 RNA metabolic process; IPR016914 tRNA (cytidine/uridine-2'-O-)-methyltransferase
5727	0.534434	0.597491	0.788245	1	24.1667	24.8333	27.2	Root; GO:0008150 biological_process; GO:0006412 translation; IPR001063 Ribosomal protein L22/L17; IPR005727 Ribosomal protein L22, bacterial/chloroplast-type
5893	0.532981	0.598299	0.788245	1	25.1667	32.5	29.2	Root; GO:0008150 biological_process; GO:0006810 transport; IPR005893 Spermidine/putrescine ABC transporter, ATP-binding subunit
13033	0.531034	0.599382	0.788245	1	5	5.83333	4	Root; GO:0008150 biological_process; GO:0016043 cellular component organization; IPR013033 Septum formation inhibitor MinC
8220	0.530857	0.599481	0.788245	1	4.33333	5	3.6	Root; GO:0008150 biological_process; GO:0009058 biosynthetic process; IPR008220 Homoserine acetyltransferase
6415	0.528909	0.600568	0.788245	1	7	9	12.2	Root; GO:0008150 biological_process; GO:0006810 transport; GO:0006811 ion transport; IPR006415 P-type ATPase, subfamily IIIB
1719	0.526155	0.602108	0.788757	1	49.3333	53.6667	55	Root; GO:0008150 biological_process; GO:0006259 DNA metabolic process; IPR001719 AP endonuclease 2
5880	0.525355	0.602556	0.788757	1	60	63	68.2	Root; GO:0008150 biological_process; GO:0006412 translation; IPR002171 Ribosomal protein L2; IPR005880 Ribosomal protein L2, bacterial/organellar-type
4785	0.5172	0.607147	0.793245	1	28.1667	28.5	25.4	Root; GO:0008150 biological_process; GO:0005975 carbohydrate metabolic process; IPR003500 Sugar-phosphate isomerase, RpiB/LacA/LacB family; IPR004785 Ribose 5-phosphate isomerase B
1114	0.516413	0.607592	0.793245	1	66.6667	66.3333	62.8	Root; GO:0008150 biological_process; GO:0009058 biosynthetic process; IPR001114 Adenylosuccinate synthetase
807	0.51284	0.609617	0.794309	1	14.8333	13.8333	11.6	Root; GO:0008150 biological_process; GO:0009058 biosynthetic process; IPR000807 Imidazoleglycerol-phosphate dehydratase
12394	0.510571	0.610908	0.794309	1	31.3333	32.8333	35.8	Root; GO:0008150 biological_process; GO:0055114 oxidation-reduction process; IPR012394 Aldehyde dehydrogenase NAD(P)-dependent
4417	0.510399	0.611006	0.794309	1	37.1667	42.3333	39.2	Root; GO:0008150 biological_process; GO:0016070 RNA metabolic process; IPR002218 Glucose-inhibited division protein A-related; IPR004417 Folate-dependent ribothymidyl synthase
22973	0.509311	0.611626	0.794309	1	29.5	33.5	31.4	Root; GO:0008150 biological_process; Other; IPR001790 Ribosomal protein L10P; IPR022973 Ribosomal protein L10
23546	0.493453	0.620744	0.804424	1	11	12.1667	10.4	Root; GO:0008150 biological_process; GO:0006259 DNA metabolic process; IPR023546 Methylated-DNA--protein-cysteine methyltransferase
13452	0.492934	0.621045	0.804424	1	24.1667	23.8333	20.2	Root; GO:0008150 biological_process; GO:0005975 carbohydrate metabolic process; IPR001998 Xylose isomerase; IPR013452 Xylose isomerase, bacterial-type
5949	0.491237	0.622031	0.804645	1	51.1667	45.8333	40	Root; GO:0008150 biological_process; GO:0005975 carbohydrate metabolic process; IPR005949 Formate acetyltransferase
10190	0.488571	0.623582	0.805232	1	22.5	19.5	17.4	Root; GO:0008150 biological_process; GO:0009058 biosynthetic process; IPR010190 Diaminopimelate dehydrogenase, Ddh
5290	0.480692	0.628194	0.809435	1	17.6667	16.6667	18.4	Root; GO:0008150 biological_process; GO:0006412 translation; IPR000589 Ribosomal protein S15; IPR005290 Ribosomal protein S15, bacterial-type
11697	0.478766	0.629327	0.809838	1	17.6667	17.8333	20.2	Root; GO:0008150 biological_process; GO:0006520 cellular amino acid metabolic process; IPR011697 Peptidase C26
2864	0.475896	0.631021	0.81096	1	11.8333	9.16667	10.8	Root; GO:0008150 biological_process; GO:0009058 biosynthetic process; IPR002864 Acyl-ACP thioesterase
11995	0.473493	0.632442	0.811205	1	24.8333	27.3333	28.2	Root; GO:0008150 biological_process; GO:0009058 biosynthetic process; IPR011995 Orotidine 5'-phosphate decarboxylase, type 2
343	0.472797	0.632855	0.811205	1	14.3333	10.6667	11.2	Root; GO:0008150 biological_process; GO:0009058 biosynthetic process; IPR000343 Tetrapyrrole biosynthesis, glutamyl-tRNA reductase
12693	0.466702	0.63648	0.814402	1	9.66667	10.8333	8.6	Root; GO:0008150 biological_process; GO:0006810 transport; IPR012693 ABC transporter, phosphonate import, PhnC
1564	0.465832	0.636999	0.814402	1	15.5	12.8333	15.6	Root; GO:0008150 biological_process; GO:0009058 biosynthetic process; IPR001564 Nucleoside diphosphate kinase
25502	0.462011	0.639286	0.816268	1	31.3333	35.5	33.2	Root; GO:0008150 biological_process; GO:0019538 protein metabolic process; IPR002510 Metalloprotease TldD/PmbA; IPR025502 TldD
22390	0.459395	0.640857	0.817216	1	6	6.16667	8	Root; GO:0008150 biological_process; GO:0009058 biosynthetic process; IPR002830 UbiD decarboxylyase family; IPR022390 Menaquinone biosynthesis decarboxylase, SCO4490
93	0.456547	0.642572	0.818325	1	44.1667	46.5	48.2	Root; GO:0008150 biological_process; GO:0006259 DNA metabolic process; IPR000093 DNA recombination protein RecR
23454	0.453383	0.644484	0.818325	1	5.5	4.33333	4	Root; GO:0008150 biological_process; GO:0006412 translation; IPR001865 Ribosomal protein S2; IPR005707 Ribosomal protein S2, eukaryotic/archaeal; IPR023454 Ribosomal protein S2, archaeal
10206	0.453337	0.644512	0.818325	1	4.33333	3.66667	4.8	Root; GO:0008150 biological_process; GO:0016070 RNA metabolic process; IPR010206 Poly(A) polymerase I
6009	0.452112	0.645254	0.818325	1	43.8333	43.5	47	Root; GO:0008150 biological_process; GO:0009058 biosynthetic process; IPR006009 N-acetylglucosaminyltransferase, MurG
397	0.450292	0.646358	0.818325	1	21.5	19.8333	17.6	Root; GO:0008150 biological_process; Other; IPR000397 Heat shock protein Hsp33
3136	0.449728	0.646701	0.818325	1	30	30.3333	32.8	Root; GO:0008150 biological_process; GO:0006807 nitrogen compound metabolic process; IPR003136 Cytidylate kinase
821	0.447075	0.648315	0.819318	1	56.6667	58.8333	60.6	Root; GO:0008150 biological_process; GO:0006520 cellular amino acid metabolic process; IPR000821 Alanine racemase
6472	0.44334	0.650596	0.821148	1	17.8333	21	18	Root; GO:0008150 biological_process; GO:0051186 cofactor metabolic process; IPR006472 Citrate lyase, alpha subunit
3669	0.441495	0.651726	0.821524	1	21	24	24	Root; GO:0008150 biological_process; GO:0009058 biosynthetic process; IPR003669 Thymidylate synthase ThyX
5255	0.436621	0.654721	0.823309	1	27.5	24	25.2	Root; GO:0008150 biological_process; GO:0009058 biosynthetic process; IPR005255 4-hydroxythreonine-4-phosphate dehydrogenase PdxA
1857	0.436477	0.65481	0.823309	1	21	22.6667	24.4	Root; GO:0008150 biological_process; GO:0006412 translation; IPR001857 Ribosomal protein L19
11867	0.430341	0.658605	0.827027	1	10	10.1667	8.4	Root; GO:0008150 biological_process; GO:0006810 transport; GO:0006811 ion transport; IPR011867 Molybdate ABC transporter, permease protein
13438	0.426653	0.660898	0.828852	1	7	7.83333	6.4	Root; GO:0008150 biological_process; GO:0051301 cell division; IPR001182 Cell cycle protein FtsW/RodA; IPR013437 Cell division protein FtsW; IPR013438 Sporulation stage V, protein E
711	0.420221	0.664919	0.832836	1	7.83333	8.83333	9.4	Root; GO:0008150 biological_process; GO:0009058 biosynthetic process; IPR000711 ATPase, OSCP/delta subunit
24932	0.415748	0.667731	0.835299	1	44.1667	47.1667	45.6	Root; GO:0008150 biological_process; GO:0019538 protein metabolic process; IPR024932 Flavin transferase ApbE
4794	0.410884	0.670805	0.836677	1	19.3333	20.3333	16	Root; GO:0008150 biological_process; GO:0009058 biosynthetic process; IPR004794 Riboflavin biosynthesis protein RibD
6812	0.410555	0.671013	0.836677	1	7.33333	6	5.8	Root; GO:0008150 biological_process; GO:0055114 oxidation-reduction process; IPR006812 Glycine reductase complex selenoprotein A
2381	0.409983	0.671376	0.836677	1	7.83333	8.16667	6.8	Root; GO:0008150 biological_process; GO:0016070 RNA metabolic process; IPR002381 Ribonuclease phosphorolytic, bacterial-type
13449	0.407455	0.672982	0.837244	1	6.83333	5.16667	5.6	Root; GO:0008150 biological_process; GO:0005975 carbohydrate metabolic process; IPR013449 Rhamnulokinase
5777	0.406597	0.673528	0.837244	1	10.6667	14.1667	13.8	Root; GO:0008150 biological_process; Other; IPR004165 Coenzyme A transferase family I; IPR005777 Acetyl-S-ACP:malonate ACP transferase
2320	0.403326	0.675613	0.838716	1	156.667	160.667	156	Root; GO:0008150 biological_process; GO:0006520 cellular amino acid metabolic process; IPR002320 Threonine-tRNA ligase, class IIa
5215	0.401475	0.676797	0.838716	1	52	54.5	50.8	Root; GO:0008150 biological_process; GO:0006810 transport; IPR005215 Trigger factor
11833	0.40075	0.677261	0.838716	1	103.167	103.833	95.8	Root; GO:0008150 biological_process; GO:0005975 carbohydrate metabolic process; IPR000811 Glycosyl transferase, family 35; IPR011833 Glycogen/starch/alpha-glucan phosphorylase
17568	0.396279	0.680132	0.841181	1	65.3333	65.6667	59.8	Root; GO:0008150 biological_process; GO:0009058 biosynthetic process; IPR017568 3-oxoacyl-[acyl-carrier-protein] synthase 2
27491	0.394063	0.68156	0.841181	1	13	12.1667	14	Root; GO:0008150 biological_process; GO:0006412 translation; IPR002150 Ribosomal protein L31; IPR027491 Ribosomal protein L31 type A
6136	0.393678	0.681808	0.841181	1	11.1667	10.1667	9	Root; GO:0008150 biological_process; GO:0006810 transport; GO:0009306 protein secretion; IPR006135 Type III secretion system substrate exporter; IPR006136 Type III exporter system, flagellar biosynthetic protein FlhB
11878	0.390133	0.684101	0.84254	1	14.3333	18.3333	17.8	Root; GO:0008150 biological_process; GO:0006520 cellular amino acid metabolic process; IPR006034 Asparaginase/glutaminase; IPR006033 L-asparaginase, type I; IPR011878 Glutamyl-tRNA(Gln) amidotransferase subunit D
9366	0.389259	0.684668	0.84254	1	5.33333	4.33333	4.4	Root; GO:0008150 biological_process; Other; IPR009366 Protein Veg
13538	0.384607	0.687693	0.843331	1	3.66667	3.83333	5.6	Root; GO:0008150 biological_process; GO:0006950 response to stress; IPR013538 Activator of Hsp90 ATPase homologue 1-like
14362	0.384407	0.687823	0.843331	1	87	90.1667	92.4	Root; GO:0008150 biological_process; GO:0006520 cellular amino acid metabolic process; IPR006095 Glutamate/phenylalanine/leucine/valine dehydrogenase; IPR014362 Glutamate dehydrogenase
16267	0.382789	0.688879	0.843531	1	12.1667	15.6667	15.8	Root; GO:0008150 biological_process; Other; IPR002618 UTP--glucose-1-phosphate uridylyltransferase family; IPR016267 UTP--glucose-1-phosphate uridylyltransferase
6395	0.38154	0.689696	0.843531	1	18.3333	19.8333	21.4	Root; GO:0008150 biological_process; Other; IPR001354 Mandelate racemase/muconate lactonizing enzyme/methylaspartate ammonia-lyase; IPR006395 Methylaspartate ammonia-lyase
5704	0.376448	0.693035	0.845862	1	51	50.3333	54.2	Root; GO:0008150 biological_process; GO:0006412 translation; IPR005704 Ribosomal protein S3, bacterial
4498	0.376022	0.693316	0.845862	1	21.3333	19	20.2	Root; GO:0008150 biological_process; GO:0019538 protein metabolic process; IPR004498 Ribosomal protein L11 methyltransferase
30283	0.374426	0.694367	0.846099	1	3.83333	3.83333	3.2	Root; GO:0008150 biological_process; GO:0006810 transport; IPR030283 Molybdate/tungstate import ATP-binding protein WtpC
1288	0.363318	0.701732	0.853263	1	30	33.3333	33.4	Root; GO:0008150 biological_process; Other; IPR001288 Translation initiation factor 3
19971	0.362021	0.702598	0.853263	1	2.66667	2.5	2	Root; GO:0008150 biological_process; GO:0006412 translation; IPR000218 Ribosomal protein L14b/L23e; IPR019971 Ribosomal protein L14P, archaeal
5001	0.361659	0.70284	0.853263	1	3.16667	2.66667	2.6	Root; GO:0008150 biological_process; Other; IPR005001 RNA-binding protein Hfq
5661	0.35343	0.708364	0.858033	1	86.8333	86.3333	92.6	Root; GO:0008150 biological_process; GO:0006810 transport; GO:0006811 ion transport; IPR005661 Na+-transporting methylmalonyl-CoA/oxaloacetate decarboxylase, beta subunit
740	0.353217	0.708508	0.858033	1	27.6667	26.1667	28.2	Root; GO:0008150 biological_process; Other; IPR000740 GrpE nucleotide exchange factor
4793	0.349625	0.710935	0.859509	1	8.33333	8.83333	7	Root; GO:0008150 biological_process; Other; IPR004793 Desulfoferrodoxin
1705	0.347085	0.712658	0.859509	1	12	11	12.8	Root; GO:0008150 biological_process; GO:0006412 translation; IPR001705 Ribosomal protein L33
6464	0.345743	0.713569	0.859509	1	18.5	17	16	Root; GO:0008150 biological_process; GO:0019538 protein metabolic process; IPR006464 Ribosomal-protein-alanine acetyltransferase
13455	0.345573	0.713685	0.859509	1	9	11	11.4	Root; GO:0008150 biological_process; GO:0006810 transport; IPR013455 ABC transporter, D-xylose, ATP-binding protein
766	0.344992	0.71408	0.859509	1	8.5	10	8.4	Root; GO:0008150 biological_process; GO:0005975 carbohydrate metabolic process; IPR000766 Galactose-1-phosphate uridyl transferase, class II
1902	0.337	0.719543	0.865029	1	27.8333	23.8333	21	Root; GO:0008150 biological_process; GO:0006810 transport; GO:0006811 ion transport; IPR001902 SLC26A/SulP transporter
17551	0.330092	0.724303	0.869692	1	2.83333	2.5	2	Root; GO:0008150 biological_process; GO:0016310 phosphorylation; IPR002736 Triphosphoribosyl-dephospho-CoA protein; IPR017551 Triphosphoribosyl-dephospho-CoA synthase CitG
10096	0.32213	0.729834	0.875269	1	8.33333	7.66667	6.2	Root; GO:0008150 biological_process; GO:0022900 electron transport chain; IPR010096 NAD(P)H-quinone oxidoreductase, subunit N/subunit 2
16381	0.317655	0.732964	0.877956	1	5.16667	6	4.8	Root; GO:0008150 biological_process; GO:0007165 signal transduction; GO:0000160 phosphorelay signal transduction system; IPR016381 Signal transduction histidine kinase, DegS
24109	0.314238	0.735364	0.879763	1	44.3333	45.8333	49.4	Root; GO:0008150 biological_process; GO:0006520 cellular amino acid metabolic process; IPR002305 Aminoacyl-tRNA synthetase, class Ic; IPR002306 Tryptophan-tRNA ligase; IPR024109 Tryptophan-tRNA ligase, bacterial-type
4733	0.311178	0.737522	0.880903	1	37	39.3333	39.6	Root; GO:0008150 biological_process; GO:0009058 biosynthetic process; IPR004733 Phosphoribosylformylglycinamidine cyclo-ligase
14310	0.309075	0.739008	0.880903	1	2.5	2.66667	2.2	Root; GO:0008150 biological_process; GO:0007165 signal transduction; GO:0000160 phosphorelay signal transduction system; IPR014310 Signal transduction histidine kinase, phosphate regulon sensor PhoR
12116	0.305112	0.74182	0.880903	1	11.3333	9.16667	10	Root; GO:0008150 biological_process; GO:0009058 biosynthetic process; IPR003664 Fatty acid synthesis PlsX protein; IPR012116 Glycine/sarcosine/betaine reductase complex, protein C, alpha subunit
5133	0.305062	0.741855	0.880903	1	2	1.83333	1.6	Root; GO:0008150 biological_process; GO:0006810 transport; GO:0006811 ion transport; IPR005133 Na+/H+ antiporter subunit G
4809	0.303862	0.742708	0.880903	1	45	46.5	39.6	Root; GO:0008150 biological_process; GO:0006807 nitrogen compound metabolic process; GO:0071941 nitrogen cycle metabolic process; IPR004809 Glutamine synthetase type I
14241	0.302879	0.743409	0.880903	1	3.33333	3.33333	4.8	Root; GO:0008150 biological_process; GO:0045333 cellular respiration; IPR000883 Cytochrome c oxidase subunit I; IPR014241 Cytochrome c oxidase, subunit I bacterial type
4722	0.301665	0.744274	0.880903	1	58	60.8333	60.4	Root; GO:0008150 biological_process; GO:0009058 biosynthetic process; IPR004722 Dihydroorotase
9165	0.300472	0.745126	0.880903	1	12.3333	11.6667	10.2	Root; GO:0008150 biological_process; GO:0009058 biosynthetic process; IPR003826 S-adenosylmethionine decarboxylase family, prokaryotic; IPR009165 S-adenosylmethionine decarboxylase, bacterial
1854	0.30031	0.745242	0.880903	1	10.1667	10.5	11	Root; GO:0008150 biological_process; GO:0006412 translation; IPR001854 Ribosomal protein L29
23068	0.295775	0.748491	0.883685	1	6.5	5.5	6	Root; GO:0008150 biological_process; GO:0016070 RNA metabolic process; IPR023068 CCA-adding enzyme, firmicutes
23585	0.2928	0.75063	0.884489	1	46	51.3333	53.2	Root; GO:0008150 biological_process; GO:0006520 cellular amino acid metabolic process; IPR002301 Isoleucine-tRNA ligase; IPR023585 Isoleucine-tRNA ligase, type 1
271	0.292337	0.750964	0.884489	1	8.33333	8	9.4	Root; GO:0008150 biological_process; GO:0006412 translation; IPR000271 Ribosomal protein L34
28619	0.289003	0.753372	0.886267	1	2.83333	2.16667	3	Root; GO:0008150 biological_process; GO:0016043 cellular component organization; IPR028619 ATP-dependent RNA helicase DbpA
5780	0.287347	0.754571	0.886621	1	5.66667	5.16667	4.8	Root; GO:0008150 biological_process; GO:0006810 transport; GO:0006811 ion transport; IPR005780 Tetrahydromethanopterin S-methyltransferase, subunit E
11303	0.28535	0.75602	0.887267	1	44.5	46.8333	48.4	Root; GO:0008150 biological_process; GO:0006810 transport; IPR004338 NADH-quinone reductase NQR2/RnfD; IPR011303 Electron transport complex, subunit RnfD/RsxD
5252	0.283009	0.757723	0.88821	1	44	42	41	Root; GO:0008150 biological_process; GO:0009058 biosynthetic process; IPR005252 Coenzyme A biosynthesis bifunctional protein CoaBC
887	0.278662	0.760896	0.890521	1	19.8333	20	18.4	Root; GO:0008150 biological_process; Other; IPR000887 KDPG/KHG aldolase
1952	0.277839	0.761499	0.890521	1	31.5	33.6667	35.6	Root; GO:0008150 biological_process; Other; IPR001952 Alkaline phosphatase
11953	0.27442	0.764008	0.890922	1	19.6667	16.1667	16	Root; GO:0008150 biological_process; GO:0009058 biosynthetic process; IPR003672 CobN/magnesium chelatase; IPR011953 Cobaltochelatase, CobN subunit
25650	0.27427	0.764118	0.890922	1	15.8333	18.1667	17.2	Root; GO:0008150 biological_process; GO:0009058 biosynthetic process; IPR025650 Alkyldihydroxyacetonephosphate synthase
3825	0.272252	0.765604	0.890922	1	5.83333	5.33333	4.8	Root; GO:0008150 biological_process; GO:0009058 biosynthetic process; IPR003825 Colicin V production, CvpA
8567	0.272128	0.765695	0.890922	1	23.5	26.1667	26	Root; GO:0008150 biological_process; GO:0009056 catabolic process; IPR008567 3-keto-5-aminohexanoate cleavage enzyme
2176	0.270037	0.767238	0.890922	1	26.5	27	24.4	Root; GO:0008150 biological_process; GO:0006259 DNA metabolic process; IPR002176 Crossover junction endodeoxyribonuclease RuvC
14216	0.27001	0.767258	0.890922	1	3.33333	3.33333	4	Root; GO:0008150 biological_process; GO:0006810 transport; GO:0006811 ion transport; IPR014216 ABC transporter, CydDC cysteine exporter (CydDC-E) family, permease/ATP-binding protein CydD
5914	0.268145	0.768637	0.891355	1	11.8333	11.5	14	Root; GO:0008150 biological_process; GO:0006629 lipid metabolic process; IPR005914 Acetoacetyl-CoA synthase
5813	0.267064	0.769437	0.891355	1	23.1667	22.8333	21.2	Root; GO:0008150 biological_process; GO:0006412 translation; IPR005813 Ribosomal protein L20
1204	0.265303	0.770744	0.891632	1	53.3333	50.3333	54.4	Root; GO:0008150 biological_process; GO:0006810 transport; GO:0006811 ion transport; IPR001204 Phosphate transporter
10162	0.264309	0.771483	0.891632	1	17.6667	18.8333	16.2	Root; GO:0008150 biological_process; Other; IPR002933 Peptidase M20; IPR010162 Peptidase M20B, peptidase T
15278	0.26023	0.774522	0.894046	1	4.66667	4.33333	3.6	Root; GO:0008150 biological_process; GO:0006259 DNA metabolic process; IPR015278 Type-2 restriction enzyme BglII
4740	0.259076	0.775384	0.894046	1	10	9.33333	11.4	Root; GO:0008150 biological_process; GO:0006810 transport; IPR004740 Nucleoside:H+ symporter
23031	0.25674	0.777133	0.8946	1	25.8333	27.1667	28.8	Root; GO:0008150 biological_process; GO:0009058 biosynthetic process; IPR023031 Orotate phosphoribosyltransferase
23053	0.254545	0.77878	0.8946	1	12.3333	13.6667	13	Root; GO:0008150 biological_process; GO:0006412 translation; IPR001209 Ribosomal protein S14; IPR023053 Ribosomal protein S14, type Z
10182	0.253991	0.779197	0.8946	1	13.1667	14.8333	14	Root; GO:0008150 biological_process; Other; IPR002933 Peptidase M20; IPR010182 N-formyl-4-amino-5-aminomethyl-2-methylpyrimidine deformylase/Succinyl-diaminopimelate desuccinylase
6352	0.253602	0.779489	0.8946	1	39.5	43.6667	40.4	Root; GO:0008150 biological_process; GO:0005975 carbohydrate metabolic process; IPR005841 Alpha-D-phosphohexomutase superfamily; IPR006352 Phosphoglucosamine mutase, bacterial type
22999	0.249031	0.782936	0.897512	1	8.33333	7	8.2	Root; GO:0008150 biological_process; GO:0005975 carbohydrate metabolic process; IPR001585 Transaldolase; IPR004731 Transaldolase 3A/3B; IPR022999 Transaldolase 3B, putative
5864	0.241622	0.788561	0.902912	1	7.16667	9	8	Root; GO:0008150 biological_process; GO:0009058 biosynthetic process; IPR002146 ATPase, F0 complex, subunit B/B', bacterial/chloroplast; IPR005864 ATPase, F0 complex, subunit B, bacterial
2036	0.237977	0.791345	0.903381	1	16.3333	16.8333	17.6	Root; GO:0008150 biological_process; GO:0016070 RNA metabolic process; IPR002036 Endoribonuclease YbeY
3231	0.237514	0.7917	0.903381	1	21.6667	20.1667	20.6	Root; GO:0008150 biological_process; GO:0009058 biosynthetic process; IPR003231 Acyl carrier protein (ACP)
7859	0.237491	0.791717	0.903381	1	2.66667	2.16667	2	Root; GO:0008150 biological_process; GO:0055114 oxidation-reduction process; IPR007859 Electron transfer flavoprotein-ubiquinone oxidoreductase
15510	0.233281	0.794948	0.903791	1	3.5	3.83333	3.4	Root; GO:0008150 biological_process; GO:0009056 catabolic process; IPR015510 Peptidoglycan recognition protein
5248	0.23327	0.794957	0.903791	1	25.1667	23.5	24.8	Root; GO:0008150 biological_process; GO:0009058 biosynthetic process; IPR005248 Probable nicotinate-nucleotide adenylyltransferase
1282	0.230143	0.797367	0.903791	1	16.8333	16.5	15	Root; GO:0008150 biological_process; GO:0005975 carbohydrate metabolic process; IPR001282 Glucose-6-phosphate dehydrogenase
4488	0.228808	0.798398	0.903791	1	18.5	20.5	19.4	Root; GO:0008150 biological_process; GO:0006810 transport; GO:0006811 ion transport; IPR002523 Mg2+ transporter protein, CorA-like/Zinc transport protein ZntB; IPR004488 Magnesium/cobalt transport protein CorA
1816	0.227815	0.799166	0.903791	1	46.8333	47.1667	49.8	Root; GO:0008150 biological_process; GO:0009058 biosynthetic process; IPR001816 Translation elongation factor EFTs/EF1B
22896	0.227054	0.799755	0.903791	1	54.6667	58.3333	56	Root; GO:0008150 biological_process; Other; IPR000652 Triosephosphate isomerase; IPR022896 Triosephosphate isomerase, bacterial/eukaryotic
16305	0.226035	0.800545	0.903791	1	9	10.3333	8.4	Root; GO:0008150 biological_process; GO:0005975 carbohydrate metabolic process; IPR001250 Mannose-6-phosphate isomerase, type I; IPR016305 Mannose-6-phosphate isomerase
17721	0.224813	0.801493	0.903791	1	102.5	105	109.6	Root; GO:0008150 biological_process; GO:0055114 oxidation-reduction process; IPR017721 Indolepyruvate ferredoxin oxidoreductase, alpha subunit
4655	0.224637	0.80163	0.903791	1	39	42.3333	40.4	Root; GO:0008150 biological_process; GO:0009058 biosynthetic process; IPR004655 3-oxoacyl-[acyl-carrier-protein] synthase 3
2904	0.223352	0.802629	0.903791	1	12.1667	12.6667	10.4	Root; GO:0008150 biological_process; GO:0006520 cellular amino acid metabolic process; IPR002904 Lysine-tRNA ligase
3796	0.223301	0.802668	0.903791	1	14	12.3333	14.6	Root; GO:0008150 biological_process; Other; IPR003796 Ribonucleotide reductase regulator NrdR-like
23042	0.215977	0.808389	0.908747	1	20.5	23.3333	21.6	Root; GO:0008150 biological_process; GO:0019538 protein metabolic process; IPR011356 Leucine aminopeptidase/peptidase B; IPR023042 Peptidase M17, leucine aminopeptidase
15963	0.214228	0.809762	0.909254	1	40.3333	41.6667	43.6	Root; GO:0008150 biological_process; GO:0009058 biosynthetic process; IPR011817 Uridylate kinase; IPR015963 Uridylate kinase, bacteria
14224	0.212096	0.811439	0.910103	1	15	14.1667	12.4	Root; GO:0008150 biological_process; Other; IPR014224 Spore cortex-lytic enzyme SleB
22926	0.207742	0.814876	0.91292	1	15.3333	15.5	13.8	Root; GO:0008150 biological_process; GO:0009058 biosynthetic process; IPR003694 NAD(+) synthetase; IPR022926 NH(3)-dependent NAD(+) synthetase
19980	0.205754	0.816451	0.913647	1	26.1667	28.1667	28.2	Root; GO:0008150 biological_process; GO:0006412 translation; IPR001892 Ribosomal protein S13; IPR019980 Ribosomal protein S13, bacterial-type
8822	0.196294	0.823994	0.921044	1	4.33333	3.83333	4.4	Root; GO:0008150 biological_process; GO:0006259 DNA metabolic process; IPR008822 Crossover junction endodeoxyribonuclease, RusA-like
2649	0.190218	0.828881	0.924413	1	48.1667	50	51.8	Root; GO:0008150 biological_process; GO:0016070 RNA metabolic process; IPR002649 tRNA (guanine-N1-)-methyltransferase, bacteria
1312	0.188643	0.830152	0.924786	1	5.33333	4.33333	4.8	Root; GO:0008150 biological_process; GO:0005975 carbohydrate metabolic process; IPR001312 Hexokinase
5527	0.18507	0.833047	0.926964	1	2.83333	2.83333	3.4	Root; GO:0008150 biological_process; GO:0051301 cell division; IPR005527 Septum formation topological specificity factor MinE
1278	0.182272	0.835321	0.928447	1	112.5	110.333	113.4	Root; GO:0008150 biological_process; GO:0006520 cellular amino acid metabolic process; IPR001278 Arginine-tRNA ligase
30963	0.179316	0.837732	0.929768	1	28	26.8333	27.6	Root; GO:0008150 biological_process; GO:0009058 biosynthetic process; IPR030963 3-dehydroquinate synthase family
16211	0.177946	0.838851	0.929768	1	6.16667	5.66667	5	Root; GO:0008150 biological_process; GO:0006520 cellular amino acid metabolic process; IPR006095 Glutamate/phenylalanine/leucine/valine dehydrogenase; IPR016211 Glutamate/phenylalanine/leucine/valine dehydrogenase, bacterial/archaeal
20931	0.177356	0.839334	0.929768	1	5	6.16667	5.2	Root; GO:0008150 biological_process; GO:0044281 small molecule metabolic process; IPR002129 Pyridoxal phosphate-dependent decarboxylase; IPR020931 Tyrosine decarboxylase
1653	0.174263	0.84187	0.930523	1	21.1667	20.5	22.4	Root; GO:0008150 biological_process; GO:0009058 biosynthetic process; IPR001653 Diaminopimelate epimerase, DapF
11289	0.172151	0.843607	0.930523	1	52	52.8333	49.2	Root; GO:0008150 biological_process; GO:0005975 carbohydrate metabolic process; IPR000771 Ketose-bisphosphate aldolase, class-II; IPR011289 Fructose-1,6-bisphosphate aldolase, class 2
23458	0.171984	0.843745	0.930523	1	103.167	105.167	97.6	Root; GO:0008150 biological_process; GO:0006520 cellular amino acid metabolic process; IPR015413 Methionyl/Leucyl tRNA synthetase; IPR014758 Methionyl-tRNA synthetase; IPR023458 Methionine-tRNA ligase, type 1
23455	0.171933	0.843787	0.930523	1	12	11.1667	10.4	Root; GO:0008150 biological_process; GO:0009058 biosynthetic process; IPR012165 Cytochrome-c3 hydrogenase, gamma subunit; IPR023455 Dihydroorotate dehydrogenase electron transfer subunit
989	0.168546	0.846581	0.931508	1	5.16667	5.33333	4.4	Root; GO:0008150 biological_process; GO:0009058 biosynthetic process; IPR000989 Replication protein
22995	0.167421	0.847512	0.931508	1	3.5	3.83333	4	Root; GO:0008150 biological_process; GO:0009058 biosynthetic process; IPR022995 Probable 2-phosphosulpholactate phosphatase
2295	0.165013	0.849508	0.932663	1	109.833	115.833	110.8	Root; GO:0008150 biological_process; GO:0006259 DNA metabolic process; IPR002295 N6 adenine-specific DNA methyltransferase, D21 class
10209	0.162523	0.851577	0.933896	1	18.8333	17.8333	17.2	Root; GO:0008150 biological_process; GO:0022900 electron transport chain; IPR010209 Electron transport complex, subunit RnfG/RsxG
23049	0.158663	0.854797	0.936247	1	33.8333	35.6667	35.6	Root; GO:0008150 biological_process; GO:0009058 biosynthetic process; IPR011831 Glucose-1-phosphate adenylyltransferase; IPR023049 Glucose-1-phosphate adenylyltransferase GlgC, bacterial
3190	0.157681	0.855618	0.936247	1	10.5	10.6667	11.8	Root; GO:0008150 biological_process; GO:0009058 biosynthetic process; IPR003190 Aspartate decarboxylase
30165	0.154038	0.858673	0.937881	1	68.3333	73.5	70.2	Root; GO:0008150 biological_process; GO:0006810 transport; GO:0006811 ion transport; IPR030165 sn-glycerol-3-phosphate transport system permease protein UgpE
5750	0.151212	0.861051	0.937881	1	97.5	99.1667	94.4	Root; GO:0008150 biological_process; GO:0009058 biosynthetic process; IPR005750 UDP-N-acetylglucosamine 1-carboxyvinyltransferase
4796	0.149193	0.862755	0.937881	1	5.66667	5.5	4.6	Root; GO:0008150 biological_process; GO:0006810 transport; IPR004796 Phosphotransferase system, cellobiose-type IIC component
6385	0.148936	0.862971	0.937881	1	3.33333	2.66667	3	Root; GO:0008150 biological_process; Other; IPR006383 HAD-superfamily hydrolase, subfamily IB, PSPase-like; IPR006385 HAD-superfamily hydrolase, subfamily IB, PSPase-like, bacterial
5789	0.14806	0.863712	0.937881	1	9.5	8.33333	9.4	Root; GO:0008150 biological_process; GO:0009056 catabolic process; IPR005789 Threonine dehydratase, catabolic
13355	0.14777	0.863957	0.937881	1	2.33333	3	2.8	Root; GO:0008150 biological_process; GO:0006810 transport; GO:0009306 protein secretion; IPR004846 Type II/III secretion system; IPR001775 GspD/PilQ family; IPR013355 Type IV pilus secretin PilQ
10075	0.14764	0.864067	0.937881	1	16	14.5	14	Root; GO:0008150 biological_process; GO:0009058 biosynthetic process; IPR010075 Phosphoribosylformylglycinamidine synthase subunit PurQ
30802	0.146877	0.864713	0.937881	1	22.6667	21.3333	23.4	Root; GO:0008150 biological_process; GO:0006810 transport; IPR030802 ABC transporter permease MalE
1062	0.142102	0.868768	0.941245	1	40	38.3333	39	Root; GO:0008150 biological_process; Other; IPR001062 Transcription antitermination protein, NusG
23012	0.137897	0.872357	0.944097	1	56.3333	58.3333	60.2	Root; GO:0008150 biological_process; GO:0009056 catabolic process; IPR020581 Glycine cleavage system P protein; IPR023012 Probable glycine dehydrogenase (decarboxylating) subunit 2
2514	0.136225	0.873789	0.944611	1	112.667	118.667	109.4	Root; GO:0008150 biological_process; GO:0006259 DNA metabolic process; IPR002514 Transposase IS3/IS911family
23717	0.132913	0.876633	0.946649	1	42.8333	45.8333	44.8	Root; GO:0008150 biological_process; GO:0006520 cellular amino acid metabolic process; IPR002316 Proline-tRNA ligase, class IIa; IPR004500 Prolyl-tRNA synthetase, class IIa, bacterial-type; IPR023717 Prolyl-tRNA synthetase, class IIa, type 1
22944	0.13034	0.87885	0.948006	1	4.16667	4.16667	3.6	Root; GO:0008150 biological_process; GO:0006810 transport; GO:0006811 ion transport; IPR008218 ATPase, V1 complex, subunit F; IPR022944 ATPase, V1 complex, subunit F, bacterial/archaeal
4570	0.127742	0.881095	0.948373	1	25.1667	23.6667	24.2	Root; GO:0008150 biological_process; GO:0009058 biosynthetic process; IPR000462 CDP-alcohol phosphatidyltransferase; IPR004570 CDP-diacylglycerol--glycerol-3-phosphate 3-phosphatidyltransferase
1404	0.127282	0.881492	0.948373	1	79.1667	75.8333	81.2	Root; GO:0008150 biological_process; GO:0006950 response to stress; IPR001404 Heat shock protein Hsp90 family
10232	0.12356	0.884722	0.950043	1	4.16667	3.83333	3.4	Root; GO:0008150 biological_process; GO:0009058 biosynthetic process; IPR010232 Probable protein kinase UbiB
5761	0.122606	0.885552	0.950043	1	75	72.1667	74.2	Root; GO:0008150 biological_process; GO:0051301 cell division; IPR005761 UDP-N-acetylmuramoylalanyl-D-glutamate-2,6-diaminopimelate ligase
453	0.121257	0.886726	0.95027	1	38.1667	40.1667	39.8	Root; GO:0008150 biological_process; GO:0009058 biosynthetic process; IPR000453 Chorismate synthase
10089	0.117086	0.89037	0.95314	1	5.83333	6.33333	5.4	Root; GO:0008150 biological_process; Other; IPR010089 Flavoprotein WrbA
1640	0.113231	0.893754	0.955126	1	43.1667	45.3333	44.6	Root; GO:0008150 biological_process; GO:0009058 biosynthetic process; IPR001640 Prolipoprotein diacylglyceryl transferase
4487	0.112768	0.894161	0.955126	1	75.1667	76.3333	73.4	Root; GO:0008150 biological_process; Other; IPR004487 Clp protease, ATP-binding subunit ClpX
10079	0.10968	0.896884	0.956999	1	3.83333	3.33333	3.2	Root; GO:0008150 biological_process; GO:0009058 biosynthetic process; IPR010079 Xanthine phosphoribosyltransferase
8631	0.108194	0.898196	0.957365	1	15.3333	15.6667	14.4	Root; GO:0008150 biological_process; GO:0009058 biosynthetic process; IPR008631 Glycogen synthase
17821	0.106473	0.89972	0.957955	1	9.66667	9.33333	8.6	Root; GO:0008150 biological_process; GO:0051186 cofactor metabolic process; IPR003702 Acetyl-CoA hydrolase/transferase; IPR017821 Succinate CoA transferase
4692	0.0965264	0.908585	0.964714	1	7.16667	6.66667	7	Root; GO:0008150 biological_process; GO:0006810 transport; GO:0009306 protein secretion; IPR004692 Preprotein translocase SecG subunit
6394	0.0962859	0.9088	0.964714	1	6.5	6.66667	7.2	Root; GO:0008150 biological_process; GO:0009056 catabolic process; IPR006394 Glutamate mutase sigma subunit
10131	0.0960623	0.909001	0.964714	1	3.83333	3.33333	3	Root; GO:0008150 biological_process; GO:0006810 transport; IPR003423 Outer membrane efflux protein; IPR010131 RND efflux system, outer membrane lipoprotein, NodT
4642	0.0941812	0.91069	0.965468	1	10	10.6667	11.2	Root; GO:0008150 biological_process; GO:0009058 biosynthetic process; IPR004642 Serine dehydratase, alpha subunit
3821	0.0886797	0.915649	0.969684	1	54.5	55	56.6	Root; GO:0008150 biological_process; GO:0009058 biosynthetic process; IPR003821 1-deoxy-D-xylulose 5-phosphate reductoisomerase
4546	0.0870689	0.917106	0.970186	1	75.6667	73.6667	72.8	Root; GO:0008150 biological_process; GO:0006259 DNA metabolic process; IPR004546 Restriction endonuclease, type I, HsdM
1133	0.0834378	0.920402	0.972631	1	4	3.83333	3.4	Root; GO:0008150 biological_process; GO:0022900 electron transport chain; IPR001133 NADH-ubiquinone oxidoreductase chain 4L/K
7757	0.082155	0.92157	0.972823	1	6.66667	6.33333	6.2	Root; GO:0008150 biological_process; GO:0006807 nitrogen compound metabolic process; IPR007757 MT-A70-like
1095	0.0785907	0.924823	0.975214	1	10.1667	9.5	10.6	Root; GO:0008150 biological_process; GO:0009058 biosynthetic process; IPR001095 Acetyl-CoA carboxylase, alpha subunit
10228	0.0766289	0.926619	0.975434	1	3.33333	3.66667	3.8	Root; GO:0008150 biological_process; GO:0055114 oxidation-reduction process; IPR010228 NADH:ubiquinone oxidoreductase, subunit G
1980	0.0753653	0.927778	0.975434	1	27.5	28.6667	28.8	Root; GO:0008150 biological_process; GO:0009058 biosynthetic process; IPR001980 Coenzyme A biosynthesis protein
27050	0.0739171	0.929109	0.975434	1	36.6667	36	37.6	Root; GO:0008150 biological_process; GO:0006259 DNA metabolic process; IPR027050 Nuclease SbcCD subunit C
21191	0.0722264	0.930665	0.975434	1	7.5	7.16667	8	Root; GO:0008150 biological_process; GO:0006259 DNA metabolic process; IPR021191 Restriction endonuclease, type II, DpmII
8089	0.0719293	0.930938	0.975434	1	124.167	128.5	128	Root; GO:0008150 biological_process; GO:0005975 carbohydrate metabolic process; IPR008089 Nucleotide sugar epimerase
4700	0.071904	0.930962	0.975434	1	11.5	10.5	10.8	Root; GO:0008150 biological_process; GO:0006810 transport; IPR004700 Phosphotransferase system, sorbose-specific IIC subunit
28343	0.0700876	0.932637	0.976154	1	4.33333	4.33333	5	Root; GO:0008150 biological_process; GO:0005975 carbohydrate metabolic process; IPR000146 Fructose-1,6-bisphosphatase class 1/Sedoheputulose-1,7-bisphosphatase; IPR028343 Fructose-1,6-bisphosphatase
1188	0.0647524	0.937578	0.980286	1	55.8333	54.8333	52.6	Root; GO:0008150 biological_process; GO:0006810 transport; IPR001188 Bacterial periplasmic spermidine/putrescine-binding protein
206	0.0570005	0.944812	0.98233	1	19	19.6667	19.8	Root; GO:0008150 biological_process; GO:0006412 translation; IPR000206 Ribosomal protein L7/L12
5904	0.0569576	0.944852	0.98233	1	40.5	42	41.6	Root; GO:0008150 biological_process; GO:0009058 biosynthetic process; IPR005904 Hypoxanthine phosphoribosyl transferase
4628	0.0567986	0.945001	0.98233	1	14.5	14	13.4	Root; GO:0008150 biological_process; GO:0005975 carbohydrate metabolic process; IPR004628 Mannonate dehydratase
4424	0.0566437	0.945146	0.98233	1	27.1667	27.1667	26	Root; GO:0008150 biological_process; GO:0009058 biosynthetic process; IPR004424 4-diphosphocytidyl-2C-methyl-D-erythritol kinase
3815	0.0554412	0.946274	0.98233	1	5.83333	5.5	5.2	Root; GO:0008150 biological_process; GO:0042592 homeostatic process; IPR003815 S-ribosylhomocysteinase (LuxS)
11862	0.0547832	0.946892	0.98233	1	21.3333	21	22.2	Root; GO:0008150 biological_process; GO:0006810 transport; IPR011862 Phosphate binding protein
3753	0.0530243	0.948546	0.98233	1	58.8333	58.5	60	Root; GO:0008150 biological_process; GO:0009056 catabolic process; IPR003753 Exonuclease VII, large subunit
10388	0.0529882	0.94858	0.98233	1	6.66667	6.16667	6.2	Root; GO:0008150 biological_process; GO:0009058 biosynthetic process; IPR010388 Anaerobic cobalt chelatase
5488	0.0518188	0.949682	0.98233	1	14	14.5	15	Root; GO:0008150 biological_process; GO:0009056 catabolic process; IPR005488 N-acetylmuramic acid 6-phosphate etherase MurQ
3376	0.0508923	0.950556	0.98233	1	2.16667	2	2	Root; GO:0008150 biological_process; GO:0019538 protein metabolic process; IPR003376 Peridinin-chlorophyll A binding protein
12838	0.0489077	0.952431	0.98233	1	13.5	14.3333	13.2	Root; GO:0008150 biological_process; GO:0055114 oxidation-reduction process; IPR012838 Pyruvate formate-lyase activating enzyme
4416	0.048069	0.953225	0.98233	1	118.833	120.5	118.2	Root; GO:0008150 biological_process; GO:0016070 RNA metabolic process; IPR002218 Glucose-inhibited division protein A-related; IPR004416 Glucose-inhibited division protein A
4670	0.0469427	0.954292	0.98233	1	5.33333	5	5.6	Root; GO:0008150 biological_process; GO:0042592 homeostatic process; IPR004670 Na+/H+ antiporter NhaA
941	0.0467629	0.954462	0.98233	1	107.333	108.667	109.4	Root; GO:0008150 biological_process; GO:0005975 carbohydrate metabolic process; IPR000941 Enolase
1294	0.0449099	0.956221	0.982794	1	2.66667	2.83333	2.6	Root; GO:0008150 biological_process; Other; IPR001294 Phytochrome
6082	0.0431836	0.957863	0.982794	1	4.33333	4.5	4	Root; GO:0008150 biological_process; GO:0005975 carbohydrate metabolic process; IPR006082 Phosphoribulokinase
13456	0.042331	0.958675	0.982794	1	3.83333	4.16667	3.8	Root; GO:0008150 biological_process; GO:0006810 transport; IPR013456 D-xylose ABC transporter, substrate-binding protein
5999	0.0402987	0.960614	0.982794	1	57	59	58.8	Root; GO:0008150 biological_process; GO:0005975 carbohydrate metabolic process; IPR000577 Carbohydrate kinase, FGGY; IPR005999 Glycerol kinase
6200	0.0399171	0.960978	0.982794	1	22.5	23	23.6	Root; GO:0008150 biological_process; Other; IPR006197 Peptidase S24, LexA-like; IPR006200 LexA repressor
876	0.0392241	0.961641	0.982794	1	4.83333	5	4.6	Root; GO:0008150 biological_process; GO:0006412 translation; IPR000876 Ribosomal protein S4e
30191	0.0384492	0.962382	0.982794	1	10.5	9.83333	9.8	Root; GO:0008150 biological_process; GO:0006810 transport; IPR001248 Purine-cytosine permease; IPR030191 Cytosine permease
11771	0.0379295	0.962879	0.982794	1	8.83333	9.5	9.4	Root; GO:0008150 biological_process; GO:0009058 biosynthetic process; IPR003672 CobN/magnesium chelatase; IPR011771 Magnesium-chelatase, subunit H
6308	0.0366013	0.964152	0.983077	1	89.6667	88.5	92.2	Root; GO:0008150 biological_process; GO:0009058 biosynthetic process; IPR006308 DNA polymerase III, alpha subunit, Gram-positive type
19927	0.0348412	0.965842	0.983784	1	44.6667	46	45.2	Root; GO:0008150 biological_process; GO:0006412 translation; IPR000597 Ribosomal protein L3; IPR019927 Ribosomal protein L3, bacterial/organelle-type
8337	0.0309992	0.969543	0.986016	1	19.1667	19.5	18.4	Root; GO:0008150 biological_process; GO:0009058 biosynthetic process; IPR008337 Capsule biosynthesis protein CapB
5764	0.0304925	0.970032	0.986016	1	13.6667	13.5	13	Root; GO:0008150 biological_process; GO:0009058 biosynthetic process; IPR005764 Adenine phosphoribosyl transferase
7260	0.0294163	0.971072	0.986058	1	10	9.83333	10.4	Root; GO:0008150 biological_process; Other; IPR007260 Putative N-acetylmannosamine-6-phosphate epimerase
3682	0.0258565	0.974521	0.987619	1	25.3333	25.3333	26	Root; GO:0008150 biological_process; GO:0016070 RNA metabolic process; IPR003682 rRNA small subunit methyltransferase G
5288	0.0257647	0.97461	0.987619	1	24.5	26	25.2	Root; GO:0008150 biological_process; GO:0009058 biosynthetic process; IPR005288 L-aspartate oxidase
1782	0.023549	0.976765	0.988759	1	3.66667	3.5	3.4	Root; GO:0008150 biological_process; GO:0048870 cell motility; IPR001782 Flagellar P-ring protein
2801	0.021067	0.979184	0.988759	1	9	8.66667	9	Root; GO:0008150 biological_process; GO:0009058 biosynthetic process; IPR002801 Aspartate transcarbamylase regulatory subunit
16263	0.0208609	0.979386	0.988759	1	75.3333	73.8333	73.4	Root; GO:0008150 biological_process; GO:0043934 sporulation; IPR016263 RNA polymerase sporulation-specific sigma factor
6257	0.0204951	0.979743	0.988759	1	3	2.83333	3	Root; GO:0008150 biological_process; GO:0044281 small molecule metabolic process; IPR006257 Dihydrolipoyllysine-residue acetyltransferase component of pyruvate dehydrogenase complex
2571	0.0182146	0.981974	0.989998	1	32.5	32.8333	33.4	Root; GO:0008150 biological_process; Other; IPR002571 Heat-inducible transcription repressor HrcA
4458	0.0140113	0.9861	0.993144	1	3.83333	4	3.8	Root; GO:0008150 biological_process; Other; IPR004458 Translation initiation factor 2, beta subunit
11812	0.00669042	0.993335	0.998393	1	5.16667	5	5	Root; GO:0008150 biological_process; GO:0009058 biosynthetic process; IPR011812 Monofunctional biosynthetic peptidoglycan transglycosylase
4652	0.00420054	0.99581	0.998782	1	47.6667	47.8333	47.4	Root; GO:0008150 biological_process; GO:0055114 oxidation-reduction process; IPR001269 tRNA-dihydrouridine synthase; IPR004652 tRNA-dihydrouridine synthase, TIM-barrel, NifR3
1228	0.00386271	0.996146	0.998782	1	33.3333	33.3333	33	Root; GO:0008150 biological_process; GO:0009058 biosynthetic process; IPR001228 2-C-methyl-D-erythritol 4-phosphate cytidylyltransferase
17684	0.0027396	0.997265	0.998782	1	10.5	10.3333	10.6	Root; GO:0008150 biological_process; GO:0009058 biosynthetic process; IPR017684 Phosphonopyruvate decarboxylase
11895	0.00161343	0.998388	0.998782	1	290.833	291	291.8	Root; GO:0008150 biological_process; GO:0022900 electron transport chain; IPR011895 Pyruvate-flavodoxin oxidoreductase
27939	0.00121869	0.998782	0.998782	1	20.3333	20.5	20.6	Root; GO:0008150 biological_process; GO:0009058 biosynthetic process; IPR027939 NMT1/THI5 family

## Sheet: Title
		Supplementary Table 3. Core function calculation results. The “All core” table lists the identified functions present in all samples. The enzyme groups associated with metabolic functions related to biogas formation are highlighted with various colors (for explanation see text). The “All metabolic functions” table summarizes the enzymes, using the same highlights, which were identified in some bu…

## Sheet: Sign Diff core
Test-Statistic	P	FDR_P	Bonferroni_P	Maize_silage_mean	Co-digestion_mean	Chlorella_vulgaris_mean	function
3.70376	0.049287	0.462722	1	78.3333	61.5	45.5	Root; GO:0008150 biological_process; GO:0005975 carbohydrate metabolic process; IPR001701 Glycoside hydrolase, family 9
3.89077	0.0435322	0.431427	1	12.1667	8.5	5.66667	Root; GO:0008150 biological_process; GO:0005975 carbohydrate metabolic process; IPR000514 Glycoside hydrolase, family 39
4.01532	0.0401227	0.404093	1	64	51.3333	40.5	Root; GO:0008150 biological_process; GO:0019538 protein metabolic process; IPR018044 Peptidase S11, D-alanyl-D-alanine carboxypeptidase A
4.07496	0.038598	0.396835	1	62.5	81.6667	69.8333	Root; GO:0008150 biological_process; GO:0055114 oxidation-reduction process; IPR006478 Formate dehydrogenase, alpha subunit
4.11341	0.0376496	0.395321	1	59.1667	77.6667	75	Root; GO:0008150 biological_process; GO:0009058 biosynthetic process; IPR000438 Acetyl-CoA carboxylase carboxyl transferase, beta subunit
4.84114	0.0238669	0.373914	1	9	5.16667	4.83333	Root; GO:0008150 biological_process; GO:0005975 carbohydrate metabolic process; IPR017583 Tagatose/fructose phosphokinase; IPR022463 Fructose 1-phosphate kinase
5.10398	0.0203775	0.36689	1	75	65.3333	49	Root; GO:0008150 biological_process; Other; IPR000581 Dihydroxy-acid/6-phosphogluconate dehydratase; IPR004404 Dihydroxy-acid dehydratase
5.40925	0.0170295	0.352977	1	13.6667	11	7	Root; GO:0008150 biological_process; GO:0005975 carbohydrate metabolic process; IPR002037 Glycoside hydrolase, family 8
5.42448	0.0168796	0.352977	1	17	18.6667	12.5	Root; GO:0008150 biological_process; GO:0006810 transport; GO:0006811 ion transport; IPR003474 Gluconate transporter
5.88157	0.0130064	0.352977	1	26.1667	35	44.6667	Root; GO:0008150 biological_process; GO:0055114 oxidation-reduction process; IPR012136 NADP transhydrogenase, beta subunit
6.02552	0.0120034	0.352977	1	10.3333	10	1.83333	Root; GO:0008150 biological_process; GO:0005975 carbohydrate metabolic process; IPR007666 ADP-specific phosphofructokinase/glucokinase; IPR015990 ADP-specific phosphofructokinase/glucokinase, archaeal
6.28842	0.0103897	0.352977	1	7.83333	8.16667	4.16667	Root; GO:0008150 biological_process; Other; IPR004788 Ribose 5-phosphate isomerase, type A; IPR020672 Ribose-5-phosphate isomerase, type A, subgroup
6.66667	0.00848109	0.352977	1	7.16667	3.16667	2.16667	Root; GO:0008150 biological_process; GO:0005975 carbohydrate metabolic process; IPR000556 Glycoside hydrolase, 48F
6.73913	0.00816269	0.352977	1	8.66667	6.5	4	Root; GO:0008150 biological_process; GO:0016043 cellular component organization; IPR004392 Hydrogenase accessory protein HypB
6.91948	0.00742743	0.352977	1	17.6667	15.3333	7.66667	Root; GO:0008150 biological_process; GO:0019538 protein metabolic process; IPR004421 Carbamoyltransferase, HypF-type
7.29058	0.00613861	0.318885	1	22.3333	22.1667	13	Root; GO:0008150 biological_process; GO:0009058 biosynthetic process; IPR016457 Formylmethanofuran dehydrogenase, subunit B
7.49841	0.00552867	0.303155	1	14.5	18.8333	9.5	Root; GO:0008150 biological_process; GO:0006810 transport; GO:0006811 ion transport; IPR005876 Cobalt transport protein ATP-binding subunit
7.70408	0.00499181	0.299119	1	3	4.5	2.16667	Root; GO:0008150 biological_process; GO:0009058 biosynthetic process; IPR024902 FAD synthase RibL
9.18605	0.0024849	0.253203	1	6.5	6.66667	2.66667	Root; GO:0008150 biological_process; GO:0044281 small molecule metabolic process; IPR003209 Methenyltetrahydromethanopterin cyclohydrolase
9.74732	0.00193886	0.253203	1	8	12	5.16667	Root; GO:0008150 biological_process; GO:0055114 oxidation-reduction process; IPR011777 Geranylgeranyl reductase family; IPR023590 Digeranylgeranylglycerophospholipid reductase
10.0145	0.00172772	0.253203	1	43	36.5	20.5	Root; GO:0008150 biological_process; GO:0009058 biosynthetic process; IPR012134 Glutamate-5-semialdehyde dehydrogenase
10.1186	0.00165259	0.253203	1	18.3333	17.3333	10.8333	Root; GO:0008150 biological_process; GO:0019538 protein metabolic process; IPR004408 Biotin--acetyl-CoA-carboxylase ligase; IPR030855 Bifunctional ligase/repressor BirA
10.7396	0.00127449	0.253203	1	12	8.33333	4.66667	Root; GO:0008150 biological_process; GO:0009058 biosynthetic process; IPR000860 Porphobilinogen deaminase
10.8306	0.00122782	0.253203	1	29	20.3333	16.1667	Root; GO:0008150 biological_process; GO:0009058 biosynthetic process; IPR001057 Glutamate/acetylglutamate kinase; IPR005715 Glutamate 5-kinase/delta-1-pyrroline-5-carboxylate synthase; IPR011529 Glutamate 5-kinase
11.357	0.000992912	0.253203	0.980004	31	28.6667	16.1667	Root; GO:0008150 biological_process; GO:0009058 biosynthetic process; IPR002817 Phosphomethylpyrimidine synthase

## Sheet: Sub core
Maize silage (function)	Chlorella vulgaris (function)	Co-digestion (function)
Root; GO:0008150 biological_process; GO:0009058 biosynthetic process; IPR011858 Phosphoribosylformimino-5-aminoimidazole carboxamide ribotide isomerase, eukaryotic	Root; GO:0008150 biological_process; GO:0005975 carbohydrate metabolic process; IPR000771 Ketose-bisphosphate aldolase, class-II; IPR011288 D-tagatose-bisphosphate aldolase, class II, subunit KbaY/GatY; IPR023955 D-tagatose-bisphosphate aldolase, class II, subunit GatY	Root; GO:0008150 biological_process; GO:0006810 transport; IPR004704 Phosphotransferase system, mannose/fructose/sorbose family IID component; IPR018405 Phosphotransferase system, mannose/fructose/sorbose family IID component, subgroup
Root; GO:0008150 biological_process; Other; IPR007213 Leucine carboxyl methyltransferase; IPR011610 S-adenosyl-L-methionine-dependent methyltransferase, putative	Root; GO:0008150 biological_process; GO:0009056 catabolic process; IPR004616 Leucyl/phenylalanyl-tRNA-protein transferase	Root; GO:0008150 biological_process; GO:0009058 biosynthetic process; IPR002773 Deoxyhypusine synthase; IPR022899 Deoxyhypusine synthase, putative, archaeal
Root; GO:0008150 biological_process; GO:0009058 biosynthetic process; IPR002692 Penicillin/cephalosporin acylase; IPR014395 Penicillin acylase	Root; GO:0008150 biological_process; Other; IPR000413 Integrin alpha chain	Root; GO:0008150 biological_process; GO:0006810 transport; IPR001734 Sodium/solute symporter; IPR019899 Sodium/solute symporter, VC2705 subfamily
Root; GO:0008150 biological_process; GO:0009058 biosynthetic process; IPR008690 Tetrahydromethanopterin S-methyltransferase subunit B	Root; GO:0008150 biological_process; Other; IPR002933 Peptidase M20; IPR017150 Peptidase M20, glutamate carboxypeptidase	Root; GO:0008150 biological_process; GO:0006412 translation; IPR000266 Ribosomal protein S17/S11; IPR028333 Ribosomal protein S17, archaeal/eukaryotic
Root; GO:0008150 biological_process; GO:0006810 transport; GO:0006811 ion transport; IPR005667 Sulphate ABC transporter permease protein 2; IPR011866 Sulphate ABC transporter, permease protein CysW	Root; GO:0008150 biological_process; Other; IPR001544 Aminotransferase class IV; IPR005784 D-amino acid aminotransferase	Root; GO:0008150 biological_process; GO:0006412 translation; IPR002674 Ribosomal protein L37ae
Root; GO:0008150 biological_process; GO:0055114 oxidation-reduction process; IPR014349 Rieske iron-sulphur protein	Root; GO:0008150 biological_process; GO:0009058 biosynthetic process; IPR002631 Plasmid replication protein	Root; GO:0008150 biological_process; GO:0009056 catabolic process; IPR016218 Acetyl-CoA decarbonylase/synthase complex, gamma subunit; IPR023427 Acetyl-CoA decarbonylase/synthase complex, gamma subunit, archaea
Root; GO:0008150 biological_process; GO:0006810 transport; IPR000185 Protein translocase subunit SecA; IPR026389 Protein translocase subunit SecA, Actinobacteria-type	Root; GO:0008150 biological_process; GO:0051301 cell division; IPR011922 Cell division protein FtsL	Root; GO:0008150 biological_process; GO:0006412 translation; IPR001971 Ribosomal protein S11; IPR019961 Ribosomal protein S11, archaeal
Root; GO:0008150 biological_process; GO:0009056 catabolic process; IPR017395 Chlorophyllase	Root; GO:0008150 biological_process; GO:0005975 carbohydrate metabolic process; IPR008000 Rhamnose mutarotase; IPR013448 L-rhamnose mutarotase	Root; GO:0008150 biological_process; GO:0006810 transport; IPR000425 Major intrinsic protein; IPR023743 Aquaporin Z
Root; GO:0008150 biological_process; GO:0009058 biosynthetic process; IPR002161 Pyridoxal 5'-phosphate synthase subunit PdxT/SNO	Root; GO:0008150 biological_process; GO:0009058 biosynthetic process; IPR000568 ATPase, F0 complex, subunit A; IPR017692 Alternate F1F0 ATPase, F0 subunit A	Root; GO:0008150 biological_process; GO:0006412 translation; IPR013025 Ribosomal protein L25/L23; IPR019985 Ribosomal protein L23
Root; GO:0008150 biological_process; Other; IPR006291 Transcriptional regulatory protein PcoR, heavy metal response	Root; GO:0008150 biological_process; GO:0009058 biosynthetic process; IPR017755 N-carbamoylputrescine amidase	Root; GO:0008150 biological_process; GO:0009058 biosynthetic process; IPR008225 Coenzyme F420:L-glutamate ligase; IPR023659 Coenzyme F420:L-glutamate ligase, archaeal
Root; GO:0008150 biological_process; GO:0005975 carbohydrate metabolic process; IPR004560 L-ribulose-5-phosphate 3-epimerase	Root; GO:0008150 biological_process; GO:0005975 carbohydrate metabolic process; IPR000490 Glycoside hydrolase, family 17	Root; GO:0008150 biological_process; GO:0009058 biosynthetic process; IPR004298 Nicotianamine synthase
Root; GO:0008150 biological_process; GO:0006259 DNA metabolic process; IPR006344 RecBCD enzyme subunit RecD	Root; GO:0008150 biological_process; GO:0006810 transport; GO:0009306 protein secretion; IPR001712 Type III secretion system FHIPEP; IPR006302 Type III secretion protein HrcV	Root; GO:0008150 biological_process; GO:0006259 DNA metabolic process; IPR011939 DNA repair and recombination protein RadB
Root; GO:0008150 biological_process; GO:0009058 biosynthetic process; IPR000829 Diacylglycerol kinase, prokaryotic	Root; GO:0008150 biological_process; GO:0006351 transcription, DNA-templated; IPR000268 DNA-directed RNA polymerase, subunit N/Rpb10	Root; GO:0008150 biological_process; GO:0006259 DNA metabolic process; IPR011946 Integrase, integron-type
Root; GO:0008150 biological_process; GO:0009058 biosynthetic process; IPR004572 Protoporphyrinogen oxidase	Root; GO:0008150 biological_process; GO:0055114 oxidation-reduction process; IPR004436 Isocitrate dehydrogenase NADP-dependent, monomeric	Root; GO:0008150 biological_process; GO:0009058 biosynthetic process; IPR027534 Ribosomal protein L12 family
Root; GO:0008150 biological_process; Other; IPR017275 Transcription factor FapR	Root; GO:0008150 biological_process; GO:0009058 biosynthetic process; IPR012165 Cytochrome-c3 hydrogenase, gamma subunit; IPR014260 Sulphite reductase, subunit B	Root; GO:0008150 biological_process; GO:0016070 RNA metabolic process; IPR002745 Phosphotransferase KptA/Tpt1; IPR022928 RNA 2'-phosphotransferase KptA, putative
Root; GO:0008150 biological_process; GO:0009058 biosynthetic process; IPR010111 Kynureninase	Root; GO:0008150 biological_process; GO:0009058 biosynthetic process; IPR005294 ATPase, F1 complex, alpha subunit; IPR017710 Alternate F1F0 ATPase, F1 subunit alpha	Root; GO:0008150 biological_process; GO:0009058 biosynthetic process; IPR007833 Capsule polysaccharide biosynthesis
Root; GO:0008150 biological_process; GO:0019538 protein metabolic process; IPR008252 Peptidase S15, X-Pro dipeptidyl-peptidase	Root; GO:0008150 biological_process; GO:0009056 catabolic process; IPR010102 Succinate semialdehyde dehydrogenase	Root; GO:0008150 biological_process; GO:0009058 biosynthetic process; IPR006765 Polyketide synthesis cyclase
Root; GO:0008150 biological_process; GO:0006807 nitrogen compound metabolic process; IPR015942 Asp/Glu/hydantoin racemase; IPR001920 Asp/Glu racemase	Root; GO:0008150 biological_process; GO:0045333 cellular respiration; IPR024791 Cytochrome c oxidase subunit III	Root; GO:0008150 biological_process; GO:0009058 biosynthetic process; IPR000123 RNA-directed DNA polymerase (reverse transcriptase), msDNA
Root; GO:0008150 biological_process; GO:0009058 biosynthetic process; IPR003333 Mycolic acid cyclopropane synthase	Root; GO:0008150 biological_process; GO:0009058 biosynthetic process; IPR014286 RNA polymerase sigma-70 RpoE type	Root; GO:0008150 biological_process; GO:0005975 carbohydrate metabolic process; IPR009648 Biotin-dependent malonate decarboxylase, gamma subunit
Root; GO:0008150 biological_process; GO:0006412 translation; IPR001569 Ribosomal protein L37e	Root; GO:0008150 biological_process; GO:0006810 transport; IPR006469 NifC-like ABC-type porter	Root; GO:0008150 biological_process; GO:0009058 biosynthetic process; IPR010072 D-alanine--poly(phosphoribitol) ligase subunit 1
Root; GO:0008150 biological_process; GO:0006810 transport; GO:0006811 ion transport; IPR031563 Molybdate transporter 1/2	Root; GO:0008150 biological_process; GO:0009058 biosynthetic process; IPR030310 Long-chain-fatty-acid--CoA ligase FadD17	Root; GO:0008150 biological_process; GO:0009058 biosynthetic process; IPR004558 Coproporphyrinogen III oxidase, oxygen-independent, HemN
Root; GO:0008150 biological_process; GO:0006810 transport; GO:0006811 ion transport; IPR005669 Thiosulphate/Sulfate-binding protein	Root; GO:0008150 biological_process; GO:0009058 biosynthetic process; IPR017691 ATP synthase subunit beta, bacterial and archaeal	Root; GO:0008150 biological_process; GO:0006810 transport; IPR005700 Exopolysaccharide transport protein
Root; GO:0008150 biological_process; GO:0055114 oxidation-reduction process; IPR014436 Extradiol aromatic ring-opening dioxygenase, DODA type	Root; GO:0008150 biological_process; GO:0006810 transport; IPR017875 Aliphatic sulfonates import ATP-binding protein SsuB	Root; GO:0008150 biological_process; GO:0009056 catabolic process; IPR011807 Exosome complex component Rrp41
Root; GO:0008150 biological_process; GO:0048870 cell motility; IPR005503 Flagellar basal body-associated protein FliL	Root; GO:0008150 biological_process; GO:0055114 oxidation-reduction process; IPR020946 Flavin monooxygenase-like	Root; GO:0008150 biological_process; GO:0009058 biosynthetic process; IPR011307 Tetrahydromethanopterin S-methyltransferase, subunit F
Root; GO:0008150 biological_process; GO:0006810 transport; IPR011701 Major facilitator superfamily; IPR022324 Bacilysin exporter BacE, putative	Root; GO:0008150 biological_process; GO:0055114 oxidation-reduction process; IPR023663 NADPH dehydrogenase	Root; GO:0008150 biological_process; GO:0006810 transport; IPR018389 Bacterial extracellular solute-binding protein, family 7; IPR026289 Solute binding protein, mannitol/chloroaromatic system-like
Root; GO:0008150 biological_process; GO:0044281 small molecule metabolic process; IPR012794 Beta-ketoadipate transcriptional regulator, PcaR/PcaU/PobR	Root; GO:0008150 biological_process; GO:0045333 cellular respiration; IPR000883 Cytochrome c oxidase subunit I; IPR004677 Cytochrome c oxidase cbb3-type, subunit I	Root; GO:0008150 biological_process; GO:0005975 carbohydrate metabolic process; IPR000771 Ketose-bisphosphate aldolase, class-II; IPR006412 Fructose-bisphosphate aldolase, class II, Calvin cycle subtype
Root; GO:0008150 biological_process; GO:0006810 transport; IPR003423 Outer membrane efflux protein; IPR028351 Cyclolysin transport protein CyaE	Root; GO:0008150 biological_process; GO:0009056 catabolic process; IPR010708 5'(3')-deoxyribonucleotidase	Root; GO:0008150 biological_process; GO:0006412 translation; IPR000289 Ribosomal protein S28e
Root; GO:0008150 biological_process; GO:0009058 biosynthetic process; IPR004561 Isochorismate synthase	Root; GO:0008150 biological_process; GO:0051186 cofactor metabolic process; IPR003702 Acetyl-CoA hydrolase/transferase; IPR023990 Butyryl-CoA:acetate CoA-transferase	Root; GO:0008150 biological_process; GO:0016070 RNA metabolic process; IPR006676 tRNA-splicing endonuclease; IPR023516 tRNA-splicing endonuclease, archaeal long subfamily
Root; GO:0008150 biological_process; GO:0009058 biosynthetic process; IPR000659 Pyridoxamine 5'-phosphate oxidase	Root; GO:0008150 biological_process; GO:0055114 oxidation-reduction process; IPR000447 FAD-dependent glycerol-3-phosphate dehydrogenase; IPR017752 Glycerol-3-phosphate dehydrogenase, GlpA subunit	Root; GO:0008150 biological_process; GO:0009058 biosynthetic process; IPR003705 Cobalt transport protein CbiN
Root; GO:0008150 biological_process; Other; IPR007412 Anti-sigma-28 factor, FlgM		Root; GO:0008150 biological_process; GO:0009056 catabolic process; IPR012695 2-methylisocitrate lyase
Root; GO:0008150 biological_process; GO:0019538 protein metabolic process; IPR005320 Peptidase S51; IPR011811 Peptidase S51, cyanophycinase		Root; GO:0008150 biological_process; GO:0006412 translation; IPR015324 Ribosomal protein Rsm22, bacterial-type
Root; GO:0008150 biological_process; GO:0048870 cell motility; IPR012823 Flagellar export FliJ		Root; GO:0008150 biological_process; GO:0009056 catabolic process; IPR017820 Sulphoacetaldehyde acetyltransferase
Root; GO:0008150 biological_process; GO:0009056 catabolic process; IPR028971 NAD-glutamate dehydrogenase		Root; GO:0008150 biological_process; GO:0042592 homeostatic process; IPR006741 Accessory gene regulator B
Root; GO:0008150 biological_process; GO:0006807 nitrogen compound metabolic process; IPR010043 Bifunctional uridylyltransferase/uridylyl-removing enzyme		Root; GO:0008150 biological_process; GO:0016043 cellular component organization; IPR001631 DNA topoisomerase I
Root; GO:0008150 biological_process; GO:0006810 transport; IPR003423 Outer membrane efflux protein; IPR010130 Type I secretion outer membrane protein, TolC		Root; GO:0008150 biological_process; GO:0006810 transport; GO:0006811 ion transport; IPR017922 sn-glycerol-3-phosphate import ATP-binding protein UgpC
Root; GO:0008150 biological_process; GO:0006810 transport; IPR004324 Folate-biopterin transporter		Root; GO:0008150 biological_process; GO:0005975 carbohydrate metabolic process; IPR005593 Xylulose 5-phosphate/Fructose 6-phosphate phosphoketolase; IPR023962 Probable phosphoketolase
Root; GO:0008150 biological_process; GO:0044281 small molecule metabolic process; IPR006231 Malate:quinone-oxidoreductase
Root; GO:0008150 biological_process; GO:0016043 cellular component organization; IPR005742 DNA topoisomerase IV, subunit A, Gram-negative
Root; GO:0008150 biological_process; GO:0006351 transcription, DNA-templated; IPR006110 RNA polymerase, subunit omega/K/RPB6; IPR006111 Archaeal RpoK/eukaryotic RPB6 RNA polymerase subunit
Root; GO:0008150 biological_process; Other; IPR006699 Glycerol-3-phosphate responsive antiterminator
Root; GO:0008150 biological_process; GO:0009056 catabolic process; IPR005065 Platelet-activating factor acetylhydrolase
Root; GO:0008150 biological_process; GO:0006810 transport; GO:0006811 ion transport; IPR002758 Na+/H+ antiporter subunit E
Root; GO:0008150 biological_process; GO:0006259 DNA metabolic process; IPR026851 Dna2
Root; GO:0008150 biological_process; GO:0009058 biosynthetic process; IPR002504 NAD kinase; IPR011391 Acetoin catabolism kinase AcoX
Root; GO:0008150 biological_process; GO:0006807 nitrogen compound metabolic process; IPR008180 Deoxyuridine triphosphate nucleotidohydrolase/Deoxycytidine triphosphate deaminase; IPR023537 Deoxyuridine triphosphate nucleotidohydrolase, archaeal
Root; GO:0008150 biological_process; GO:0009058 biosynthetic process; IPR010192 2-succinylbenzoate--CoA ligase
Root; GO:0008150 biological_process; GO:0016043 cellular component organization; IPR028622 ATP-dependent RNA helicase RhlE
Root; GO:0008150 biological_process; GO:0009058 biosynthetic process; IPR005551 Apo-citrate lyase phosphoribosyl-dephospho-CoA transferase
Root; GO:0008150 biological_process; GO:0005975 carbohydrate metabolic process; IPR005193 Glycoside hydrolase, family 62, arabinosidase
Root; GO:0008150 biological_process; GO:0006810 transport; GO:0006811 ion transport; IPR000428 Copper ion binding protein
Root; GO:0008150 biological_process; GO:0006259 DNA metabolic process; IPR003491 Replication initiation factor
Root; GO:0008150 biological_process; GO:0006259 DNA metabolic process; IPR008148 DNA photolyase, class 2
Root; GO:0008150 biological_process; GO:0007154 cell communication; IPR008674 Non-histone chromosomal MC1
Root; GO:0008150 biological_process; GO:0006810 transport; GO:0006811 ion transport; IPR005667 Sulphate ABC transporter permease protein 2; IPR011865 Sulphate ABC transporter, permease protein CysT
Root; GO:0008150 biological_process; GO:0005975 carbohydrate metabolic process; IPR006256 Dihydrolipoamide acetyltransferase pyruvate dehydrogenase complex
Root; GO:0008150 biological_process; GO:0055114 oxidation-reduction process; IPR026255 NAD(P) transhydrogenase, alpha subunit
Root; GO:0008150 biological_process; GO:0006810 transport; GO:0006811 ion transport; IPR017882 Zinc import ATP-binding protein ZnuC
Root; GO:0008150 biological_process; GO:0006810 transport; GO:0006811 ion transport; IPR014738 Citrate transporter
Root; GO:0008150 biological_process; GO:0016043 cellular component organization; IPR010379 Septation ring formation regulator EzrA
Root; GO:0008150 biological_process; Other; IPR007820 AbrB family
Root; GO:0008150 biological_process; GO:0006412 translation; IPR000552 Ribosomal protein L44e
Root; GO:0008150 biological_process; GO:0006810 transport; GO:0009306 protein secretion; IPR002191 Bacterial export protein family 3; IPR006305 Flagellar biosynthesis protein FliQ
Root; GO:0008150 biological_process; GO:0006629 lipid metabolic process; IPR016636 3-oxo-5-alpha-steroid 4-dehydrogenase
Root; GO:0008150 biological_process; GO:0006412 translation; IPR001976 Ribosomal protein S24e
Root; GO:0008150 biological_process; GO:0055114 oxidation-reduction process; IPR001804 Isocitrate and isopropylmalate dehydrogenases family; IPR011829 Tartrate dehydrogenase
Root; GO:0008150 biological_process; GO:0006810 transport; GO:0006811 ion transport; IPR003370 Chromate transporter; IPR014047 Chromate transporter, long chain
Root; GO:0008150 biological_process; GO:0007154 cell communication; IPR009951 Host-nuclease inhibitor protein Gam
Root; GO:0008150 biological_process; GO:0055114 oxidation-reduction process; IPR017476 UDP-glucose/GDP-mannose dehydrogenase; IPR028356 UDP-glucose 6-dehydrogenase, eukaryotic type
Root; GO:0008150 biological_process; GO:0055114 oxidation-reduction process; IPR010758 Trans-2-enoyl-CoA reductase

## Sheet: Functions in some but not all
Root; GO:0008150 biological_process; GO:0005975 carbohydrate metabolic process; IPR002037 Glycoside hydrolase, family 8
Root; GO:0008150 biological_process; GO:0005975 carbohydrate metabolic process; IPR002241 Glycoside hydrolase, family 27
Root; GO:0008150 biological_process; GO:0005975 carbohydrate metabolic process; IPR000514 Glycoside hydrolase, family 39
Root; GO:0008150 biological_process; GO:0005975 carbohydrate metabolic process; IPR001701 Glycoside hydrolase, family 9
Root; GO:0008150 biological_process; GO:0005975 carbohydrate metabolic process; IPR000743 Glycoside hydrolase, family 28
Root; GO:0008150 biological_process; GO:0005975 carbohydrate metabolic process; IPR000933 Glycoside hydrolase, family 29; IPR016286 Alpha-L-fucosidase, metazoa-type
Root; GO:0008150 biological_process; GO:0005975 carbohydrate metabolic process; IPR003385 Glycoside hydrolase, family 77
Root; GO:0008150 biological_process; GO:0005975 carbohydrate metabolic process; IPR006710 Glycoside hydrolase, family 43; IPR016840 Glycoside hydrolase, family 43, endo-1, 5-alpha-L-arabinosidase
Root; GO:0008150 biological_process; GO:0005975 carbohydrate metabolic process; IPR003476 Glycoside hydrolase, family 42
Root; GO:0008150 biological_process; GO:0005975 carbohydrate metabolic process; IPR000322 Glycoside hydrolase family 31
Root; GO:0008150 biological_process; GO:0005975 carbohydrate metabolic process; IPR000490 Glycoside hydrolase, family 17
Root; GO:0008150 biological_process; GO:0005975 carbohydrate metabolic process; IPR002516 Glycosyl transferase, family 11
Root; GO:0008150 biological_process; GO:0005975 carbohydrate metabolic process; IPR001661 Glycoside hydrolase, family 37; IPR023715 Trehalase, cytoplasmic
Root; GO:0008150 biological_process; GO:0005975 carbohydrate metabolic process; IPR000805 Glycoside hydrolase, family 26; IPR016714 Mannan endo-1,4-beta-mannosidase
Root; GO:0008150 biological_process; GO:0005975 carbohydrate metabolic process; IPR004139 Glycosyl transferase, family 13
Root; GO:0008150 biological_process; GO:0009058 biosynthetic process; IPR003440 Glycosyl transferase, family 48
Root; GO:0008150 biological_process; GO:0005975 carbohydrate metabolic process; IPR002252 Glycoside hydrolase family 36
Root; GO:0008150 biological_process; GO:0005975 carbohydrate metabolic process; IPR005193 Glycoside hydrolase, family 62, arabinosidase
Root; GO:0008150 biological_process; GO:0005975 carbohydrate metabolic process; IPR001362 Glycoside hydrolase, family 32; IPR006232 Sucrose-6-phosphate hydrolase
Root; GO:0008150 biological_process; GO:0005975 carbohydrate metabolic process; IPR000852 Glycoside hydrolase, family 52
Root; GO:0008150 biological_process; GO:0005975 carbohydrate metabolic process; IPR006101 Glycoside hydrolase, family 2; IPR023933 Glycoside hydrolase, family 2, beta-galactosidase
Root; GO:0008150 biological_process; GO:0005975 carbohydrate metabolic process; IPR001088 Glycoside hydrolase, family 4
Root; GO:0008150 biological_process; GO:0005975 carbohydrate metabolic process; IPR001360 Glycoside hydrolase, family 1; IPR017736 Glycoside hydrolase, family 1, beta-glucosidase
Root; GO:0008150 biological_process; GO:0005975 carbohydrate metabolic process; IPR004888 Glycoside hydrolase family 63
Root; GO:0008150 biological_process; GO:0005975 carbohydrate metabolic process; IPR001503 Glycosyl transferase family 10
Root; GO:0008150 biological_process; GO:0019538 protein metabolic process; IPR018044 Peptidase S11, D-alanyl-D-alanine carboxypeptidase A
Root; GO:0008150 biological_process; GO:0019538 protein metabolic process; IPR005322 Peptidase C69, dipeptidase A
Root; GO:0008150 biological_process; GO:0019538 protein metabolic process; IPR000200 Peptidase C10, streptopain
Root; GO:0008150 biological_process; GO:0019538 protein metabolic process; IPR008256 Peptidase S1B; IPR008353 Peptidase S1B, exfoliative toxin
Root; GO:0008150 biological_process; GO:0019538 protein metabolic process; IPR001539 Peptidase U32
Root; GO:0008150 biological_process; GO:0019538 protein metabolic process; IPR005081 Peptidase U4, sporulation factor SpoIIGA
Root; GO:0008150 biological_process; GO:0019538 protein metabolic process; IPR008252 Peptidase S15, X-Pro dipeptidyl-peptidase
Root; GO:0008150 biological_process; GO:0019538 protein metabolic process; IPR002470 Peptidase S9A, prolyl oligopeptidase
Root; GO:0008150 biological_process; GO:0006807 nitrogen compound metabolic process; IPR001733 Peptidase S26B
Root; GO:0008150 biological_process; GO:0019538 protein metabolic process; IPR001872 Peptidase A8, signal peptidase II
Root; GO:0008150 biological_process; GO:0019538 protein metabolic process; IPR000841 Peptidase M23A, B-lytic metalloendopeptidase
Root; GO:0008150 biological_process; GO:0019538 protein metabolic process; IPR004134 Peptidase C1B, bleomycin hydrolase
Root; GO:0008150 biological_process; GO:0019538 protein metabolic process; IPR000667 Peptidase S13, D-Ala-D-Ala carboxypeptidase C
Root; GO:0008150 biological_process; GO:0006807 nitrogen compound metabolic process; IPR004634 Peptidase S49, protease IV
Root; GO:0008150 biological_process; GO:0019538 protein metabolic process; IPR005320 Peptidase S51; IPR023172 Peptidase S51, dipeptidase E
Root; GO:0008150 biological_process; GO:0019538 protein metabolic process; IPR021190 Peptidase M10A
Root; GO:0008150 biological_process; GO:0019538 protein metabolic process; IPR001333 Peptidase M32, carboxypeptidase Taq metallopeptidase
Root; GO:0008150 biological_process; GO:0019538 protein metabolic process; IPR000787 Peptidase M29, aminopeptidase II
Root; GO:0008150 biological_process; GO:0019538 protein metabolic process; IPR001316 Peptidase S1A, streptogrisin
Root; GO:0008150 biological_process; GO:0019538 protein metabolic process; IPR015567 Peptidase M14B, caboxypeptidase D
Root; GO:0008150 biological_process; Other; IPR002933 Peptidase M20; IPR005941 Succinyl-diaminopimelate desuccinylase, proteobacteria
Root; GO:0008150 biological_process; GO:0019538 protein metabolic process; IPR001567 Peptidase M3A/M3B; IPR004438 Peptidase M3B, oligoendopeptidase F
Root; GO:0008150 biological_process; GO:0019538 protein metabolic process; IPR002169 Peptidase M9A/M9B, collagenase, bacterial
Root; GO:0008150 biological_process; GO:0019538 protein metabolic process; IPR005314 Peptidase C50, separase
Root; GO:0008150 biological_process; GO:0019538 protein metabolic process; IPR000710 Peptidase S6, IgA endopeptidase
Root; GO:0008150 biological_process; GO:0019538 protein metabolic process; IPR001096 Peptidase C13, legumain; IPR028361 GPI-anchor transamidase
Root; GO:0008150 biological_process; GO:0019538 protein metabolic process; IPR022684 Peptidase C2, calpain family
Root; GO:0008150 biological_process; GO:0019538 protein metabolic process; IPR000250 Peptidase G1
Root; GO:0008150 biological_process; GO:0019538 protein metabolic process; IPR016294 Peptidase M10B
Root; GO:0008150 biological_process; GO:0019538 protein metabolic process; IPR001948 Peptidase M18; IPR022983 M18 family aminopeptidase 1, putative
Root; GO:0008150 biological_process; GO:0019538 protein metabolic process; IPR008758 Peptidase S28
Root; GO:0008150 biological_process; GO:0019538 protein metabolic process; IPR002610 Peptidase S54, rhomboid; IPR023662 Rhomboid protease GlpG
Root; GO:0008150 biological_process; GO:0019538 protein metabolic process; IPR001567 Peptidase M3A/M3B; IPR011977 Peptidase M3B, oligoendopeptidase-related clade 3
Root; GO:0008150 biological_process; GO:0019538 protein metabolic process; IPR001940 Peptidase S1C; IPR011782 Peptidase S1C, Do
Root; GO:0008150 biological_process; GO:0019538 protein metabolic process; IPR001930 Peptidase M1, alanine aminopeptidase/leukotriene A4 hydrolase; IPR012779 Peptidase M1, alanyl aminopeptidase
Root; GO:0008150 biological_process; GO:0019538 protein metabolic process; IPR004387 Peptidase M50, putative membrane-associated zinc metallopeptidase
Root; GO:0008150 biological_process; GO:0019538 protein metabolic process; IPR001563 Peptidase S10, serine carboxypeptidase
Root; GO:0008150 biological_process; GO:0019538 protein metabolic process; IPR001314 Peptidase S1A, chymotrypsin-type
Root; GO:0008150 biological_process; GO:0019538 protein metabolic process; IPR005073 Peptidase M74, penicillin-insensitive murein endopeptidase
Root; GO:0008150 biological_process; GO:0019538 protein metabolic process; IPR005080 Peptidase A25, germination protease
Root; GO:0008150 biological_process; GO:0019538 protein metabolic process; IPR001940 Peptidase S1C; IPR011783 Peptidase S1C, DegS
Root; GO:0008150 biological_process; GO:0019538 protein metabolic process; IPR001548 Peptidase M2, peptidyl-dipeptidase A
Root; GO:0008150 biological_process; GO:0019538 protein metabolic process; IPR000013 Peptidase M7, snapalysin
Root; GO:0008150 biological_process; GO:0019538 protein metabolic process; IPR001567 Peptidase M3A/M3B; IPR011976 Peptidase M3B, oligoendopeptidase-related clade 2
Root; GO:0008150 biological_process; GO:0019538 protein metabolic process; IPR001577 Peptidase M8, leishmanolysin
Root; GO:0008150 biological_process; GO:0019538 protein metabolic process; IPR023612 Peptidase M4
Root; GO:0008150 biological_process; GO:0019538 protein metabolic process; IPR001930 Peptidase M1, alanine aminopeptidase/leukotriene A4 hydrolase; IPR012778 Peptidase M1, aminopeptidase
Root; GO:0008150 biological_process; GO:0019538 protein metabolic process; IPR000223 Peptidase S26A, signal peptidase I
Root; GO:0008150 biological_process; GO:0019538 protein metabolic process; IPR000718 Peptidase M13
Root; GO:0008150 biological_process; GO:0009058 biosynthetic process; IPR000559 Formate-tetrahydrofolate ligase, FTHFS
Root; GO:0008150 biological_process; GO:0055114 oxidation-reduction process; IPR001821 [NiFe]-hydrogenase, small subunit
Root; GO:0008150 biological_process; GO:0019538 protein metabolic process; IPR000688 Hydrogenase nickel incorporation protein HypA/HybF
Root; GO:0008150 biological_process; Other; IPR001753 Crotonase superfamily; IPR009188 [NiFe]-hydrogenase maturation factor, HypX/HoxX type
Root; GO:0008150 biological_process; GO:0009058 biosynthetic process; IPR005244 FO synthase, subunit 2-like; IPR024021 [FeFe]-hydrogenase maturation HydE, radical SAM
Root; GO:0008150 biological_process; GO:0044281 small molecule metabolic process; IPR003209 Methenyltetrahydromethanopterin cyclohydrolase
Root; GO:0008150 biological_process; GO:0009058 biosynthetic process; IPR016457 Formylmethanofuran dehydrogenase, subunit B
Root; GO:0008150 biological_process; GO:0009058 biosynthetic process; IPR008690 Tetrahydromethanopterin S-methyltransferase subunit B
Root; GO:0008150 biological_process; GO:0009058 biosynthetic process; IPR012653 Dimethylamine methyltransferase MtbB
Root; GO:0008150 biological_process; GO:0009058 biosynthetic process; IPR017678 CoB--CoM heterodisulphide reductase, subunit B
Root; GO:0008150 biological_process; GO:0009058 biosynthetic process; IPR010426 Trimethylamine methyltransferase; IPR012740 Trimethylamine methyltransferase, Methanosarcina
Root; GO:0008150 biological_process; GO:0009056 catabolic process; IPR016218 Acetyl-CoA decarbonylase/synthase complex, gamma subunit; IPR023427 Acetyl-CoA decarbonylase/synthase complex, gamma subunit, archaea
Root; GO:0008150 biological_process; GO:0055114 oxidation-reduction process; IPR017679 Coenzyme F420 hydrogenase, subunit beta
Root; GO:0008150 biological_process; GO:0009058 biosynthetic process; IPR003178 Methyl-coenzyme M reductase, gamma subunit
Root; GO:0008150 biological_process; GO:0009058 biosynthetic process; IPR016212 Methyl coenzyme M reductase, alpha subunit
Root; GO:0008150 biological_process; GO:0055114 oxidation-reduction process; IPR019946 5,10-methylenetetrahydromethanopterin reductase
Root; GO:0008150 biological_process; GO:0009058 biosynthetic process; IPR017680 CoB--CoM heterodisulphide reductase, subunit C
Root; GO:0008150 biological_process; GO:0055114 oxidation-reduction process; IPR017682 Coenzyme F420 hydrogenase, subunit alpha
Root; GO:0008150 biological_process; GO:0009058 biosynthetic process; IPR005866 Tetrahydromethanopterin S-methyltransferase, subunit G
Root; GO:0008150 biological_process; GO:0009058 biosynthetic process; IPR005865 Tetrahydromethanopterin S-methyltransferase, subunit C
Root; GO:0008150 biological_process; GO:0009058 biosynthetic process; IPR003179 Methyl-coenzyme M reductase, beta subunit
Root; GO:0008150 biological_process; GO:0055114 oxidation-reduction process; IPR004137 Hydroxylamine reductase/Ni-containing CO dehydrogenase; IPR004460 CO dehydrogenase/acetyl-CoA synthase complex alpha subunit
Root; GO:0008150 biological_process; GO:0055114 oxidation-reduction process; IPR017681 Coenzyme F420 hydrogenase, subunit gamma
Root; GO:0008150 biological_process; GO:0009058 biosynthetic process; IPR011307 Tetrahydromethanopterin S-methyltransferase, subunit F
Root; GO:0008150 biological_process; GO:0009058 biosynthetic process; IPR012048 Formylmethanofuran dehydrogenase, fused subunit C/D
Root; GO:0008150 biological_process; GO:0051186 cofactor metabolic process; IPR004461 CO dehydrogenase/acetyl-CoA synthase complex beta subunit; IPR023432 Acetyl-CoA decarbonylase/synthase complex subunit beta, archaeal
Root; GO:0008150 biological_process; GO:0009058 biosynthetic process; IPR003704 CO dehydrogenase beta subunit/acetyl-CoA synthase epsilon subunit
Root; GO:0008150 biological_process; GO:0009058 biosynthetic process; IPR003901 Methyl-coenzyme M reductase, protein D
Root; GO:0008150 biological_process; GO:0009058 biosynthetic process; IPR011904 Acetate-CoA ligase
